# Supplementary material for: Functionalized geminal-diborylalkanes from various electron-deficient alkynes and B2pin2
Source: Royal Society of Chemistry journal article supplement (doi:10.1039/c8qo00513c), 2018-01-01
Supplement: c8qo00513c1.pdf [file c8qo00513c1.pdf]

**Electronic Supplementary Information**  
*for*  
**Functionalized Geminal-diborylalkanes from Various Electron-Deficient Alkynes and B<sub>2</sub>pin<sub>2</sub>**

Guoliang Gao<sup>a</sup>, Zhijie Kuang<sup>a</sup> and Qiuling Song<sup>a,b</sup> \*

<sup>a</sup> Institute of Next Generation Matter Transformation, College of Chemical Engineering and College of Material Sciences at Huaqiao University, Xiamen, Fujian, 361021, P. R. China

<sup>b</sup> College of Pharmaceutical Sciences, Zhejiang University of Technology, Hangzhou, P. R. China 310014

Email: qsong@hqu.edu.cn

## Table of Contents

|                                                                                     |    |
|-------------------------------------------------------------------------------------|----|
| 1. General information.....                                                         | 3  |
| 2. Screening of conditions.....                                                     | 4  |
| 3. General procedure for starting materials.....                                    | 7  |
| 4. General procedure for the synthesis of diborylalkanes.....                       | 11 |
| 5. General procedure for the transformation of diborylalkanes.....                  | 12 |
| 6. Crystal data of <b>3n</b> and <b>6a-para</b> .....                               | 14 |
| 7. The in situ <sup>1</sup> H NMR of compound <b>3a</b> from alkyne <b>1a</b> ..... | 16 |
| 8. Extra contents for reviews comments.....                                         | 17 |
| 9. Characterization data for products.....                                          | 18 |
| 10. NMR spectrum.....                                                               | 34 |
| 11. References.....                                                                 | 87 |

## 1. General information

All reactions were accomplished in Schlenk tubes under an atmosphere of N<sub>2</sub>. Column chromatography was performed over silica gel (200-300 mesh). <sup>1</sup>H NMR spectra were recorded on a 500 M spectrometer and chemical shifts (in ppm) were referred to CDCl<sub>3</sub> (δ=7.26 ppm), d<sub>6</sub>-DMSO (δ=2.5 ppm) (as an internal standard. <sup>13</sup>C NMR spectra were obtained by using the same NMR spectrometer and were calibrated with CDCl<sub>3</sub> (δ=77.0ppm), d<sub>6</sub>-DMSO(δ=40.0ppm). <sup>19</sup>F NMR spectrometers were operated on the same NMR spectrometer with CDCl<sub>3</sub> or d<sub>6</sub>-DMSO. The following abbreviations were used to illuminate the diversities: δ= chemical shifts, J = coupling constant, s=singlet, d=doublet, t=triplet, q=quartet, m=multiplet. HRMS (ESI) were measured with a quadrupole and TOF mass spectrometers. The X-ray single-crystal determination was performed on a Bruker APEX II X-ray single crystal diffractometer. All reagents and solvents were obtained from commercial suppliers, and used without further purification. Reactions were monitored by thin-layer chromatography (TLC). The products were purified by column chromatography on silica gel using petroleum ether and ethyl acetate as the eluent.

## 2. Screening of conditions

**Table S1. Base effect on the reaction.<sup>a</sup>**

$\text{1b} + \text{B}_2\text{pin}_2 \text{ (2 equiv)} \xrightarrow[50\text{ }^\circ\text{C, 12 h}]{\text{Base, Et}_2\text{O, CH}_3\text{OH}} \text{3b}$

| Entry    | Base (0.1 equiv)                   | Yield (%) <sup>a</sup> |
|----------|------------------------------------|------------------------|
| 1        | Na <sub>2</sub> CO <sub>3</sub>    | 23                     |
| 2        | NaHCO <sub>3</sub>                 | 11                     |
| 3        | K <sub>3</sub> PO <sub>4</sub>     | trace                  |
| 4        | K <sub>2</sub> HPO <sub>4</sub>    | trace                  |
| <b>5</b> | <b>K<sub>2</sub>CO<sub>3</sub></b> | <b>56</b>              |
| 6        | NaO-tBu                            | none                   |
| 7        | LiO-tBu                            | trace                  |
| 8        | KO-tBu                             | none                   |
| 9        | CsF                                | none                   |
| 10       | Cs <sub>2</sub> CO <sub>3</sub>    | 19                     |
| 11       | LiOMe                              | none                   |
| 12       | NaOMe                              | trace                  |
| 13       | NaOH                               | none                   |
| 14       | KOH                                | none                   |

Conditions<sup>a</sup> : alkyne (0.2 mmol), CH<sub>3</sub>OH (10 equiv.), Et<sub>2</sub>O (1 mL), 12 h, N<sub>2</sub>, GC yield.

**Table S2. The amount of base effect on the reaction.<sup>a</sup>**

$\text{1b} + \text{B}_2\text{pin}_2 \text{ (2 equiv)} \xrightarrow[50\text{ }^\circ\text{C, 12 h}]{\text{K}_2\text{CO}_3, \text{Et}_2\text{O, CH}_3\text{OH}} \text{3b}$

| Entry    | K <sub>2</sub> CO <sub>3</sub> (X equiv) | Yield (%) <sup>a</sup>     |
|----------|------------------------------------------|----------------------------|
| 1        | 0.1                                      | 56                         |
| 2        | 0.2                                      | 77                         |
| <b>3</b> | <b>0.3</b>                               | <b>92 (88)<sup>b</sup></b> |
| 4        | 0.4                                      | 88                         |
| 5        | 0.5                                      | 66                         |
| 6        | 0.8                                      | 53                         |
| 7        | 1.0                                      | 35                         |

Conditions<sup>a</sup> : alkyne (0.2 mmol), CH<sub>3</sub>OH (10 equiv), Et<sub>2</sub>O (1 mL), 12 h, N<sub>2</sub>, GC yield. <sup>b</sup> Isolated yield.

**Table S3. The amount of B<sub>2</sub>pin<sub>2</sub> effect on the reaction.<sup>a</sup>**

| Entry    | B <sub>2</sub> pin <sub>2</sub> (x equiv) | Yield (%) <sup>a</sup> |
|----------|-------------------------------------------|------------------------|
| 1        | 1.1                                       | 44                     |
| 2        | 1.2                                       | 47                     |
| 3        | 1.3                                       | 55                     |
| 4        | 1.4                                       | 64                     |
| 5        | 1.5                                       | 70                     |
| 6        | 1.8                                       | 85                     |
| <b>7</b> | <b>2.0</b>                                | <b>92</b>              |
| 8        | 2.1                                       | 92                     |

Conditions<sup>a</sup>: alkyne (0.2 mmol), CH<sub>3</sub>OH (10 equiv), Et<sub>2</sub>O (1 mL), 12 h, N<sub>2</sub>, GC yield.

**Table S4. Temperature effect on the reaction.<sup>a</sup>**

| Entry    | Temp (°C) | Yield (%) <sup>a</sup> |
|----------|-----------|------------------------|
| 1        | r.t       | 44                     |
| 2        | 40        | 79                     |
| <b>3</b> | <b>50</b> | <b>92</b>              |
| 4        | 60        | 77                     |
| 5        | 70        | 72                     |

Conditions<sup>a</sup>: alkyne (0.2 mmol), CH<sub>3</sub>OH (10 equiv), Et<sub>2</sub>O (1mL), 12h, N<sub>2</sub>, GC yield.

**Table S5. Time effect on the reaction.<sup>a</sup>**

| Entry    | Time (h)  | Yield (%) <sup>a</sup> |
|----------|-----------|------------------------|
| 1        | 3         | 34                     |
| 2        | 4         | 48                     |
| 3        | 6         | 55                     |
| <b>4</b> | <b>12</b> | <b>92</b>              |
| 5        | 16        | 89                     |

Conditions<sup>a</sup>: alkyne (0.2 mmol), CH<sub>3</sub>OH (10 equiv), Et<sub>2</sub>O (1mL), N<sub>2</sub>, GC yield.

**Table S6. Summarizing of the reaction<sup>a</sup>**

| entry           | B <sub>2</sub> pin <sub>2</sub> (equiv) | K <sub>2</sub> CO <sub>3</sub> (equiv) | Temp (°C) | Yield (%) <sup>a</sup>     |
|-----------------|-----------------------------------------|----------------------------------------|-----------|----------------------------|
| 1               | 1.1                                     | 0.3                                    | 50        | 44                         |
| 2               | 1.5                                     | 0.3                                    | 50        | 70                         |
| <b>3</b>        | <b>2</b>                                | <b>0.3</b>                             | <b>50</b> | <b>92 (88)<sup>b</sup></b> |
| 4               | 2                                       | 0.1                                    | 50        | 56                         |
| 5               | 2                                       | 1                                      | 50        | 35                         |
| 6               | 2                                       | 0.3                                    | r.t       | 44                         |
| 7               | 2                                       | 0.3                                    | 60        | 77                         |
| 8 <sup>c</sup>  | 2                                       | 0.3                                    | 50        | 55                         |
| 9 <sup>d</sup>  | 2                                       | 0.3                                    | 50        | 89                         |
| 10 <sup>e</sup> | 2                                       | 0.3                                    | 50        | 30                         |

<sup>a</sup> Conditions: alkyne (0.2 mmol), CH<sub>3</sub>OH (10 equiv), Et<sub>2</sub>O (1 mL), 12 h, N<sub>2</sub>, GC yield.

<sup>b</sup> Isolated yield. <sup>c</sup> 6 h. <sup>d</sup> 16 h. <sup>e</sup> air.

### 3. General procedure for starting materials

#### 1). General procedure for the preparation of propiolates

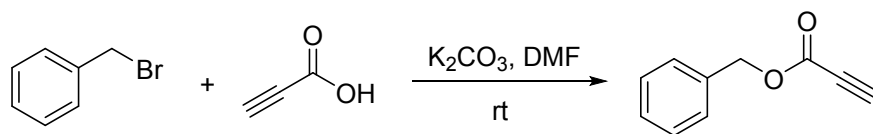

To a suspension of potassium carbonate (4.47 g, 32.3 mmol) in DMF (15 mL), propiolic acid (2.00 mL, 32.3 mmol) in DMF (8 mL) was added and stirred at 0 °C. After 10 min, benzyl bromide (3.20 mL, 26.9 mmol) was added and the reaction mixture was warmed to 25 °C. The resulting solution was stirred for 2 h and then water was added (45 mL). The mixture was extracted with EtOAc–hexanes 1:1 (3 × 30 mL). The combined organic layers were washed with brine and then dried (Na<sub>2</sub>SO<sub>4</sub>). After evaporation of the solvent under reduced pressure, the residue was purified through FCC (SiO<sub>2</sub>; 30% EtOAc in hexanes) to yield a colorless oil (1.79 g, 90%).<sup>1</sup>

#### 2). General procedure for the preparation of propiolamides

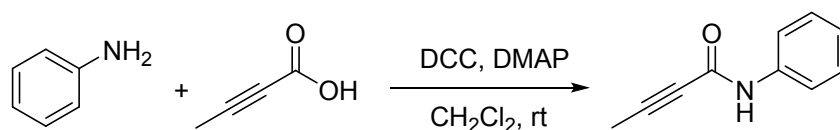

A solution of DMAP (15 mg, 0.13 mmol) and DCC (2.58 g, 13 mmol) in CH<sub>2</sub>Cl<sub>2</sub> (15 mL) was added slowly over 1 h to a solution of propiolic acid (0.77 mL, 13 mmol) and aniline (1.4 mL, 14 mmol) in CH<sub>2</sub>Cl<sub>2</sub> (15 mL) at 0°C. The suspension was then stirred for 5 h at room temperature, monitoring through by TLC (30% EtOAc in hexanes). Upon completion, the mixture was filtered through a layer of Celite and the filtrate concentrated in vacuo. The residue was purified through FCC (SiO<sub>2</sub>; 30% EtOAc in hexanes) to yield a colorless oil (1.79 g, 90%). Spectral data matched those reported in the literature.<sup>2</sup>

#### 3). General procedure for the preparation of ynones

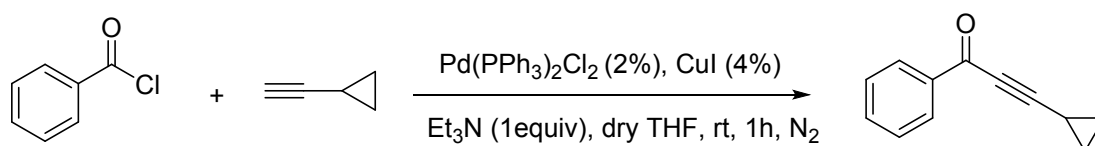

Ketones were prepared according to a literature procedure. Using standard Schlenk line, to a flame-dried round bottom flask equipped with stir bar under N<sub>2</sub> atmosphere was added acid chloride (10.0 mmol, 1.0 equiv), PdCl<sub>2</sub>(PPh<sub>3</sub>)<sub>2</sub> (140 mg, 0.2 mmol, 2.0 mol%), CuI (76 mg, 0.4 mmol, 4.0 mol%), Et<sub>3</sub>N (1.4 mL, 10.0 mmol, 1.0 equiv), and alkyne (1.0 equiv) in dry THF (50 mL) at 25°C. The resulting reaction mixture was stirred at room temperature for 1 h. The reaction was quenched with water (30 mL). The aqueous layer was extracted with EtOAc (3\*30mL). The combined organic layers were washed with brine (30 mL), dried over MgSO<sub>4</sub>, filtered, and concentrated in vacuo. The resulting crude solid was purified by silica gel flash column chromatography using an elution gradient from 100% hexanes to 10% EtOAc in hexanes. Product-containing fractions were combined and concentrated in vacuo to afford target product.<sup>3</sup>

#### 4). General procedure for the preparation of 2-ethynylazoles

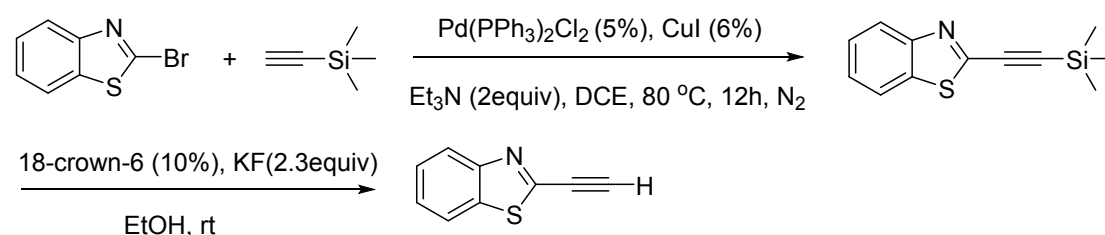

Under a nitrogen atmosphere, to a solution of 2-Bromobenzothiazole (346 mg, 2.1 mmol) in DCE (10 mL) and Et<sub>3</sub>N (2 equiv) were added ethynyltrimethylsilane (0.4 mL, 251 mg, 2.6 mmol) and trans-dichlorobis(triphenylphosphine)palladium(II) (30 mg, 0.04 mmol). The reaction was stirred at rt for 15 min, and then CuI (4 mg, 0.023 mmol) was added. The reaction mixture was stirred at 80 °C for 12.0 h until no more starting product was detected by TLC analysis. The solvent was then evaporated under reduced pressure, and the crude material was purified by flash chromatography over a silica gel column using Hex/EtOAc (85:15) to afford the desired product as a pale yellow solid (489 mg, 91%). Then to a stirred solution of trimethyl(oxazole)silane (322 mg, 1.58 mmol) in EtOH (10mL) was added KF (123 mg, 2.3 equiv) and 18-crown-6 (10 mol%). The reaction was stirred at rt for 2.0 h. The residue was poured into H<sub>2</sub>O (100 mL) and extracted with CH<sub>2</sub>Cl<sub>2</sub> (3 × 150 mL), washed with brine, and dried over Na<sub>2</sub>SO<sub>4</sub>. The solvent was removed at reduced pressure to give the desired product as an orange solid (145 mg, 44%).<sup>4</sup>



## 5). General procedure for the preparation of aryl alkynes

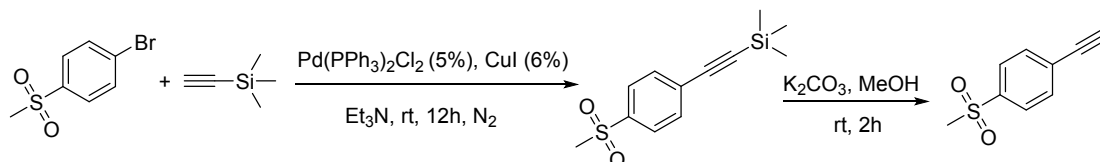

Under a nitrogen atmosphere, to a solution of 1-bromo-4-(methylsulfonyl)benzene (500 mg, 2.13 mmol) in Et<sub>3</sub>N (10 mL) were added ethynyltrimethylsilane (0.35 mL, 251 mg, 2.56 mmol) and *trans*-dichlorobis(triphenylphosphine)palladium(II) (30 mg, 0.04 mmol). The reaction was stirred at rt for 15 min, and then CuI (4 mg, 0.023 mmol) was added. The reaction mixture was stirred at rt for 12.0 h until no more starting product was detected by TLC analysis. The solvent was then evaporated under reduced pressure, and the crude material was purified by flash chromatography over a silica gel column using Hex/EtOAc (85:15) to afford the desired trimethyl((4-(methylsulfonyl)phenyl)ethynyl)silane as a pale yellow solid (489 mg, 91%). Then to a stirred solution of trimethyl((4-(methylsulfonyl)phenyl)-ethynyl)silane (400 mg, 1.58 mmol) in MeOH (11 mL) was added K<sub>2</sub>CO<sub>3</sub> (438 mg, 3.16 mmol). The reaction was stirred at rt for 2.0 h. The residue was poured into H<sub>2</sub>O (100 mL) and extracted with CH<sub>2</sub>Cl<sub>2</sub> (3 × 150 mL), washed with brine, and dried over Na<sub>2</sub>SO<sub>4</sub>. The solvent was removed at reduced pressure to give the desired product as an orange solid (279 mg, 98%).<sup>5</sup>

## 6). General procedure for the preparation of 1-aryl-1-propynes

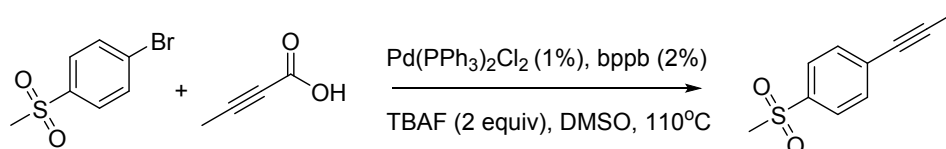

1-Aryl-1-propynes were prepared according to literature procedure. Reactions were performed in a schlenk tube equipped with a stirring bar and capped with a rubber septum. The followings were placed in the tube in order: 21.1 mg (1 mol%) of Pd, 25.6 mg of dppb (2 mol%), 6 ml of TBAF, 3.0 mmol (252.2 mg) of 2-butyric acid and 3.0 mmol of arylbromobenzene. The mixture was stirred at 110°C for 3 h. The reaction mixture was extracted with aqueous NH<sub>4</sub>Cl solution and diethyl ether. The

ether extract was dried over anhydrous  $\text{MgSO}_4$ , filtered, and evaporated under reduced pressures. The reaction mixture was purified by flash chromatography on silica gel (*n*-hexane/ethyl acetate) to afford the product.<sup>6</sup>

## 7). General procedure for the preparation of medicinally relevant substrates

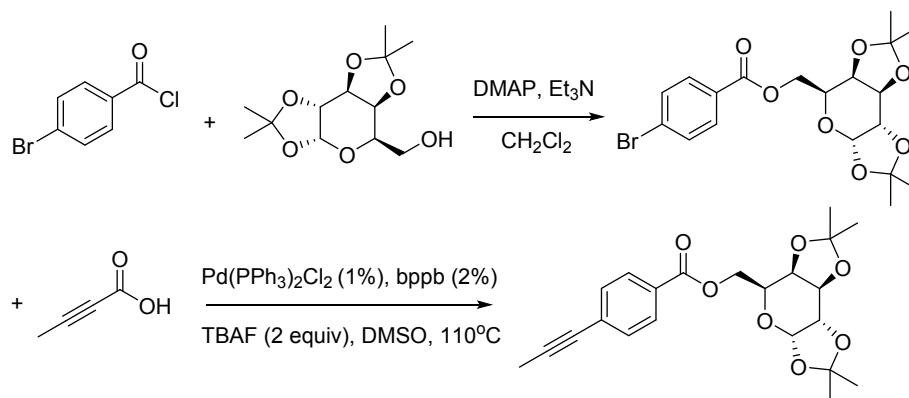

A round-bottom flask was charged with 4-bromobenzoyl chloride (720 mg, 1.1 equiv), 1,2:3,4-di-*O*-isopropylpyridene- $\alpha$ -D-galactopyranose (775 mg, 2.98 mmol),  $\text{Et}_3\text{N}$  (452 mg, 1.50 equiv), DMAP (36 mg, 0.03 equiv) and  $\text{CH}_2\text{Cl}_2$  (20 mL). The reaction mixture was then filtered, and the filtrate was washed with 1M HCl. The organic layer was dried over anhydrous  $\text{Na}_2\text{SO}_4$ , and concentrated in vacuo, which was further purified by column chromatography to give a pure alkyl 4-bromobenzoate. The followings were placed in the tube in order: 21.1 mg (1 mol %) of Pd, 25.6 mg of dppb (2 mol %), 6 ml of TBAF, 3.0 mmol (252.2 mg) of 2-butyneic acid and 3.0 mmol of arylbromobenzene. The mixture was stirred at 110 °C for 3 h. The reaction mixture was extracted with aqueous  $\text{NH}_4\text{Cl}$  solution and diethyl ether. The ether extract was dried over anhydrous  $\text{MgSO}_4$ , filtered, and evaporated under reduced pressures. The reaction mixture was purified by flash chromatography on silica gel (*n*-hexane/ethyl acetate) to afford the product.<sup>7</sup>

## 8). General procedure for the preparation of vinyl(boronate)

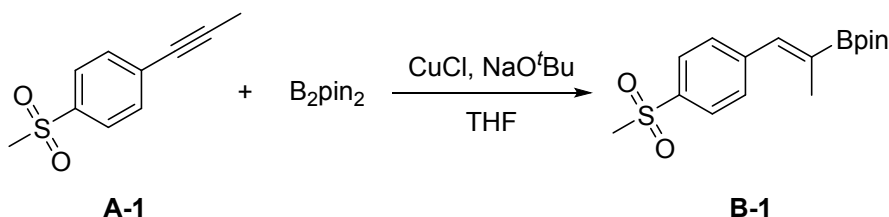

To an oven dried schlenk tube equipped with a stir bar were added **A**<sub>1</sub> (0.25 mmol),  $\text{B}_2\text{pin}_2$  (1.1 equiv), CuCl (2.5 mg, 0.025 mmol), NaOt-Bu (9.6 mg, 0.10 mmol), and

THF (2 mL) under nitrogen. After the mixture was stirred at room temperature for 4h, the reaction mixture was filtered through a pad of Celite and concentrated. The product was purified by silica gel chromatography.<sup>13</sup>

#### 4. General procedure for the synthesis of diborylalkanes

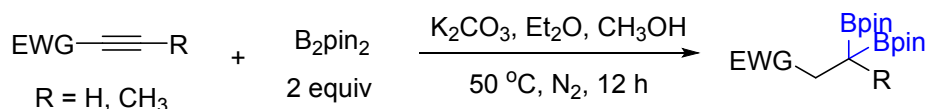

**General procedure A: the synthesis of Geminal-diborylalkanes from aromatic acetylenes and B<sub>2</sub>pin<sub>2</sub>:** In air, a 25 mL Schlenk tube was charged with B<sub>2</sub>pin<sub>2</sub> (2.0 equiv) and K<sub>2</sub>CO<sub>3</sub> (0.3 equiv). The flask was evacuated and filled with nitrogen for three cycles. Et<sub>2</sub>O (1 mL), alkynes (0.2 mmol) and CH<sub>3</sub>OH (80 uL, 10 equiv) were added. The reaction was allowed to stir at 50 °C for 12 hours. Upon completion, the reaction mixture was diluted with ethyl acetate, filtered through a silica gel plug, rinsed with ethyl acetate, and concentrated in vacuo. The crude reaction mixture was purified on silica gel to afford the desired product.

Or a 25 mL Young's tube was charged with B<sub>2</sub>pin<sub>2</sub> (2.0 equiv) and K<sub>2</sub>CO<sub>3</sub> (0.3 equiv), and filled with nitrogen. Then, Et<sub>2</sub>O (0.1 mL), alkynes (0.2 mmol) and CH<sub>3</sub>OH (80 uL, 10 equiv) were added. The reaction was allowed to stir at 50 °C for 12 hours. (**3a-3h**, **3o-3q**)

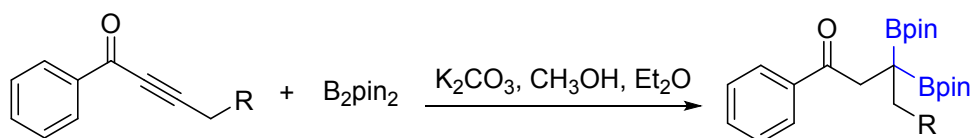

**General procedure B: the synthesis of Geminal-diborylalkanes from carbonyl group-containing alkynes and B<sub>2</sub>pin<sub>2</sub>:** In air, a 25 mL Schlenk tube was charged with B<sub>2</sub>pin<sub>2</sub> (2.0 equiv) and K<sub>2</sub>CO<sub>3</sub> (0.5 equiv). The flask was evacuated and filled with nitrogen for three cycles. Et<sub>2</sub>O (1 mL), alkynes (0.2 mmol) and CH<sub>3</sub>OH (80 uL, 10 equiv) were added. The reaction was allowed to stir at 60 °C for 16 hours. Upon completion, the reaction mixture was diluted with ethyl acetate, filtered through a silica gel plug, rinsed with ethyl acetate, and concentrated in vacuo. The crude reaction mixture was purified on silica gel to afford the desired product.

Or a 25 mL Young's tube was charged with B<sub>2</sub>pin<sub>2</sub> (2.0 equiv) and K<sub>2</sub>CO<sub>3</sub> (0.3 equiv), and filled with nitrogen. Then, Et<sub>2</sub>O (0.1 mL), alkynes (0.2 mmol) and CH<sub>3</sub>OH (80 uL,

10 equiv) were added. The reaction was allowed to stir at 60 °C for 12 hours. (**3i-3n**, **6a-6s**)

## 5. General procedure for the transformation of diborylalkanes

### (1). Typical procedure for Silver-Catalyzed Fluorination of Secondary Alkylboronic Esters.

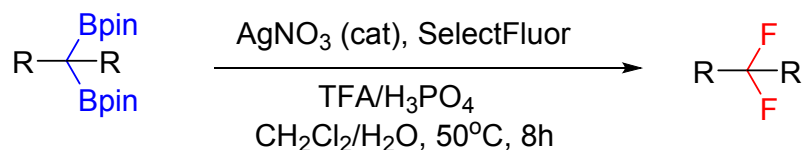

Geminal-diborylalkanes (0.2 mmol), AgNO<sub>3</sub> (14 mg, 0.08 mmol), Selectfluor (424 mg, 0.6 mmol) were placed in a Schlenk tube. The reaction vessel was evacuated and filled with nitrogen for three times. Then dichloromethane (1 mL), water (1 mL), and TFA (0.4 mL), H<sub>3</sub>PO<sub>4</sub> (0.2 mL) were added successively at rt. The reaction mixture was stirred at 60 °C for 8 h. The resulting mixture was extracted with CH<sub>2</sub>Cl<sub>2</sub> (15 mL × 3). The combined organic phases were dried over anhydrous Na<sub>2</sub>SO<sub>4</sub>. After removal of solvent under reduced pressure, the crude product was purified by column chromatography on silica gel with hexane/ethyl acetate (50:1 - 40:1, v:v) as the eluent to give the pure product.<sup>9</sup>

### (2). General procedure for the preparation of synthesis of alkyl mono(boronate)s

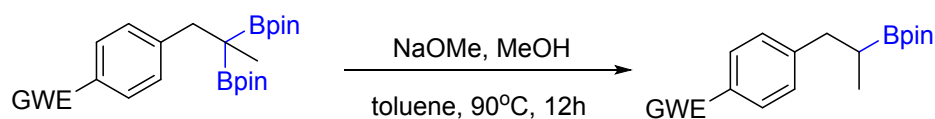

To a dried 10mL reaction tube was added geminal-diborylalkanes (0.26 mmol), NaOMe (14.2 mg, 0.26 mmol), MeOH (32.0 μL, 0.78 mmol) and toluene (2.0 mL). The mixture was stirred at 90 °C for 12 h. The reaction was quenched by HCl aqueous (1%, 5 mL) and extracted with EtOAc (3 × 10 mL). The combined organic phase was washed with saturated brine, dried over Na<sub>2</sub>SO<sub>4</sub> and concentrated in vacuo. The residue was purified by flash chromatography on silica gel using PE/EtOAc (40:1) as the eluent to give the pure product.<sup>10</sup>

### (3). General procedure for the preparation of synthesis of secondary alkylated N-heteroaromatic compounds

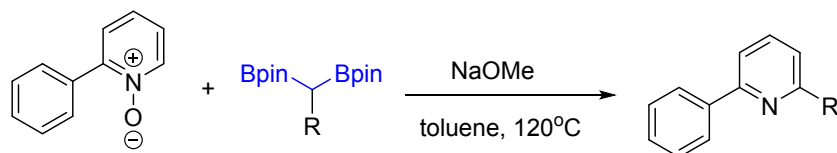

To an oven-dried 4-dram vial equipped with a Teflon coated magnetic stirring bar were added N-heteroaromatic N-oxide (0.20 mmol), NaOMe (3.0 equiv), geminal-diborylalkanes (2.0 equiv) and anhydrous toluene (2.0 mL). The vial was sealed with a PTFE/silicone-lined septum cap and the reaction mixture was stirred at the indicated temperature for 3 h. The reaction mixture was filtered through celite pad and washed with  $\text{CH}_2\text{Cl}_2$  (20 mL). The filtrate was concentrated under reduced pressure. To remove unreacted internal gem-bis[(pinacolato)boryl]alkane,  $\text{NaBO}_3 \cdot 4\text{H}_2\text{O}$  (93 mg, 0.60 mmol) and THF/ $\text{H}_2\text{O}$  (3.0 mL, 1:1) were added to the above obtained crude mixture in a 20 mL vial and stirred for 3 h at room temperature. The reaction mixture was quenched with brine (5.0 mL) and extracted with EtOAc (10 mL x 3). The combined organic layers were dried over  $\text{MgSO}_4$ , filtered and concentrated under reduced pressure. The crude reaction mixture was purified by silica gel column chromatography to yield the desired product.<sup>11</sup>

## 6. Crystal data of 3n and 6a-*para*

Crystallographic data for compound **3n** (CCDC-1570208) has been deposited with the Cambridge Crystallographic Data Centre, Copies of the data can be obtained, free of charge, on application to CCDC (Email:deposit@ccdc.cam.ac.uk).

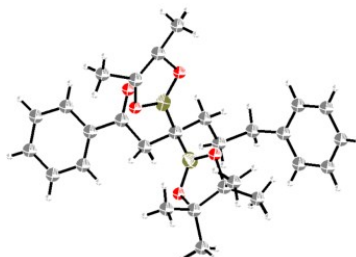

|                                                               |                                          |                                |
|---------------------------------------------------------------|------------------------------------------|--------------------------------|
| Bond precision: C-C = 0.0062 Å                                |                                          | Wavelength=0.71073             |
| Cell:                                                         | a=10.0513(14)                            | b=15.5408(16) c=19.0622(18)    |
|                                                               | alpha=88.904(8)                          | beta=83.30(1) gamma=87.795(10) |
| Temperature:                                                  | 293 K                                    |                                |
| Volume                                                        | Calculated<br>2954.8(6)                  | Reported<br>2954.8(6)          |
| Space group                                                   | P -1                                     | P -1                           |
| Hall group                                                    | -P 1                                     | -P 1                           |
| Moiety formula                                                | C30 H42 B2 O5, C28 H36 B2<br>O5, 2(C H3) | ?                              |
| Sum formula                                                   | C60 H84 B4 O10                           | C60 H84 B4 N0 O10              |
| Mr                                                            | 1008.51                                  | 1008.51                        |
| Dx, g cm <sup>-3</sup>                                        | 1.133                                    | 1.134                          |
| Z                                                             | 2                                        | 2                              |
| Mu (mm <sup>-1</sup> )                                        | 0.074                                    | 0.074                          |
| F000                                                          | 1088.0                                   | 1088.0                         |
| F000'                                                         | 1088.49                                  |                                |
| h, k, lmax                                                    | 13, 21, 26                               | 13, 21, 25                     |
| Nref                                                          | 16394                                    | 13325                          |
| Tmin, Tmax                                                    | 0.992, 0.994                             | 0.992, 0.994                   |
| Tmin'                                                         | 0.992                                    |                                |
| Correction method= # Reported T Limits: Tmin=0.992 Tmax=0.994 |                                          |                                |
| AbsCorr = MULTI-SCAN                                          |                                          |                                |
| Data completeness= 0.813                                      | Theta(max)= 29.450                       |                                |
| R(reflections)= 0.0933( 5997)                                 | wR2(reflections)= 0.3251( 13325)         |                                |
| S = 1.012                                                     | Npar= 683                                |                                |

Crystallographic data for compound **6a-para** (CCDC-1523638) has been deposited with the Cambridge Crystallographic Data Centre, Copies of the data can be obtained, free of charge, on application to CCDC (Email:deposit@ccdc.cam.ac.uk).

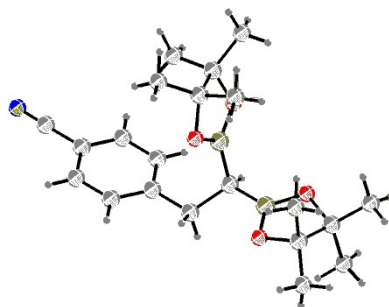

Bond precision: C-C = 0.0044 Å      Wavelength=0.71073

Cell:            a=9.6906(9)            b=10.9669(11)            c=11.5436(13)  
                   alpha=70.045(10)      beta=86.183(8)      gamma=84.832(8)

Temperature:    295 K

|                        | Calculated      | Reported        |
|------------------------|-----------------|-----------------|
| Volume                 | 1147.6(2)       | 1147.6(2)       |
| Space group            | P -1            | P -1            |
| Hall group             | -P 1            | -P 1            |
| Moiety formula         | C21 H31 B2 N O4 | C21 H31 B2 N O4 |
| Sum formula            | C21 H31 B2 N O4 | C21 H31 B2 N O4 |
| Mr                     | 383.09          | 383.09          |
| Dx, g cm <sup>-3</sup> | 1.109           | 1.109           |
| Z                      | 2               | 2               |
| Mu (mm <sup>-1</sup> ) | 0.074           | 0.074           |
| F000                   | 412.0           | 412.0           |
| F000'                  | 412.18          |                 |
| h, k, lmax             | 13, 15, 15      | 12, 15, 15      |
| Nref                   | 6196            | 5241            |
| Tmin, Tmax             | 0.965, 0.978    | 0.489, 1.000    |
| Tmin'                  | 0.964           |                 |

Correction method= # Reported T Limits: Tmin=0.489 Tmax=1.000  
 AbsCorr = MULTI-SCAN

Data completeness= 0.846            Theta(max)= 29.172

R(reflections)= 0.0724( 2923)      wR2(reflections)= 0.2056( 5241)

S = 1.032                            Npar= 261

## 7. The in situ $^1\text{H}$ NMR of compound 3a from alkyne 1a

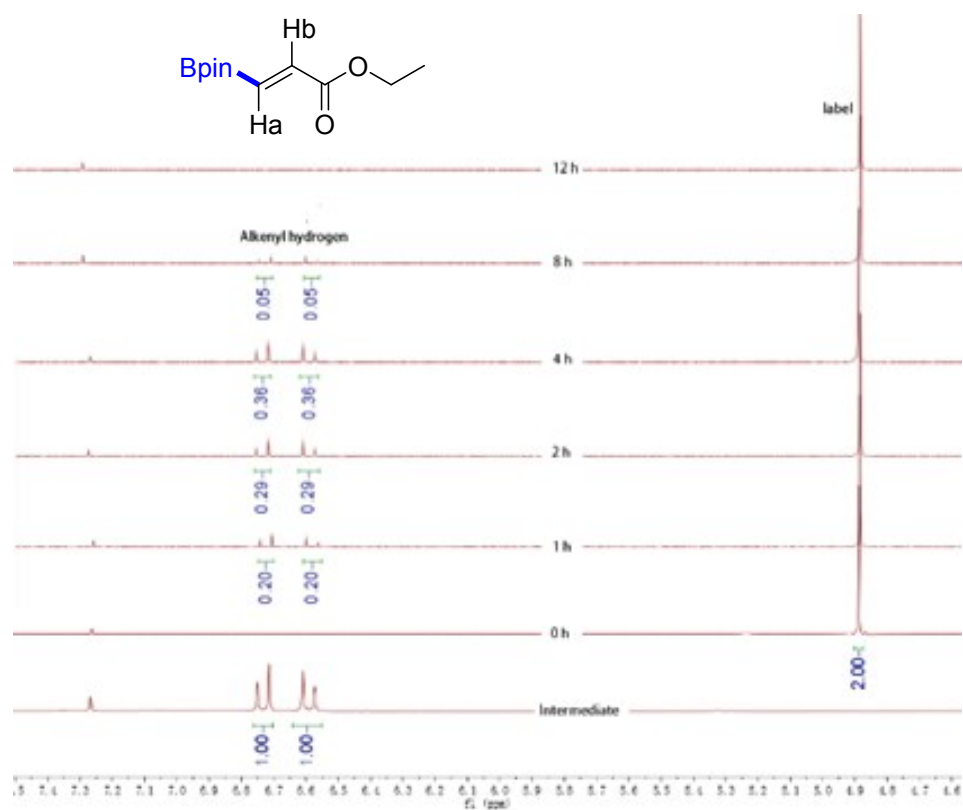



## 8. Extra contents for reviews comments

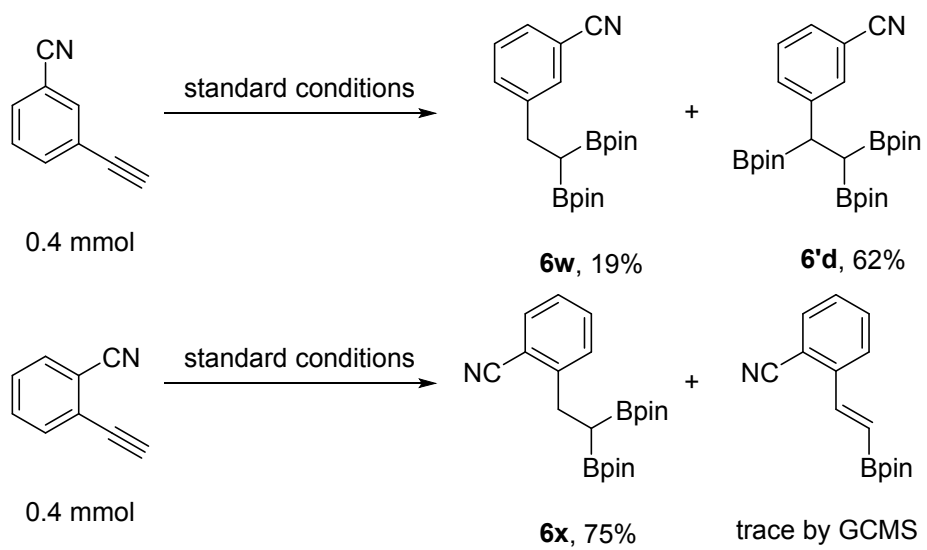

## 9. Characterization data for products

**Ethyl 3,3-bis(4,4,5,5-tetramethyl-1,3,2-dioxaborolan-2-yl)propanoate (3a) (CAS: No. 1302132-95-1)<sup>4</sup>**

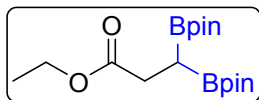

The reaction was performed following the general procedure A. Colorless oil, 88% yield (62.3 mg). <sup>1</sup>H NMR (500 MHz, CDCl<sub>3</sub>) δ 4.08 (q, *J* = 7.1 Hz, 2H), 2.54 (d, *J* = 8.3 Hz, 2H), 1.24 – 1.20 (m, 15H), 1.20 (s, 12H), 1.09 – 1.03 (m, 1H). <sup>13</sup>C NMR (126 MHz, CDCl<sub>3</sub>) δ 174.9, 83.2, 60.2, 30.6, 24.8, 24.4, 14.3.

**Methyl 3,3-bis(4,4,5,5-tetramethyl-1,3,2-dioxaborolan-2-yl)propanoate (3b) (CAS: No. 1800103-38-1)<sup>12</sup>**

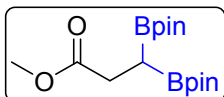

The reaction was performed following the general procedure A. Colorless oil, 80% yield (54.4 mg). <sup>1</sup>H NMR (500 MHz, CDCl<sub>3</sub>) δ 3.62 (s, 3H), 2.55 (d, *J* = 8.3 Hz, 2H), 1.22 (s, 12H), 1.20 (s, 12H), 1.06 (dd, *J* = 10.7, 5.7 Hz, 1H). <sup>13</sup>C NMR (126 MHz, CDCl<sub>3</sub>) δ 175.3, 83.2, 51.5, 30.3, 24.8, 24.4.

**Tert-butyl 3,3-bis(4,4,5,5-tetramethyl-1,3,2-dioxaborolan-2-yl)propanoate (3c) (CAS: No. 1812184-92-1)<sup>12</sup>**

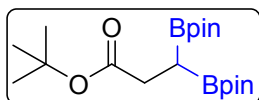

The reaction was performed following the general procedure A. Colorless oil, 78% yield (59.3 mg). <sup>1</sup>H NMR (500 MHz, CDCl<sub>3</sub>) δ 2.48 (d, *J* = 8.5 Hz, 2H), 1.40 (s, 9H), 1.22 (s, 12H), 1.19 (s, 12H), 1.03 (t, *J* = 8.4 Hz, 1H). <sup>13</sup>C NMR (126 MHz, CDCl<sub>3</sub>) δ 174.2, 83.1, 79.6, 31.7, 28.1, 25.0, 24.8, 24.4.

**3,5-Dimethylbenzyl 3,3-bis(4,4,5,5-tetramethyl-1,3,2-dioxaborolan-2-yl)propanoate (3d)**

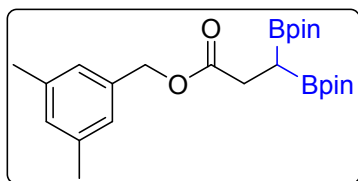

The reaction was performed following the general procedure A. Colorless oil, 50% yield (44.4 mg). <sup>1</sup>H NMR (500 MHz, CDCl<sub>3</sub>) δ 6.95 (s, 2H), 6.92 (s, 1H), 5.02 (s, 2H), 2.63 (d, *J* = 8.3 Hz, 2H), 2.30 (s, 6H), 1.22 (s, 12H), 1.19 (s, 12H), 1.11 (t, *J* = 8.3 Hz,

1H). <sup>13</sup>C NMR (125 MHz, CDCl<sub>3</sub>) δ 174.7, 137.9, 136.1, 129.5, 125.8, 124.8, 83.2, 66.1, 30.6, 24.8, 24.4, 21.2.

HRMS (ESI, m/z) calcd for <sup>12</sup>C<sub>24</sub><sup>1</sup>H<sub>38</sub><sup>10</sup>B<sub>2</sub><sup>16</sup>O<sub>6</sub>[M+H]<sup>+</sup>: 443.3000; found: 443.3002.

**Ethyl 3,3-bis(4,4,5,5-tetramethyl-1,3,2-dioxaborolan-2-yl)butanoate (3e)**(CAS: No. 1009307-15-6)<sup>13</sup>

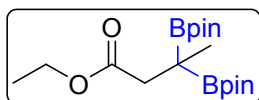

The reaction was performed following the general procedure A. Colorless oil, 84% yield (61.3 mg). <sup>1</sup>H NMR (500 MHz, CDCl<sub>3</sub>) δ 4.09 (q, *J* = 7.1 Hz, 2H), 2.56 (s, 2H), 1.28 – 1.25 (m, 3H), 1.23 (s, 12H), 1.21 (s, 12H), 1.09 (s, 3H). <sup>13</sup>C NMR (126 MHz, CDCl<sub>3</sub>) δ 174.1, 83.2, 60.0, 39.1, 24.6, 24.8, 16.7, 14.3.

**Ethyl 3,3-bis(4,4,5,5-tetramethyl-1,3,2-dioxaborolan-2-yl)butanoate (3e)**(CAS: No. 1009307-15-6)<sup>13</sup>

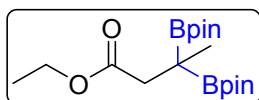

The reaction was performed following the general procedure A. Colorless oil, 84% yield (61.3 mg). <sup>1</sup>H NMR (500 MHz, CDCl<sub>3</sub>) δ 4.09 (q, *J* = 7.1 Hz, 2H), 2.56 (s, 2H), 1.28 – 1.25 (m, 3H), 1.23 (s, 12H), 1.21 (s, 12H), 1.09 (s, 3H). <sup>13</sup>C NMR (126 MHz, CDCl<sub>3</sub>) δ 174.1, 83.2, 60.0, 39.1, 24.6, 24.8, 16.7, 14.3.

**Ethyl 3,3-bis(4,4,5,5-tetramethyl-1,3,2-dioxaborolan-2-yl)heptanoate (3f)**

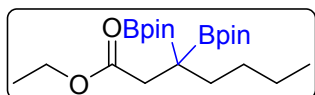

The reaction was performed following the general procedure A. Colorless oil, 64% yield (52.5 mg). <sup>1</sup>H NMR (500 MHz, CDCl<sub>3</sub>) δ 4.08 (t, *J* = 7.1 Hz, 2H), 2.64 (s, 2H), 1.63 (dd, *J* = 10.2, 6.6 Hz, 2H), 1.25 (d, *J* = 2.3 Hz, 5H), 1.22 (s, 12H), 1.21 (s, 12H), 1.18 – 1.13 (m, 2H), 0.84 (t, *J* = 7.3 Hz, 3H). <sup>13</sup>C NMR (125 MHz, CDCl<sub>3</sub>) δ 174.2, 83.1, 59.9, 34.9, 29.6, 29.8, 24.9, 24.7, 24.5, 23.3, 14.3, 14.1.

HRMS (ESI, m/z) calcd for <sup>12</sup>C<sub>21</sub><sup>1</sup>H<sub>40</sub><sup>10</sup>B<sub>2</sub><sup>16</sup>O<sub>6</sub>[M+H]<sup>+</sup>: 409.3156; found: 409.3157.

**Benzyl 3,3-bis(4,4,5,5-tetramethyl-1,3,2-dioxaborolan-2-yl)butanoate (3g)**

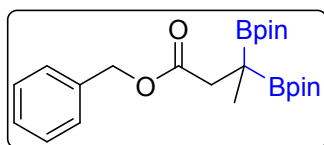

The reaction was performed following the general procedure A. Colorless oil, 78% yield (67.1 mg). <sup>1</sup>H NMR (500 MHz, CDCl<sub>3</sub>) δ 7.32 (d, *J* = 4.5 Hz, 4H), 7.30 – 7.27 (m, 1H), 5.09 (s, 2H), 2.64 (s, 2H), 1.21 (s, 12H), 1.19 (s, 12H), 1.11 (s, 3H). <sup>13</sup>C

NMR (125 MHz, CDCl<sub>3</sub>)  $\delta$  173.9, 136.3, 128.4, 128.0, 127.9, 83.2, 65.9, 39.0, 24.9, 24.6, 16.6.

HRMS (ESI, m/z) calcd for <sup>12</sup>C<sub>23</sub><sup>1</sup>H<sub>36</sub><sup>10</sup>B<sub>2</sub><sup>16</sup>O<sub>6</sub>[M+H]<sup>+</sup>: 429.2843; found: 429.2845.

### 2-Bromobenzyl3,3-bis(4,4,5,5-tetramethyl-1,3,2-dioxaborolan-2-yl)butanoate (3h)

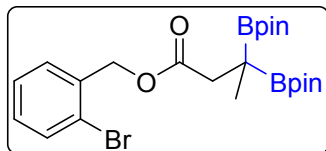

The reaction was performed following the general procedure A. Colorless oil, 68% yield (74.8 mg). <sup>1</sup>H NMR (500 MHz, CDCl<sub>3</sub>)  $\delta$  7.53 (d, *J* = 8.7 Hz, 1H), 7.38 (d, *J* = 6.4 Hz, 1H), 7.29 (d, *J* = 7.5 Hz, 1H), 7.15 (t, *J* = 8.5 Hz, 1H), 5.17 (s, 2H), 2.68 (s, 2H), 1.21 (s, 12H), 1.20 (s, 12H), 1.13 (s, 3H). <sup>13</sup>C NMR (125 MHz, CDCl<sub>3</sub>)  $\delta$  173.6, 135.7, 132.6, 129.4, 129.3, 127.3, 122.9, 83.5, 83.2, 65.4, 38.9, 24.9, 24.6, 24.5, 16.7. HRMS (ESI, m/z) calcd for <sup>12</sup>C<sub>23</sub><sup>1</sup>H<sub>35</sub><sup>10</sup>B<sub>2</sub><sup>16</sup>O<sub>6</sub><sup>80</sup>Br[M+H]<sup>+</sup>: 507.1949; found: 507.1950.

### 4,4-Bis(4,4,5,5-tetramethyl-1,3,2-dioxaborolan-2-yl)butan-2-one (3i)(CAS: No. 1175712-38-5)<sup>14</sup>

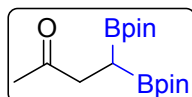

The reaction was performed following the general procedure A. Colorless oil, 73% yield (46.7 mg). <sup>1</sup>H NMR (500 MHz, CDCl<sub>3</sub>)  $\delta$  2.73 (d, *J* = 8.1 Hz, 2H), 2.10 (s, 3H), 1.23 (s, 12H), 1.20 (s, 12H), 0.96 (t, *J* = 8.0 Hz, 1H). <sup>13</sup>C NMR (125 MHz, CDCl<sub>3</sub>)  $\delta$  209.03, 83.1, 40.7, 29.1, 25.0, 24.7, 24.5.

### 4,4-Bis(4,4,5,5-tetramethyl-1,3,2-dioxaborolan-2-yl)hexan-2-one (3j)

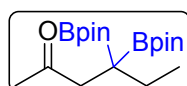

The reaction was performed following the general procedure A. Colorless oil, 70% yield (49.3 mg). <sup>1</sup>H NMR (500 MHz, CDCl<sub>3</sub>)  $\delta$  2.83 (s, 2H), 2.09 (s, 3H), 1.64 (q, *J* = 7.5 Hz, 2H), 1.24 (s, 12H), 1.22 (s, 12H), 0.78 (t, *J* = 7.5 Hz, 3H). <sup>13</sup>C NMR (125 MHz, CDCl<sub>3</sub>)  $\delta$  208.9, 83.09, 44.39, 29.6, 24.9, 24.8, 24.7, 22.8, 11.7.

HRMS (ESI, m/z) calcd for <sup>12</sup>C<sub>18</sub><sup>1</sup>H<sub>34</sub><sup>10</sup>B<sub>2</sub><sup>16</sup>O<sub>5</sub>[M+Na]<sup>+</sup>: 373.2506; found: 373.2506.

### 1-Phenyl-3,3-bis(4,4,5,5-tetramethyl-1,3,2-dioxaborolan-2-yl)heptan-1-one (3k)

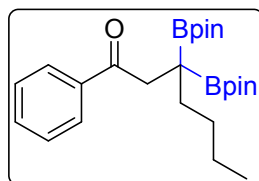

The reaction was performed following the general procedure B. Colorless oil, 74% yield (65.4 mg). <sup>1</sup>H NMR (500 MHz, CDCl<sub>3</sub>)  $\delta$  7.99 (dd, *J* = 8.3, 1.2 Hz, 2H), 7.52 (t,

$J = 7.4$  Hz, 1H), 7.42 (t,  $J = 7.7$  Hz, 2H), 3.37 (s, 2H), 1.68 (dd,  $J = 10.1, 6.6$  Hz, 2H), 1.26 (s, 12H), 1.24 (s, 12H), 1.22 – 1.19 (m, 2H), 1.15 – 1.10 (m, 2H), 0.79 (t,  $J = 7.3$  Hz, 3H).  $^{13}\text{C}$  NMR (125 MHz,  $\text{CDCl}_3$ )  $\delta$  200.5, 137.1, 132.7, 128.4, 127.9, 82.9, 41.0, 31.3, 30.2, 24.7, 24.6, 22.9, 14.1.  
HRMS (ESI,  $m/z$ ) calcd for  $^{12}\text{C}_{25}\text{H}_{40}^{10}\text{B}_2^{16}\text{O}_5[\text{M}+\text{Na}]^+$ : 463.3027; found: 463.3027.

**3-Cyclopropyl-1-phenyl-3,3-bis(4,4,5,5-tetramethyl-1,3,2-dioxaborolan-2-yl)propan-1-one (3l)**

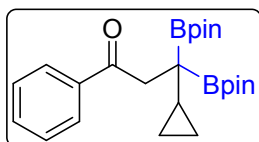

The reaction was performed following the general procedure B. Colorless oil, 67% yield (57.1 mg).  $^1\text{H}$  NMR (500 MHz,  $\text{CDCl}_3$ )  $\delta$  8.00 (dd,  $J = 8.3, 1.2$  Hz, 2H), 7.52 (t,  $J = 7.4$  Hz, 1H), 7.43 (t,  $J = 7.6$  Hz, 2H), 3.29 (s, 2H), 1.26 (s, 12H), 1.24 (s, 12H), 1.11 – 1.06 (m, 1H), 0.35 (ddd,  $J = 8.4, 5.8, 4.4$  Hz, 2H), 0.22 – 0.18 (m, 2H).  $^{13}\text{C}$  NMR (125 MHz,  $\text{CDCl}_3$ )  $\delta$  200.3, 137.2, 132.6, 128.3, 128.1, 82.9, 42.5, 24.7, 24.6, 12.9, 3.5.

HRMS (ESI,  $m/z$ ) calcd for  $^{12}\text{C}_{24}\text{H}_{36}^{10}\text{B}_2^{16}\text{O}_5[\text{M}+\text{H}]^+$ : 425.2894; found: 425.28

**1-Phenyl-3,3-bis(4,4,5,5-tetramethyl-1,3,2-dioxaborolan-2-yl)decan-1-one (3m)**

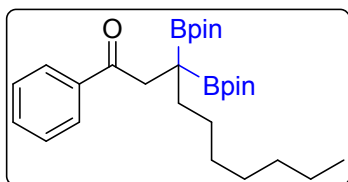

The reaction was performed following the general procedure B. Colorless oil, 78% yield (75.5 mg).  $^1\text{H}$  NMR (500 MHz,  $\text{CDCl}_3$ )  $\delta$  8.02 – 7.96 (m, 2H), 7.51 (t,  $J = 6.7$  Hz, 1H), 7.42 (t,  $J = 7.6$  Hz, 2H), 3.37 (s, 2H), 1.71 – 1.64 (m, 2H), 1.26 (s, 12H), 1.24 (s, 12H), 1.16 (dt,  $J = 19.0, 11.4$  Hz, 10H), 0.81 (t,  $J = 7.1$  Hz, 3H).  $^{13}\text{C}$  NMR (125 MHz,  $\text{CDCl}_3$ )  $\delta$  200.2, 137.3, 132.5, 128.3, 128.1, 83.0, 40.1, 31.8, 30.0, 29.2, 27.7, 24.8, 24.7, 22.6, 14.1.

HRMS (ESI,  $m/z$ ) calcd for  $^{12}\text{C}_{28}\text{H}_{46}^{10}\text{B}_2^{16}\text{O}_5[\text{M}+\text{Na}]^+$ : 505.3496; found: 505.3498.

**1,6-Diphenyl-3,3-bis(4,4,5,5-tetramethyl-1,3,2-dioxaborolan-2-yl)hexan-1-one (3n)**

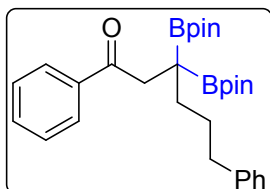

The reaction was performed following the general procedure B. Colorless oil, 70% yield (75.6 mg).  $^1\text{H}$  NMR (500 MHz,  $\text{CDCl}_3$ )  $\delta$  7.98 (d,  $J = 7.1$  Hz, 2H), 7.53 (t,  $J = 8.0$  Hz, 1H), 7.43 (t,  $J = 7.7$  Hz, 2H), 7.20 (t,  $J = 7.4$  Hz, 2H), 7.10 (dd,  $J = 12.0, 6.5$  Hz, 3H), 3.38 (s, 2H), 2.56 – 2.50 (m, 2H), 1.84 – 1.80 (m, 2H), 1.54 – 1.45 (m, 2H), 1.28 (s, 12H), 1.25 (s, 12H).  $^{13}\text{C}$  NMR (125 MHz,  $\text{CDCl}_3$ )  $\delta$  200.0, 143.0, 137.1,

132.6, 128.2, 128.1, 125.4, 83.1, 77.3, 77.0, 76.8, 40.0, 36.7, 31.6, 30.2, 30.1, 24.8, 24.7, 22.6, 14.1.

HRMS (ESI, m/z) calcd for  $^{12}\text{C}_{30}^{1}\text{H}_{42}^{10}\text{B}_2^{16}\text{O}_5[\text{M}+\text{H}]^+$ : 503.3364; found: 503.3367.

**N-phenyl-3,3-bis(4,4,5,5-tetramethyl-1,3,2-dioxaborolan-2-yl)butanamide (3o)**

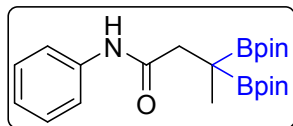

The reaction was performed following the general procedure A. Colorless oil, 66% yield (54.8 mg).  $^1\text{H}$  NMR (500 MHz,  $\text{CDCl}_3$ )  $\delta$  7.69 (s, 1H), 7.49 (d,  $J = 7.9$  Hz, 2H), 7.27 (dd,  $J = 10.5, 5.0$  Hz, 2H), 7.04 (t,  $J = 7.3$  Hz, 1H), 2.61 (s, 2H), 1.24 (s, 24H), 1.16 (s, 3H).  $^{13}\text{C}$  NMR (125 MHz,  $\text{CDCl}_3$ )  $\delta$  171.4, 138.3, 128.8, 123.56, 119.4, 83.4, 42.3, 24.7, 24.6, 16.6.

HRMS (ESI, m/z) calcd for  $^{12}\text{C}_{22}^{1}\text{H}_{35}^{10}\text{B}_2^{16}\text{O}_5^{14}\text{N}[\text{M}+\text{H}]^+$ : 414.2847; found: 414.2848.

**N-methyl-N-phenyl-3,3-bis(4,4,5,5-tetramethyl-1,3,2-dioxaborolan-2-yl)butanamide (3p)**

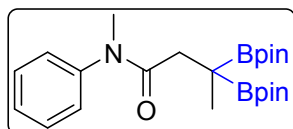

The reaction was performed following the general procedure A. Colorless oil, 78% yield (67.1 mg).  $^1\text{H}$  NMR (500 MHz,  $\text{CDCl}_3$ )  $\delta$  7.40 (t,  $J = 7.5$  Hz, 2H), 7.33 (d,  $J = 6.9$  Hz, 1H), 7.17 (d,  $J = 7.4$  Hz, 2H), 3.27 (s, 3H), 2.35 (s, 2H), 1.20 (d,  $J = 4.5$  Hz, 24H), 0.98 (s, 3H).  $^{13}\text{C}$  NMR (125 MHz,  $\text{CDCl}_3$ )  $\delta$  143.5, 129.7, 129.1, 127.8, 127.2, 82.4, 41.1, 38.2, 29.7, 24.8, 18.0.

HRMS(ESI, m/z) calcd for  $^{12}\text{C}_{23}^1\text{H}_{37}^{10}\text{B}_2^{16}\text{O}_5^{14}\text{N}[\text{M}+\text{Na}]^+$ : 450.2823; found: 450.2825.

**N-(4-(tert-butyl)phenyl)-3,3-bis(4,4,5,5-tetramethyl-1,3,2-dioxaborolan-2-yl)butanamide (3q)**

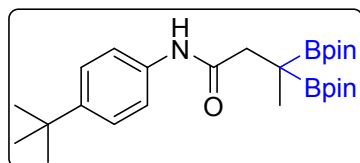

The reaction was performed following the general procedure A. Colorless oil, 66% yield (62.2 mg).  $^1\text{H}$  NMR (500 MHz,  $\text{CDCl}_3$ )  $\delta$  7.60 (s, 1H), 7.41 (d,  $J = 8.6$  Hz, 2H), 7.30 (d,  $J = 8.6$  Hz, 2H), 2.60 (s, 2H), 1.29 (s, 9H), 1.25 (s, 24H), 0.07 (s, 3H).  $^{13}\text{C}$  NMR (125 MHz,  $\text{CDCl}_3$ )  $\delta$  171.2, 146.4, 135.7, 125.6, 119.2, 83.3, 42.2, 34.3, 31.3, 25.0, 24.7, 24.6, 16.5.

HRMS (ESI, m/z) calcd for  $^{12}\text{C}_{26}^1\text{H}_{43}^{10}\text{B}_2^{16}\text{O}_5^{14}\text{N}[\text{M}+\text{H}]^+$ : 470.3473; found: 470.3473.

**1,3-diphenyl-3-(4,4,5,5-tetramethyl-1,3,2-dioxaborolan-2-yl)propan-1-one (3r)**

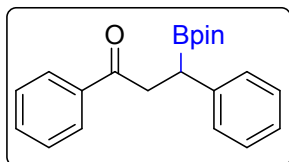

The reaction was performed following the general procedure A. Colorless oil, 60% yield.  $^1\text{H}$  NMR (500 MHz,  $\text{CDCl}_3$ )  $\delta$  7.97 (dd,  $J = 8.3, 1.1$  Hz, 2H), 7.54 (t,  $J = 7.4$  Hz, 1H), 7.44 (t,  $J = 7.7$  Hz, 2H), 7.30 (dt,  $J = 15.2, 7.4$  Hz, 4H), 7.17 (t,  $J = 6.9$  Hz, 1H), 3.56 (dd,  $J = 18.3, 10.9$  Hz, 1H), 3.43 (dd,  $J = 18.3, 5.0$  Hz, 1H), 2.80 (dd,  $J = 10.9, 5.0$  Hz, 1H), 1.25 (s, 6H), 1.17 (s, 6H).  $^{13}\text{C}$  NMR (125 MHz,  $\text{CDCl}_3$ )  $\delta$  199.7, 141.9, 136.7, 132.9, 128.5, 128.4, 128.3, 128.0, 125.6, 83.4, 43.2, 24.53, 24.50.

#### 4-(3-oxo-3-phenylpropyl)benzonitrile (3s)

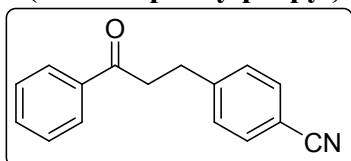

The reaction was performed following the general procedure A. Colorless oil, 78% yield.  $^1\text{H}$  NMR (500 MHz,  $\text{CDCl}_3$ )  $\delta$  7.94 (d,  $J = 7.6$  Hz, 2H), 7.57 (t,  $J = 7.2$  Hz, 3H), 7.46 (t,  $J = 7.7$  Hz, 2H), 7.37 (d,  $J = 8.1$  Hz, 2H), 3.33 (t,  $J = 7.4$  Hz, 2H), 3.14 (t,  $J = 7.4$  Hz, 2H).  $^{13}\text{C}$  NMR (125 MHz,  $\text{CDCl}_3$ )  $\delta$  198.2, 147.0, 136.5, 133.3, 132.2, 129.3, 128.7, 127.9, 118.9, 110.0, 39.4, 29.9.

#### 4-(2,2-Bis(4,4,5,5-tetramethyl-1,3,2-dioxaborolan-2-yl)ethyl)benzonitrile (6a-*para*)

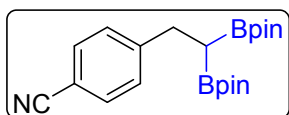

The reaction was performed following the general procedure A. White solid (mp: 168.2-169.3  $^{\circ}\text{C}$ ), 88% yield (67.4 mg).  $^1\text{H}$  NMR (500 MHz,  $\text{CDCl}_3$ )  $\delta$  7.51 (d,  $J = 8.2$  Hz, 2H), 7.33 (d,  $J = 8.2$  Hz, 2H), 2.91 (d,  $J = 8.4$  Hz, 2H), 1.16 (d,  $J = 10.5$  Hz, 24H), 1.12 (d,  $J = 8.4$  Hz, 1H).  $^{13}\text{C}$  NMR (125 MHz,  $\text{CDCl}_3$ )  $\delta$  150.3, 131.8, 129.1, 119.3, 109.1, 83.3, 31.5, 24.8, 24.5.

HRMS-(DART) for:  $^{12}\text{C}_{21}^{1}\text{H}_{31}^{10}\text{B}_2^{14}\text{N}^{16}\text{O}_4[\text{M}+\text{H}]^+$ : calculated: 382.2585, found: 382.2585.

#### 3-(2,2-Bis(4,4,5,5-tetramethyl-1,3,2-dioxaborolan-2-yl)ethyl)benzonitrile (6a-*meta*)

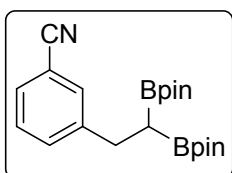

The reaction was performed following the general procedure A. Colorless oil, 19% yield.  $^1\text{H}$  NMR (500 MHz,  $\text{CDCl}_3$ )  $\delta$  7.55 (s, 1H), 7.47 – 7.40 (m, 2H), 7.31 (t,  $J = 7.7$  Hz, 1H), 2.88 (d,  $J = 8.3$  Hz, 2H), 1.25 (d,  $J = 3.0$  Hz, 1H), 1.18 (s, 12H), 1.17 (s, 12H).  $^{13}\text{C}$  NMR (125 MHz,  $\text{CDCl}_3$ )  $\delta$  145.9, 133.0, 132.1, 129.3, 128.8, 119.2, 111.8, 83.4, 31.0, 25.0, 24.8, 24.6, 24.5.

HRMS(ESI,m/z) calcd for  $^{12}\text{C}_{21}^{1}\text{H}_{31}^{11}\text{B}_2^{14}\text{N}^{16}\text{O}_4^{23}\text{Na}[\text{M}+\text{Na}]^+$ : 406.2331; found: 406.2329.

**2-(2,2-bis(4,4,5,5-tetramethyl-1,3,2-dioxaborolan-2-yl)ethyl)benzonitrile (6a-ortho)**

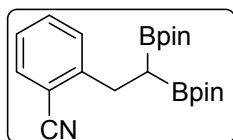

The reaction was performed following the general procedure A. Colorless oil, 75% yield.  $^1\text{H}$  NMR (500 MHz,  $\text{CDCl}_3$ )  $\delta$  7.54 (dd,  $J = 7.7, 0.9$  Hz, 1H), 7.46 – 7.38 (m, 2H), 7.21 (td,  $J = 7.5, 1.5$  Hz, 1H), 3.08 (d,  $J = 8.2$  Hz, 2H), 1.25 (t,  $J = 4.0$  Hz, 1H), 1.17 (d,  $J = 8.1$  Hz, 24H).  $^{13}\text{C}$  NMR (125 MHz,  $\text{CDCl}_3$ )  $\delta$  148.4, 132.6, 132.2, 129.2, 126.0, 118.1, 112.4, 83.3, 29.8, 25.0, 24.8, 24.4.

HRMS(ESI,m/z) calcd for  $^{12}\text{C}_{21}^{1}\text{H}_{31}^{11}\text{B}_2^{14}\text{N}^{16}\text{O}_4^{23}\text{Na}[\text{M}+\text{Na}]^+$ : 406.2331; found: 406.2332.

**1-(4-(2,2-Bis(4,4,5,5-tetramethyl-1,3,2-dioxaborolan-2-yl)ethyl)phenyl)ethan-1-one (6b)**

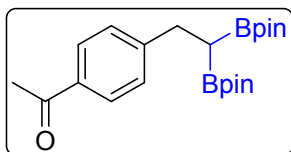

The reaction was performed following the general procedure A. White solid (mp: 174.2-175.3 °C), 78% yield (62.4 mg).  $^1\text{H}$  NMR (500 MHz,  $\text{CDCl}_3$ )  $\delta$  7.89 (d,  $J = 8.3$  Hz, 2H), 7.29 (d,  $J = 8.2$  Hz, 2H), 3.87 (s, 3H), 2.91 (d,  $J = 8.3$  Hz, 2H), 1.30 (d,  $J = 1.9$  Hz, 1H), 1.16 (d,  $J = 8.4$  Hz, 24H).  $^{13}\text{C}$  NMR (125 MHz,  $\text{CDCl}_3$ )  $\delta$  167.3, 150.1, 129.4, 128.3, 127.3, 83.2, 51.9, 31.4, 24.8, 24.5.

HRMS-(DART) for:  $^{12}\text{C}_{22}^1\text{H}_{34}^{10}\text{B}_2^{16}\text{O}_5[\text{M}+\text{H}]^+$ : calculated: 398.2664, found: 398.2665.

**Methyl 4-(2,2-bis(4,4,5,5-tetramethyl-1,3,2-dioxaborolan-2-yl)ethyl)benzoate (6c)**

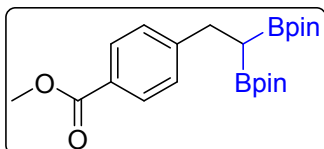

The reaction was performed following the general procedure A. White solid (mp: 183.2-184.8 °C), 80% yield (66.6 mg).  $^1\text{H}$  NMR (500 MHz,  $\text{CDCl}_3$ )  $\delta$  7.89 (d,  $J = 8.2$  Hz, 2H), 7.29 (d,  $J = 8.2$  Hz, 2H), 3.87 (s, 3H), 2.91 (d,  $J = 8.3$  Hz, 2H), 1.39 – 1.21 (m, 1H), 1.17 (s, 12H), 1.15 (s, 12H).  $^{13}\text{C}$  NMR (125 MHz,  $\text{CDCl}_3$ )  $\delta$  167.3, 150.1, 129.4, 128.3, 127.3, 83.2, 51.9, 31.4, 24.8, 24.5.

HRMS (ESI, m/z) calcd for  $^{12}\text{C}_{22}^1\text{H}_{34}^{10}\text{B}_2^{16}\text{O}_6[\text{M}+\text{Na}]^+$ : 437.2506; found: 437.2509.



**2,2'-(2-(4-(Methylsulfonyl)phenyl)ethane-1,1-diyl)bis(4,4,5,5-tetramethyl-1,3,2-dioxaborolane) (6d)**

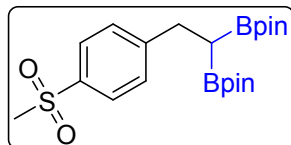

The reaction was performed following the general procedure A. White solid (mp: 177.2-178.3 °C), 80% yield (66.6 mg). <sup>1</sup>H NMR (500 MHz, CDCl<sub>3</sub>) δ 7.78 (d, *J* = 8.3 Hz, 2H), 7.41 (d, *J* = 8.3 Hz, 2H), 2.99 (s, 3H), 2.93 (d, *J* = 8.3 Hz, 2H), 1.16 (s, 12H), 1.15 (s, 12H), 1.12 (d, *J* = 8.4 Hz, 1H). <sup>13</sup>C NMR (125 MHz, CDCl<sub>3</sub>) δ 151.3, 137.6, 129.3, 127.1, 83.3, 44.6, 31.3, 24.8, 24.5.

HRMS (ESI, *m/z*) calcd for <sup>12</sup>C<sub>21</sub><sup>1</sup>H<sub>34</sub><sup>10</sup>B<sub>2</sub><sup>16</sup>O<sub>6</sub><sup>32</sup>S[M+Na]<sup>+</sup>: 457.2227; found: 457.2227.

**4-(2,2-Bis(4,4,5,5-tetramethyl-1,3,2-dioxaborolan-2-yl)propyl)benzonitrile (6e)**

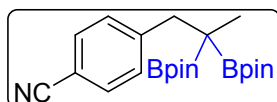

The reaction was performed following the general procedure A. White solid (mp: 177.2-178.3 °C), 84% yield (67.2 mg). <sup>1</sup>H NMR (500 MHz, CDCl<sub>3</sub>) δ 7.50 (d, *J* = 8.3 Hz, 2H), 7.35 (d, *J* = 8.2 Hz, 2H), 2.91 (s, 2H), 1.22 (s, 12H), 1.19 (s, 12H), 0.96 (s, 3H). <sup>13</sup>C NMR (125 MHz, CDCl<sub>3</sub>) δ 147.7, 131.4, 130.7, 119.3, 109.3, 83.4, 39.4, 24.8, 24.6, 15.8.

HRMS (ESI, *m/z*) calcd for <sup>12</sup>C<sub>22</sub><sup>1</sup>H<sub>33</sub><sup>10</sup>B<sub>2</sub><sup>16</sup>O<sub>4</sub><sup>14</sup>N[M+Na]<sup>+</sup>: 418.2561; found: 418.2563.

**1-(4-(2,2-Bis(4,4,5,5-tetramethyl-1,3,2-dioxaborolan-2-yl)propyl)phenyl)ethan-1-one (6f)**

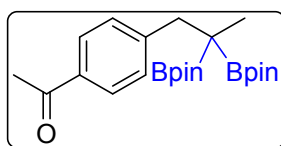

The reaction was performed following the general procedure A. White solid (mp: 177.0-178.6 °C), 90% yield (74.5 mg). <sup>1</sup>H NMR (500 MHz, CDCl<sub>3</sub>) δ 7.81 (d, *J* = 8.2 Hz, 2H), 7.33 (d, *J* = 8.2 Hz, 2H), 2.92 (s, 2H), 2.55 (s, 3H), 1.23 (s, 12H), 1.19 (s, 12H), 0.96 (s, 3H). <sup>13</sup>C NMR (125 MHz, CDCl<sub>3</sub>) δ 198.1, 147.9, 134.7, 130.0, 127.8, 83.3, 39.2, 26.5, 24.8, 24.6, 15.8.

HRMS (ESI, *m/z*) calcd for <sup>12</sup>C<sub>23</sub><sup>1</sup>H<sub>36</sub><sup>10</sup>B<sub>2</sub><sup>16</sup>O<sub>5</sub>[M+H]<sup>+</sup>: 413.2894; found: 413.2896.

**1-(4-(2,2-Bis(4,4,5,5-tetramethyl-1,3,2-dioxaborolan-2-yl)propyl)phenyl)propan-1-one (6g)**

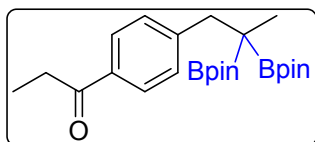

The reaction was performed following the general procedure A. White solid (mp: 169.2-171.3 °C), 87% yield (74.8 mg).  $^1\text{H}$  NMR (500 MHz,  $\text{CDCl}_3$ )  $\delta$  7.82 (d,  $J$  = 8.2 Hz, 2H), 7.32 (d,  $J$  = 8.2 Hz, 2H), 2.96 (q,  $J$  = 7.2 Hz, 2H), 2.91 (s, 2H), 1.23 (s, 12H), 1.21 – 1.17 (m, 15H), 0.96 (s, 3H).  $^{13}\text{C}$  NMR (125 MHz,  $\text{CDCl}_3$ )  $\delta$  200.7, 147.6, 134.4, 130.0, 127.5, 83.3, 39.2, 31.6, 24.8, 24.6, 15.8, 8.3. HRMS (ESI,  $m/z$ ) calcd for  $^{12}\text{C}_{24}^{1}\text{H}_{38}^{10}\text{B}_2^{16}\text{O}_5[\text{M}+\text{H}]^+$ : 427.3051; found: 427.3051.

**2,2'-(1-(4-(Methylsulfonyl)phenyl)propane-2,2-diyl)bis(4,4,5,5-tetramethyl-1,3,2-dioxaborolane) (6h)**

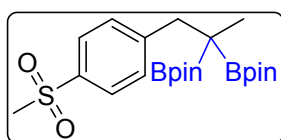

The reaction was performed following the general procedure A. White solid (mp: 188.2-190.3 °C), 90% yield (81.1 mg).  $^1\text{H}$  NMR (500 MHz,  $\text{CDCl}_3$ )  $\delta$  7.80 – 7.76 (m, 2H), 7.45 (d,  $J$  = 8.4 Hz, 2H), 3.02 (s, 3H), 2.95 (s, 2H), 1.23 (s, 12H), 1.20 (s, 12H), 0.97 (s, 3H).  $^{13}\text{C}$  NMR (125 MHz,  $\text{CDCl}_3$ )  $\delta$  148.8, 137.6, 130.8, 126.7, 83.4, 44.6, 39.2, 24.8, 24.7, 15.8. HRMS (ESI,  $m/z$ ) calcd for  $^{12}\text{C}_{22}^{1}\text{H}_{36}^{10}\text{B}_2^{16}\text{O}_6^{32}\text{S}[\text{M}+\text{Na}]^+$ : 471.2384; found: 471.2386.

**Ethyl 4-(2,2-bis(4,4,5,5-tetramethyl-1,3,2-dioxaborolan-2-yl)propyl)benzoate (6i)**

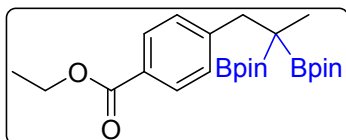

The reaction was performed following the general procedure A. White solid (mp: 168.2-169.3 °C), 88% yield (78.1 mg).  $^1\text{H}$  NMR (500 MHz,  $\text{CDCl}_3$ )  $\delta$  7.88 (d,  $J$  = 7.9 Hz, 2H), 7.31 (d,  $J$  = 8.0 Hz, 2H), 4.33 (q,  $J$  = 7.0 Hz, 2H), 2.91 (s, 2H), 1.36 (t,  $J$  = 7.0 Hz, 3H), 1.22 (s, 12H), 1.19 (s, 12H), 0.96 (s, 3H).  $^{13}\text{C}$  NMR (125 MHz,  $\text{CDCl}_3$ )  $\delta$  166.8, 147.4, 129.8, 128.9, 127.7, 83.2, 60.6, 39.2, 24.9, 24.8, 24.6, 15.8, 14.3. HRMS (ESI,  $m/z$ ) calcd for  $^{12}\text{C}_{24}^{1}\text{H}_{38}^{10}\text{B}_2^{16}\text{O}_6[\text{M}+\text{Na}]^+$ : 465.2819; found: 465.2824.

**Ethyl 3-(4-(2,2-bis(4,4,5,5-tetramethyl-1,3,2-dioxaborolan-2-yl)propyl)phenyl)-3-oxopropanoate (6j)**

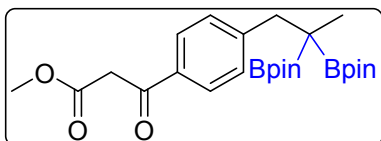

The reaction was performed following the general procedure A. White solid (mp: 168.2-169.3 °C), 85% yield (78.1 mg).  $^1\text{H}$  NMR (500 MHz,  $\text{CDCl}_3$ )  $\delta$  7.81 (d,  $J$  = 8.3

Hz, 2H), 7.34 (d,  $J = 8.3$  Hz, 2H), 2.93 (s, 2H), 2.56 (s, 3H), 1.25 (s, 2H), 1.23 (s, 12H), 1.20 (s, 12H), 0.97 (s, 3H).  $^{13}\text{C}$  NMR (125 MHz,  $\text{CDCl}_3$ )  $\delta$  198.1, 147.9, 134.8, 130.1, 127.8, 83.3, 39.2, 29.7, 26.5, 24.8, 24.7, 15.8.  
HRMS (ESI,  $m/z$ ) calcd for  $^{12}\text{C}_{25}\text{H}_{38}^{10}\text{B}_2^{16}\text{O}_7[\text{M}+\text{Na}]^+$ : 473.2874; found: 473.2876.

**2,2'-(2-(4-(trifluoromethyl)phenyl)ethane-1,1-diyl)bis(4,4,5,5-tetramethyl-1,3,2-dioxaborolane)(6k)**

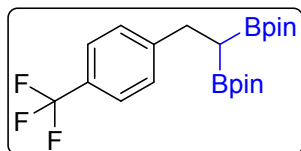

The reaction was performed following the general procedure A. Colorless oil, 24% yield (20.3 mg).  $^1\text{H}$  NMR (500 MHz,  $\text{CDCl}_3$ )  $\delta$  7.47 (d,  $J = 8.1$  Hz, 2H), 7.34 (d,  $J = 8.1$  Hz, 2H), 2.92 (d,  $J = 8.4$  Hz, 2H), 1.28 (t,  $J = 2.9$  Hz, 1H), 1.18 (s, 12H), 1.16 (s, 12H).  $^{13}\text{C}$  NMR (125 MHz,  $\text{CDCl}_3$ )  $\delta$  148.6 (d,  $J = 1.2$  Hz), 128.6, 127.1, 125.5, 124.9 (q,  $J = 3.8$  Hz), 83.3, 31.2, 24.80, 24.77, 24.5.  
HRMS (ESI,  $m/z$ ) calcd for  $^{12}\text{C}_{21}\text{H}_{31}^{11}\text{B}_2^{16}\text{O}_4^{18}\text{F}_3[\text{M}+\text{H}]^+$ : 427.2442; found: 427.2433.

**2,2',2''-(2-(4-(trifluoromethyl)phenyl)ethane-1,1,2-triyl)tris(4,4,5,5-tetramethyl-1,3,2-dioxaborolane)(6'a)**

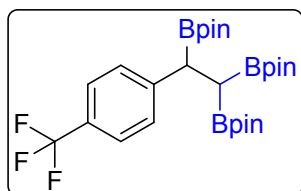

The reaction was performed following the general procedure A. Colorless oil, 64% yield (62.3 mg).  $^1\text{H}$  NMR (500 MHz,  $\text{CDCl}_3$ )  $\delta$  7.42 (d,  $J = 8.1$  Hz, 2H), 7.31 (d,  $J = 8.1$  Hz, 2H), 2.74 (d,  $J = 12.6$  Hz, 1H), 1.44 (d,  $J = 12.6$  Hz, 1H), 1.23 (d,  $J = 5.5$  Hz, 12H), 1.14 (d,  $J = 8.6$  Hz, 12H), 0.92 (d,  $J = 20.6$  Hz, 12H).  $^{13}\text{C}$  NMR (125 MHz,  $\text{CDCl}_3$ )  $\delta$  149.92, 128.6, 127.1, 124.71 (q,  $J = 3.7$  Hz), 83.2, 83.1, 82.8, 31.6, 25.0, 24.81, 24.80, 24.6, 24.4, 24.22, 24.20, 22.6.  
HRMS(ESI,  $m/z$ ) calcd for  $^{12}\text{C}_{27}\text{H}_{42}^{11}\text{B}_3^{16}\text{O}_6^{18}\text{F}_3[\text{M}+\text{Na}]^+$ : 575.3104; found: 575.3105.

**2,2',2''-(2-(4-fluorophenyl)ethane-1,1,2-triyl)tris(4,4,5,5-tetramethyl-1,3,2-dioxaborolane)(6'b)**

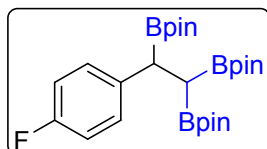

The reaction was performed following the general procedure A. Colorless oil, 80% yield (81.2 mg).  $^1\text{H}$  NMR (500 MHz,  $\text{CDCl}_3$ )  $\delta$  7.15 (dd,  $J = 8.7, 5.6$  Hz, 2H), 6.86 (t,

$J = 8.8$  Hz, 2H), 2.64 (d,  $J = 12.8$  Hz, 1H), 1.42 – 1.37 (m, 1H), 1.23 (d,  $J = 6.0$  Hz, 12H), 1.13 (d,  $J = 9.1$  Hz, 12H), 0.95 (d,  $J = 12.4$  Hz, 12H).  $^{13}\text{C}$  NMR (125 MHz,  $\text{CDCl}_3$ )  $\delta$  161.7, 159.8, 140.9, 129.7, 114.5, 114.4, 83.1, 83.0, 82.7, 25.0, 24.82, 24.80, 24.6, 24.5, 24.4, 24.2.

HRMS-(DART) for:  $^{12}\text{C}_{26}^{1}\text{H}_{42}^{10}\text{B}_3^{18}\text{F}^{16}\text{O}_6[\text{M}+\text{H}]^+$ : calculated: 500.3426, found: 500.3425.

**2,2',2''-(2-(4-bromophenyl)ethane-1,1,2-triyl)tris(4,4,5,5-tetramethyl-1,3,2-dioxaborolane)(6'c)**

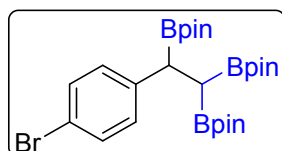

The reaction was performed following the general procedure A. Colorless oil, 84% yield (84.3 mg).  $^1\text{H}$  NMR (500 MHz,  $\text{CDCl}_3$ )  $\delta$  7.29 (d,  $J = 8.4$  Hz, 2H), 7.09 (d,  $J = 8.4$  Hz, 2H), 2.63 (d,  $J = 12.7$  Hz, 1H), 1.27 (d,  $J = 6.6$  Hz, 1H), 1.23 (d,  $J = 5.5$  Hz, 12H), 1.14 (d,  $J = 7.5$  Hz, 12H), 0.96 (d,  $J = 16.7$  Hz, 12H).  $^{13}\text{C}$  NMR (125 MHz,  $\text{CDCl}_3$ )  $\delta$  144.5, 130.8, 130.2, 118.3, 83.2, 83.1, 82.8, 25.0, 24.82, 24.80, 24.6, 24.5, 24.3, 24.2.

HRMS(ESI,m/z) calcd for  $^{12}\text{C}_{26}^{1}\text{H}_{42}^{11}\text{B}_3^{16}\text{O}_6^{80}\text{Br}[\text{M}+\text{Na}]^+$ : 563.2526; found: 563.2517.

**3-(1,2,2-tris(4,4,5,5-tetramethyl-1,3,2-dioxaborolan-2-yl)ethyl)benzonitrile (6'd)**

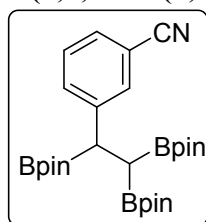

The reaction was performed following the general procedure A. Colorless oil, 62% yield.  $^1\text{H}$  NMR (500 MHz,  $\text{CDCl}_3$ )  $\delta$  7.52 (s, 1H), 7.46 – 7.42 (m, 1H), 7.35 (dt,  $J = 7.5, 1.2$  Hz, 1H), 7.27 (dd,  $J = 10.5, 4.9$  Hz, 1H), 2.71 (d,  $J = 12.5$  Hz, 1H), 1.41 – 1.35 (m, 1H), 1.23 (d,  $J = 4.4$  Hz, 12H), 1.14 (d,  $J = 8.9$  Hz, 12H), 0.97 (s, 6H), 0.93 (s, 6H).  $^{13}\text{C}$  NMR (125 MHz,  $\text{CDCl}_3$ )  $\delta$  147.2, 133.0, 132.2, 128.61, 128.55, 119.34, 111.6, 83.5, 83.3, 82.9, 24.8, 24.7, 24.6, 24.5, 24.3.

HRMS(ESI,m/z) calcd for  $^{12}\text{C}_{27}^{1}\text{H}_{42}^{11}\text{B}_3^{14}\text{N}^{16}\text{O}_6^{23}\text{Na}[\text{M}+\text{Na}]^+$ : 532.3184; found: 532.3191.

**2-(2,2-bis(4,4,5,5-tetramethyl-1,3,2-dioxaborolan-2-yl)ethyl)benzo[d]oxazole (6l)<sup>15</sup>**

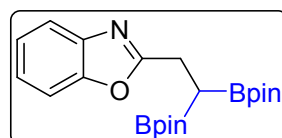

The reaction was performed following the general procedure A. Colorless oil, 87% yield (69.6 mg).  $^1\text{H}$  NMR (500 MHz,  $\text{CDCl}_3$ )  $\delta$  7.63 – 7.59 (m, 1H), 7.43 – 7.39 (m,

1H), 7.25 – 7.21 (m, 2H), 3.16 (d,  $J = 8.2$  Hz, 2H), 1.40 (t,  $J = 8.1$  Hz, 1H), 1.23 (s, 12H), 1.19 (s, 12H).  $^{13}\text{C}$  NMR (125 MHz,  $\text{CDCl}_3$ )  $\delta$  168.8, 150.8, 141.4, 123.9, 123.7, 119.4, 110.1, 83.4, 24.8, 24.4.

## 2-(2,2-bis(4,4,5,5-tetramethyl-1,3,2-dioxaborolan-2-yl)ethyl)benzo[d]thiazole

(6m)<sup>15</sup>

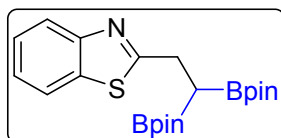

The reaction was performed following the general procedure A. Colorless oil, 72% yield (59.8 mg).  $^1\text{H}$  NMR (500 MHz,  $\text{CDCl}_3$ )  $\delta$  7.91 (d,  $J = 8.1$  Hz, 1H), 7.80 (d,  $J = 7.9$  Hz, 1H), 7.39 (t,  $J = 7.7$  Hz, 1H), 7.30 (t,  $J = 7.6$  Hz, 1H), 3.36 (d,  $J = 8.0$  Hz, 2H), 1.43 (t,  $J = 7.9$  Hz, 1H), 1.24 (s, 12H), 1.20 (s, 12H).  $^{13}\text{C}$  NMR (125 MHz,  $\text{CDCl}_3$ )  $\delta$  173.9, 153.1, 135.4, 125.5, 124.2, 122.4, 121.4, 83.4, 30.34, 24.8, 24.5.

## 4,4,5,5-tetramethyl-2-(1-(4-(methylsulfonyl)phenyl)hex-1-en-2-yl)-1,3,2-dioxaborolane (6n)

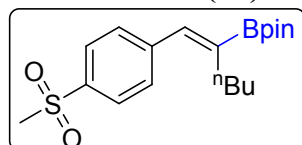

$^1\text{H}$  NMR (500 MHz,  $\text{CDCl}_3$ )  $\delta$  7.88 (d,  $J = 8.4$  Hz, 2H), 7.45 (d,  $J = 8.3$  Hz, 2H), 7.18 (s, 1H), 3.05 (s, 3H), 2.34 – 2.29 (m, 2H), 1.48 – 1.39 (m, 3H), 1.29 (s, 12H), 1.26 (dd,  $J = 7.1, 3.7$  Hz, 1H), 0.85 (t,  $J = 7.3$  Hz, 3H).  $^{13}\text{C}$  NMR (125 MHz,  $\text{CDCl}_3$ )  $\delta$  143.6, 139.2, 138.4, 129.5, 127.1, 83.6, 44.5, 31.9, 29.2, 26.8, 24.9, 24.7, 22.7, 13.9.

HRMS(ESI,  $m/z$ ) calcd for  $^{12}\text{C}_{19}^{1}\text{H}_{30}^{11}\text{B}^{16}\text{O}_4^{32}\text{S}[\text{M}+\text{H}]^+$ : 365.1952; found: 365.1951.

## 4,4,5,5-tetramethyl-2-(1-(4-(methylsulfonyl)phenyl)-5-phenylpent-1-en-2-yl)-1,3,2-dioxaborolane (6o)

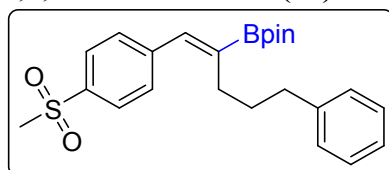

$^1\text{H}$  NMR (500 MHz,  $\text{CDCl}_3$ )  $\delta$  7.79 (d,  $J = 8.4$  Hz, 2H), 7.33 (d,  $J = 8.2$  Hz, 2H), 7.26 (t,  $J = 7.3$  Hz, 2H), 7.19 (dd,  $J = 13.2, 5.8$  Hz, 2H), 7.14 (d,  $J = 6.9$  Hz, 2H), 3.05 (s, 3H), 2.62 (t,  $J = 7.5$  Hz, 2H), 2.40 – 2.35 (m, 2H), 1.85 – 1.78 (m, 2H), 1.31 (s, 12H).  $^{13}\text{C}$  NMR (125 MHz,  $\text{CDCl}_3$ )  $\delta$  143.1, 142.0, 139.6, 138.4, 129.3, 128.3, 128.1, 127.0, 125.6, 83.6, 44.2, 35.6, 31.1, 28.8, 24.6, 20.8.

HRMS(ESI,  $m/z$ ) calcd for  $^{12}\text{C}_{24}^{1}\text{H}_{31}^{11}\text{BNa}^{16}\text{O}_4^{32}\text{S}[\text{M}+\text{Na}]^+$ : 449.1928; found: 449.1926.

## ethyl 4-(2-(4,4,5,5-tetramethyl-1,3,2-dioxaborolan-2-yl)pent-1-en-1-yl)benzoate (6p)

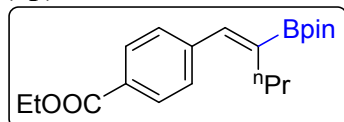

$^1\text{H}$  NMR (500 MHz,  $\text{CDCl}_3$ )  $\delta$  8.00 (d,  $J$  = 8.3 Hz, 2H), 7.36 (d,  $J$  = 8.2 Hz, 2H), 7.23 (s, 1H), 4.38 – 4.34 (m, 2H), 2.35 – 2.31 (m, 2H), 1.49 (dd,  $J$  = 15.3, 7.6 Hz, 2H), 1.38 (t,  $J$  = 7.1 Hz, 3H), 1.30 (s, 12H), 0.90 (t,  $J$  = 7.4 Hz, 3H).  $^{13}\text{C}$  NMR (125 MHz,  $\text{CDCl}_3$ )  $\delta$  166.5, 142.6, 140.7, 134.6, 129.3, 128.8, 83.5, 60.9, 31.7, 24.8, 23.2, 14.3, 14.2.

HRMS(ESI,  $m/z$ ) calcd for  $^{12}\text{C}_{20}^{1}\text{H}_{29}^{11}\text{BNa}^{16}\text{O}_4[\text{M}+\text{Na}]^+$ : 367.2051; found: 367.2054.

**((3a*S*,5*S*,5a*R*,8a*R*,8b*S*)-2,2,7,7-tetramethyltetrahydro-5*H*-bis([1,3]dioxolo)[4,5-*b*:4',5'-*d*]pyran-5-yl)methyl 4-(2,2-bis(4,4,5,5-tetramethyl-1,3,2-dioxaborolan-2-yl)propyl)benzoate (6q)**

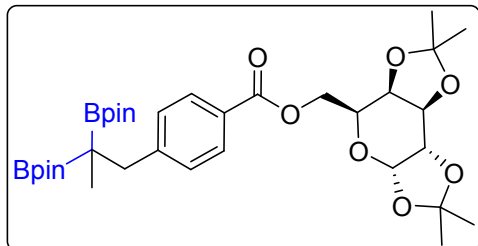

The reaction was performed following the general procedure A. Colorless oil, 84% yield (101.6 mg).  $^1\text{H}$  NMR (500 MHz,  $\text{CDCl}_3$ )  $\delta$  7.89 (d,  $J$  = 8.3 Hz, 2H), 7.31 (d,  $J$  = 8.3 Hz, 2H), 5.55 (d,  $J$  = 4.9 Hz, 1H), 4.64 (dd,  $J$  = 7.9, 2.5 Hz, 1H), 4.50 (dd,  $J$  = 11.4, 5.1 Hz, 1H), 4.38 (dd,  $J$  = 11.4, 7.4 Hz, 1H), 4.35 – 4.30 (m, 2H), 4.16 (ddd,  $J$  = 7.0, 5.1, 1.7 Hz, 1H), 2.91 (s, 2H), 1.50 (s, 3H), 1.46 (s, 3H), 1.34 (s, 3H), 1.32 (s, 3H), 1.23 (s, 12H), 1.19 (s, 12H), 0.96 (s, 3H).  $^{13}\text{C}$  NMR (125 MHz,  $\text{CDCl}_3$ )  $\delta$  170.9, 147.6, 129.8, 129.0, 109.5, 108.7, 96.2, 83.2, 71.0, 70.6, 66.1, 63.5, 60.3, 25.8, 24.8, 24.7, 24.5, 24.4, 20.9, 15.7, 14.1.

HRMS (ESI,  $m/z$ ) calcd for  $^{12}\text{C}_{34}^{1}\text{H}_{52}^{10}\text{B}_2^{16}\text{O}_{11}[\text{M}+\text{H}]^+$ : 657.3841; found: 657.3841.

**2-((1*S*,4*R*)-7,7-dimethylbicyclo[2.2.1]hept-2-en-2-yl)ethyl 4-(2,2-bis(4,4,5,5-tetramethyl-1,3,2-dioxaborolan-2-yl)propyl)benzoate (6r)**

**4-(2,2-bis(4,4,5,5-tetramethyl-1,3,2-dioxaborolan-2-yl)propyl)benzoate (6r)**

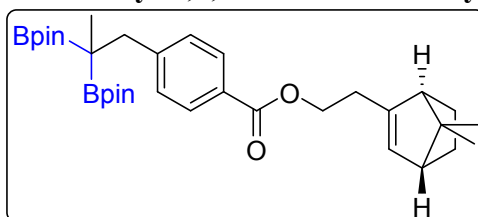

The reaction was performed following the general procedure A. Colorless oil, 80% yield (89.6 mg).  $^1\text{H}$  NMR (500 MHz,  $\text{CDCl}_3$ )  $\delta$  7.87 (d,  $J$  = 8.3 Hz, 2H), 7.31 (d,  $J$  = 8.3 Hz, 2H), 5.36 – 5.33 (m, 1H), 4.32 – 4.26 (m, 2H), 2.92 (s, 2H), 2.40 (dd,  $J$  = 11.8, 5.0 Hz, 2H), 2.38 – 2.34 (m, 1H), 2.21 (t,  $J$  = 17.2 Hz, 2H), 2.11 (t,  $J$  = 6.3 Hz, 1H), 2.09 – 2.06 (m, 1H), 1.33 (s, 1H), 1.26 (s, 3H), 1.23 (s, 12H), 1.19 (s, 12H), 0.98 (s, 3H), 0.82 (s, 3H).  $^{13}\text{C}$  NMR (125 MHz,  $\text{CDCl}_3$ )  $\delta$  129.5, 128.5, 118.4, 82.8, 62.6, 45.4, 40.4, 38.9, 35.7, 31.2, 30.9, 25.8, 24.4, 24.2, 20.7, 20.4, 15.5, 13.7.

HRMS (ESI,  $m/z$ ) calcd for  $^{12}\text{C}_{33}^{1}\text{H}_{50}^{10}\text{B}_2^{16}\text{O}_6[\text{M}+\text{Na}]^+$ : 585.3758; found: 585.3757.

**(*E*)-3,7-dimethylocta-2,6-dien-1-yl 4-(2,2-bis(4,4,5,5-tetramethyl-1,3,2-dioxaborolan-2-yl)ethyl)benzoate (6s)**

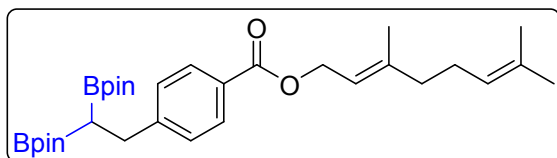

The reaction was performed following the general procedure A. Colorless oil, 62% yield (66.9 mg).  $^1\text{H}$  NMR (500 MHz,  $\text{CDCl}_3$ )  $\delta$  7.88 (d,  $J$  = 8.2 Hz, 2H), 7.28 (d,  $J$  = 8.2 Hz, 2H), 5.43 (t,  $J$  = 7.2 Hz, 1H), 5.08 (t,  $J$  = 6.4 Hz, 1H), 4.08 (d,  $J$  = 7.2 Hz, 2H), 3.86 (s, 3H), 2.90 (d,  $J$  = 8.3 Hz, 2H), 2.09 – 2.04 (m, 4H), 1.73 (s, 3H), 1.59 (s, 3H), 1.37 – 1.31 (m, 1H), 1.16 (s, 12H), 1.15 (s, 12H).  $^{13}\text{C}$  NMR (125 MHz,  $\text{CDCl}_3$ )  $\delta$  167.3, 150.1, 139.9, 129.4, 128.3, 127.3, 124.4, 123.8, 83.5, 83.2, 58.9, 51.9, 31.9, 31.4, 26.5, 25.6, 24.9, 24.7, 24.5, 23.4, 17.6.

HRMS (ESI,  $m/z$ ) calcd for  $^{12}\text{C}_{31}^{1}\text{H}_{48}^{10}\text{B}_2^{16}\text{O}_6[\text{M}+\text{Na}]^+$ : 561.3527; found: 561.3529.

**(1R,2S,5R)-2-isopropyl-5-methylcyclohexyl4-(2,2-bis(4,4,5,5-tetramethyl-1,3,2-dioxaborolan-2-yl)propyl)benzoate (6t)**

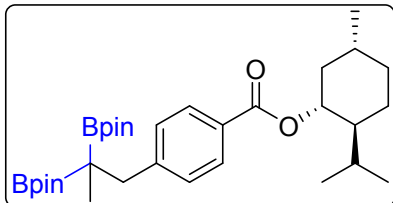

The reaction was performed following the general procedure A. Colorless oil, 65% yield (76.7 mg).  $^1\text{H}$  NMR (500 MHz,  $\text{CDCl}_3$ )  $\delta$  7.88 (d,  $J$  = 8.3 Hz, 2H), 7.31 (d,  $J$  = 8.3 Hz, 2H), 4.90 (td,  $J$  = 10.9, 4.4 Hz, 1H), 2.95 – 2.89 (m, 2H), 2.10 (d,  $J$  = 11.7 Hz, 1H), 1.98 – 1.91 (m, 1H), 1.73 – 1.69 (m, 2H), 1.53 (t,  $J$  = 11.7 Hz, 2H), 1.33 (s, 1H), 1.24 (s, 12H), 1.20 (s, 12H), 1.10 (dd,  $J$  = 21.8, 9.9 Hz, 2H), 0.97 (s, 3H), 0.90 (t,  $J$  = 6.4 Hz, 6H), 0.77 (d,  $J$  = 6.9 Hz, 3H).  $^{13}\text{C}$  NMR (125 MHz,  $\text{CDCl}_3$ )  $\delta$  165.6, 146.9, 129.4, 128.5, 127.7, 82.7, 73.8, 46.9, 40.6, 38.7, 33.9, 30.9, 26.0, 24.3, 24.1, 23.2, 21.4, 15.9, 15.2.

HRMS (ESI,  $m/z$ ) calcd for  $^{12}\text{C}_{32}^{1}\text{H}_{52}^{10}\text{B}_2^{16}\text{O}_6[\text{M}+\text{Na}]^+$ : 575.3915; found: 575.3914.

**(3S,8R,9S,10R,13S,14S)-10,13-dimethyl-17-oxo2,3,4,7,8,9,10,11,12,13,14,15,16,17-tetradecahydro-1H-cyclopenta[a]phenanthren-3-yl4-(2,2-bis(4,4,5,5-tetramethyl-1,3,2-dioxaborolan-2-yl)propyl)benzoate (6u)**

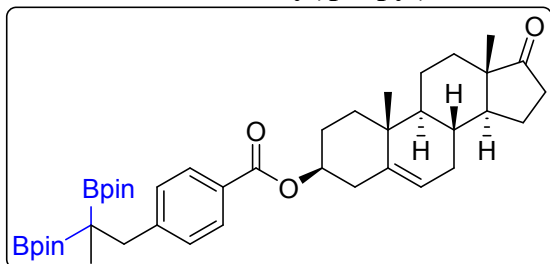

The reaction was performed following the general procedure A. Colorless oil, 74% yield (102.1 mg).  $^1\text{H}$  NMR (500 MHz,  $\text{CDCl}_3$ )  $\delta$  7.88 (d,  $J$  = 8.2 Hz, 2H), 7.31 (d,  $J$  = 8.2 Hz, 2H), 5.44 (d,  $J$  = 5.0 Hz, 1H), 4.83 (dq,  $J$  = 16.3, 5.3 Hz, 1H), 2.92 (s, 2H), 2.46 (dd,  $J$  = 18.9, 9.3 Hz, 3H), 2.14 – 2.05 (m, 2H), 1.95 (ddd,  $J$  = 17.2, 14.8, 7.0 Hz, 3H), 1.87 – 1.83 (m, 1H), 1.78 – 1.63 (m, 6H), 1.52 (ddd,  $J$  = 16.7, 12.8, 3.7 Hz, 2H), 1.23 (s, 12H), 1.20 (s, 12H), 1.08 (s, 3H), 0.96 (s, 3H), 0.89 (s, 3H).  $^{13}\text{C}$  NMR (125 MHz,  $\text{CDCl}_3$ )  $\delta$  171.1, 166.2, 147.4, 140.0, 129.8, 128.9, 128.0, 121.8, 83.2, 73.9,

60.3, 51.7, 50.1, 47.5, 39.2, 38.2, 36.9, 36.8, 35.8, 31.4, 30.8, 27.8, 24.7, 24.6, 21.9, 20.9, 20.3, 19.4, 15.8, 14.2, 13.5.

HRMS (ESI, m/z) calcd for  $^{12}\text{C}_{41}\text{H}_{60}^{10}\text{B}_2^{16}\text{O}_7[\text{M}+\text{Na}]^+$ : 707.4490; found: 707.4491.

**(3S,8S,9S,10R,13R,14S,17R)-10,13-dimethyl-17-((R)-6-methylheptan-2-yl)-2,3,4,7,8,9,10,11,12,13,14,15,16,17-tetradecahydro-1Hcyclopenta[a]phenanthren-3-yl 4-(2,2-bis(4,4,5,5-tetramethyl-1,3,2-dioxaborolan-2-yl)propyl)benzoate (6v)**

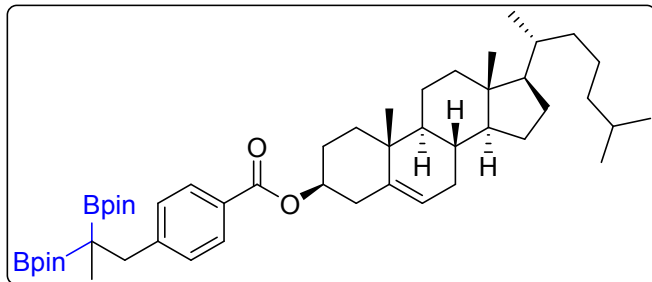

The reaction was performed following the general procedure A. Colorless oil, 74% yield (102.1 mg).  $^1\text{H}$  NMR (500 MHz,  $\text{CDCl}_3$ )  $\delta$  7.89 (d,  $J$  = 8.3 Hz, 2H), 7.31 (d,  $J$  = 8.3 Hz, 2H), 5.41 (d,  $J$  = 3.6 Hz, 1H), 4.87 – 4.79 (m, 1H), 2.92 (s, 2H), 2.44 (d,  $J$  = 7.7 Hz, 2H), 1.98 (d,  $J$  = 17.1 Hz, 3H), 1.93 – 1.69 (m, 4H), 1.57 – 1.43 (m, 6H), 1.36 – 1.31 (m, 4H), 1.24 (s, 12H), 1.20 (s, 12H), 1.17 – 1.08 (m, 6H), 1.06 (s, 3H), 1.01 (dd,  $J$  = 16.9, 6.4 Hz, 3H), 0.96 (s, 3H), 0.92 (d,  $J$  = 6.5 Hz, 3H), 0.86 (dd,  $J$  = 6.6, 2.3 Hz, 6H), 0.68 (s, 3H).  $^{13}\text{C}$  NMR (125 MHz,  $\text{CDCl}_3$ )  $\delta$  171.1, 166.2, 147.3, 139.8, 129.8, 128.9, 122.6, 83.3, 74.2, 60.4, 56.7, 56.1, 50.0, 42.3, 39.5, 38.2, 37.1, 36.7, 36.2, 35.8, 31.9, 28.2, 28.0, 24.8, 24.3, 23.8, 22.8, 22.6, 21.0, 19.4, 18.7, 15.8, 14.2, 11.9.

HRMS (ESI, m/z) calcd for  $^{12}\text{C}_{49}\text{H}_{78}^{10}\text{B}_2^{16}\text{O}_6[\text{M}+\text{Na}]^+$ : 807.5873; found: 807.5877.

**1-(4-(2-(4,4,5,5-tetramethyl-1,3,2-dioxaborolanyl)propyl)phenyl)ethan-1-one (8)**

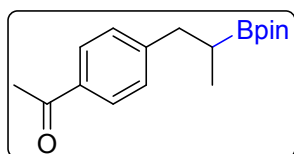

The reaction was performed following the general procedure (2). Colorless oil, 88% yield (50.7 mg).  $^1\text{H}$  NMR (500 MHz,  $\text{CDCl}_3$ )  $\delta$  7.85 (d,  $J$  = 8.3 Hz, 2H), 7.28 (d,  $J$  = 8.3 Hz, 2H), 2.85 (dd,  $J$  = 13.6, 7.6 Hz, 1H), 2.63 – 2.58 (m, 1H), 2.57 (s, 3H), 1.38 (dd,  $J$  = 15.3, 7.6 Hz, 1H), 1.18 (d,  $J$  = 2.6 Hz, 12H), 0.96 (d,  $J$  = 7.4 Hz, 3H).  $^{13}\text{C}$  NMR (125 MHz,  $\text{CDCl}_3$ )  $\delta$  197.9, 148.4, 134.9, 129.1, 128.2, 83.1, 38.9, 26.5, 24.7, 24.7, 15.2.

HRMS (ESI, m/z) calcd for  $^{12}\text{C}_{17}\text{H}_{25}^{10}\text{B}^{16}\text{O}_3[\text{M}+\text{H}]^+$ : 289.1974; found: 289.1970.

**1-(4-(2,2-difluoropropyl)phenyl)ethan-1-one (7) (CAS: No. 1785555-40-9)**

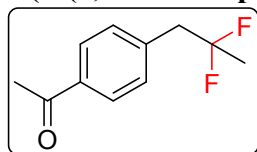

The reaction was performed following the general procedure (1). Colorless oil, 45% yield (17.8 mg).  $^1\text{H}$  NMR (500 MHz,  $\text{CDCl}_3$ )  $\delta$  7.92 (d,  $J$  = 8.3 Hz, 2H), 7.37 (d,  $J$  =



8.1 Hz, 2H), 3.20 (t,  $J = 15.5$  Hz, 2H), 2.60 (s, 3H), 1.55 (t,  $J = 18.3$  Hz, 3H).  $^{13}\text{C}$  NMR (125 MHz,  $\text{CDCl}_3$ )  $\delta$  197.8, 139.0, 136.2, 130.5, 128.4, 122.9 (t,  $J = 240.0$  Hz), 44.3 (t,  $J = 26.5$  Hz), 26.6, 23.0 (t,  $J = 27.4$  Hz).  $^{19}\text{F}$  NMR (471 MHz,  $\text{CDCl}_3$ )  $\delta$  -89.07. HRMS (ESI,  $m/z$ ) calcd for  $^{12}\text{C}_{11}\text{H}_{13}^{19}\text{F}_2^{16}\text{O}[\text{M}+\text{H}]^+$ : 199.0929; found: 199.0932.

### 1-(4-(2-(6-phenylpyridin-2-yl)propyl)phenyl)ethan-1-one (9)

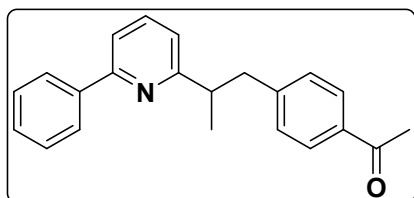

The reaction was performed following the general procedure (3). Colorless oil, 74% yield (46.6 mg).  $^1\text{H}$  NMR (500 MHz,  $\text{CDCl}_3$ )  $\delta$  9.21 (d,  $J = 2.1$  Hz, 1H), 8.41 (d,  $J = 2.1$  Hz, 1H), 8.21 (d,  $J = 8.5$  Hz, 1H), 8.12 (d,  $J = 8.5$  Hz, 2H), 8.06 (d,  $J = 8.5$  Hz, 1H), 7.93 (d,  $J = 8.1$  Hz, 1H), 7.83 (d,  $J = 8.5$  Hz, 2H), 7.79 (ddd,  $J = 8.4, 6.9, 1.4$  Hz, 1H), 7.72 (d,  $J = 8.6$  Hz, 1H), 7.65 – 7.62 (m, 1H), 2.67 (s, 3H), 2.65 (s, 1H), 1.33 (s, 1H), 1.28 (s, 1H), 1.25 (s, 3H).  $^{13}\text{C}$  NMR (125 MHz,  $\text{CDCl}_3$ )  $\delta$  197.5, 148.9, 142.1, 136.6, 134.4, 132.6, 130.3, 129.6, 128.9, 128.8, 128.2, 127.5, 127.4, 31.4, 30.2, 29.7, 26.7.

HRMS (ESI,  $m/z$ ) calcd for  $^{12}\text{C}_{22}\text{H}_{22}^{14}\text{N}^{16}\text{O}[\text{M}+\text{H}]^+$ : 316.1696; found: 316.1695.

### 4,4,5,5-tetramethyl-2-(1-(4-(methylsulfonyl)phenyl)prop-1-en-2-yl)-1,3,2-dioxaborolane (B-1)

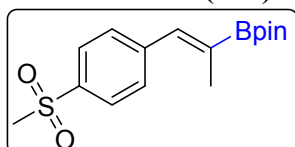

The reaction was performed following the general procedure (8). Colorless oil, 94% yield (60.5 mg).  $^1\text{H}$  NMR (500 MHz,  $\text{CDCl}_3$ )  $\delta$  7.88 (d,  $J = 8.4$  Hz, 2H), 7.50 (d,  $J = 8.4$  Hz, 2H), 7.21 (s, 1H), 3.05 (s, 3H), 1.96 (d,  $J = 1.6$  Hz, 3H), 1.29 (s, 12H).  $^{13}\text{C}$  NMR (125 MHz,  $\text{CDCl}_3$ )  $\delta$  143.3, 139.9, 138.4, 132.6, 129.9, 127.1, 83.8, 44.4, 24.8, 15.9.

HRMS(ESI, $m/z$ ) calcd for  $^{12}\text{C}_{16}\text{H}_{24}^{11}\text{B}^{16}\text{O}_4^{32}\text{S}[\text{M}+\text{H}]^+$ : 323.1483; found: 323.1482.

### Ethyl (E)-3-(4,4,5,5-tetramethyl-1,3,2-dioxaborolan-2-yl)acrylate (B-2) (CAS: No. 1009307-13-4)<sup>13</sup>

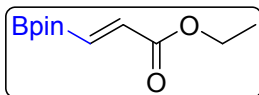

The reaction was performed following the general procedure (8). Colorless oil, 89% yield (40.1 mg).  $^1\text{H}$  NMR (500 MHz,  $\text{CDCl}_3$ )  $\delta$  6.76 (d,  $J = 18.2$  Hz, 1H), 6.61 (d,  $J = 18.2$  Hz, 1H), 4.20 (q,  $J = 7.1$  Hz, 2H), 1.27 (s, 12H), 1.25 (s, 3H).  $^{13}\text{C}$  NMR (125 MHz,  $\text{CDCl}_3$ )  $\delta$  165.9, 138.7, 83.9, 60.6, 24.9, 24.7, 14.1.

## 10. NMR spectrum

Ethyl 3,3-bis(4,4,5,5-tetramethyl-1,3,2-dioxaborolan-2-yl)propanoate (3a)

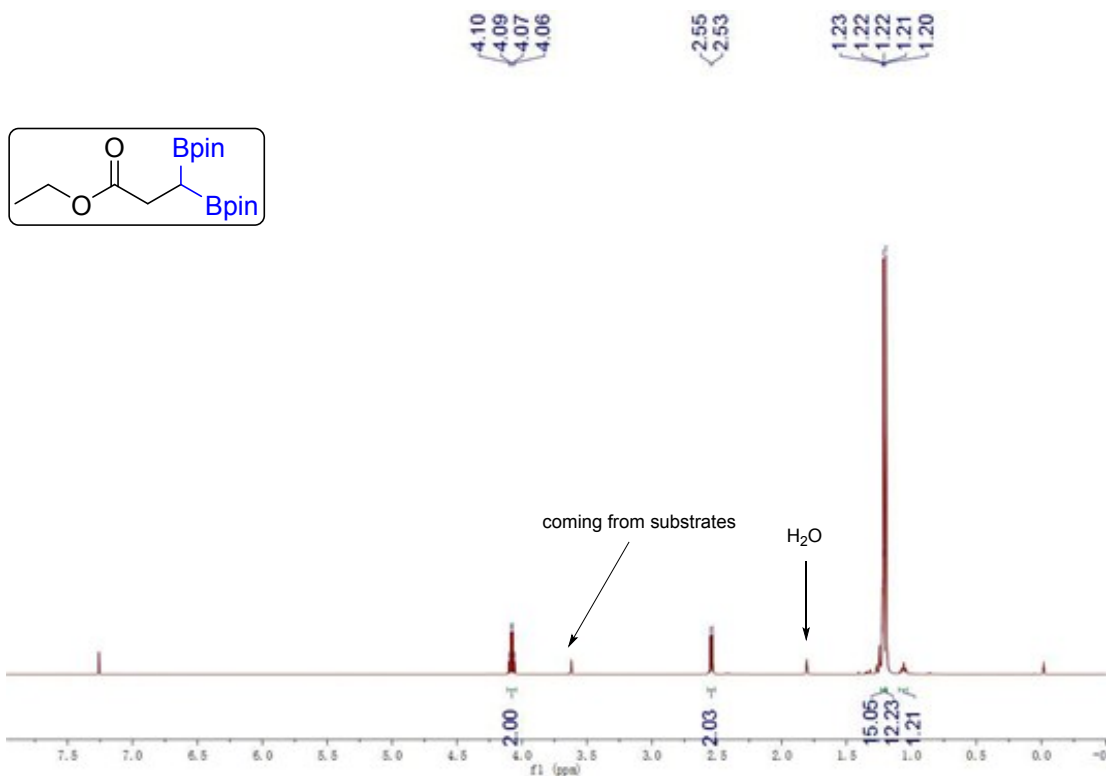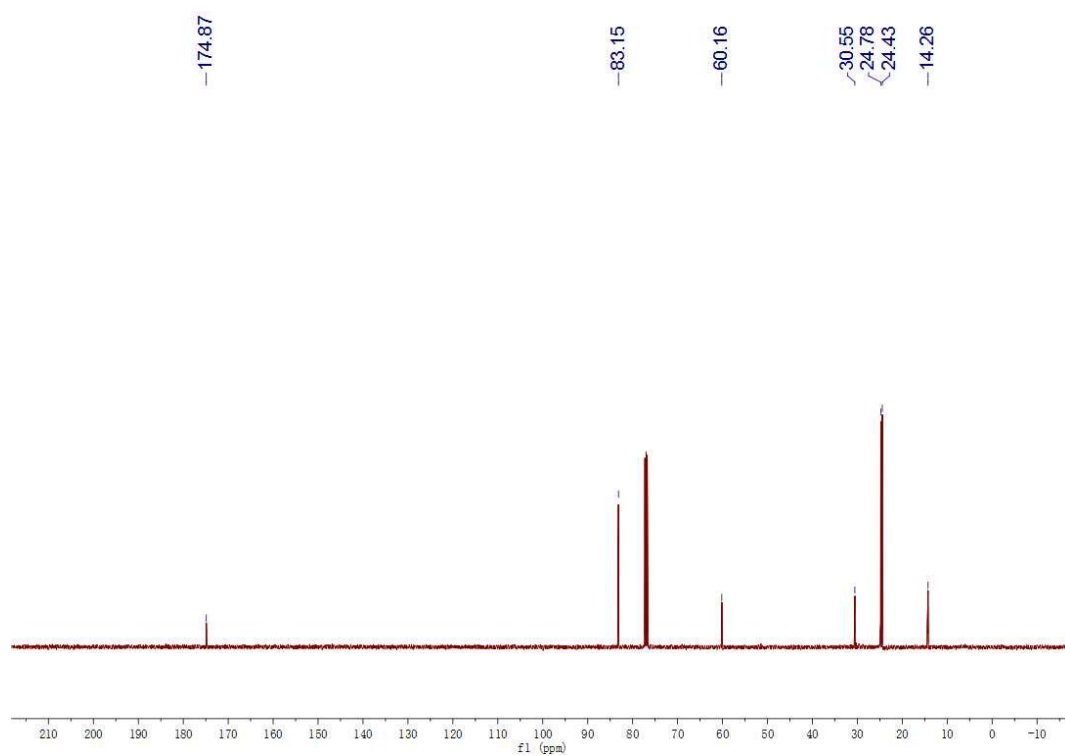

**Methyl 3,3-bis(4,4,5,5-tetramethyl-1,3,2-dioxaborolan-2-yl)propanoate (3b)**

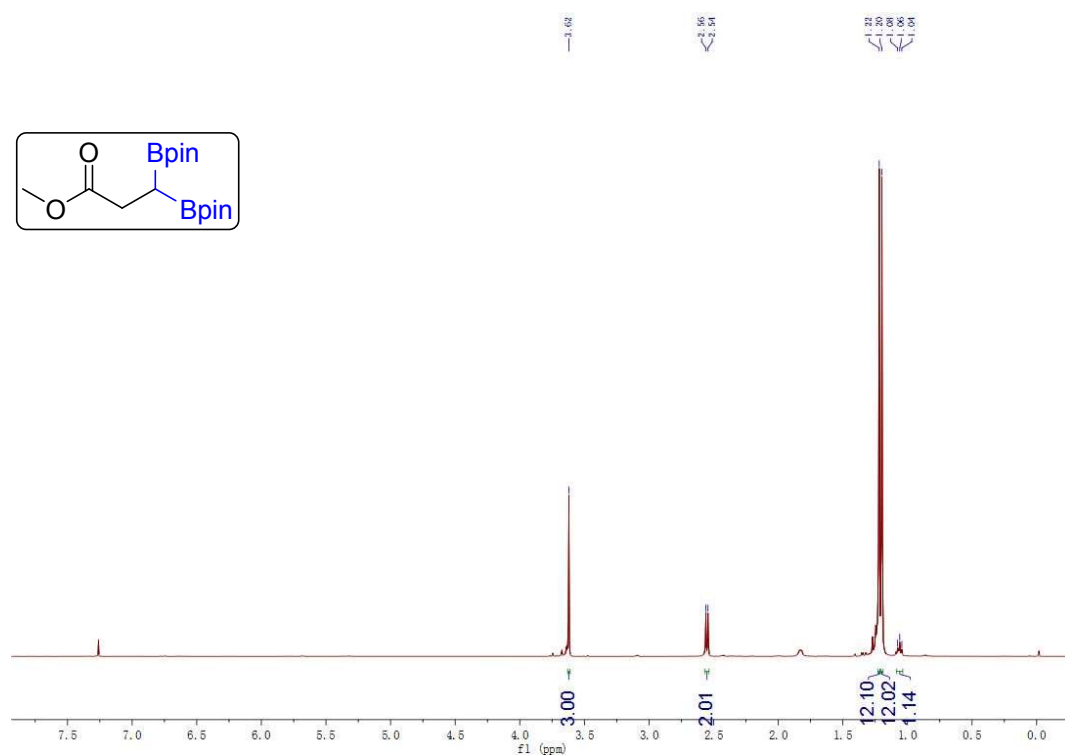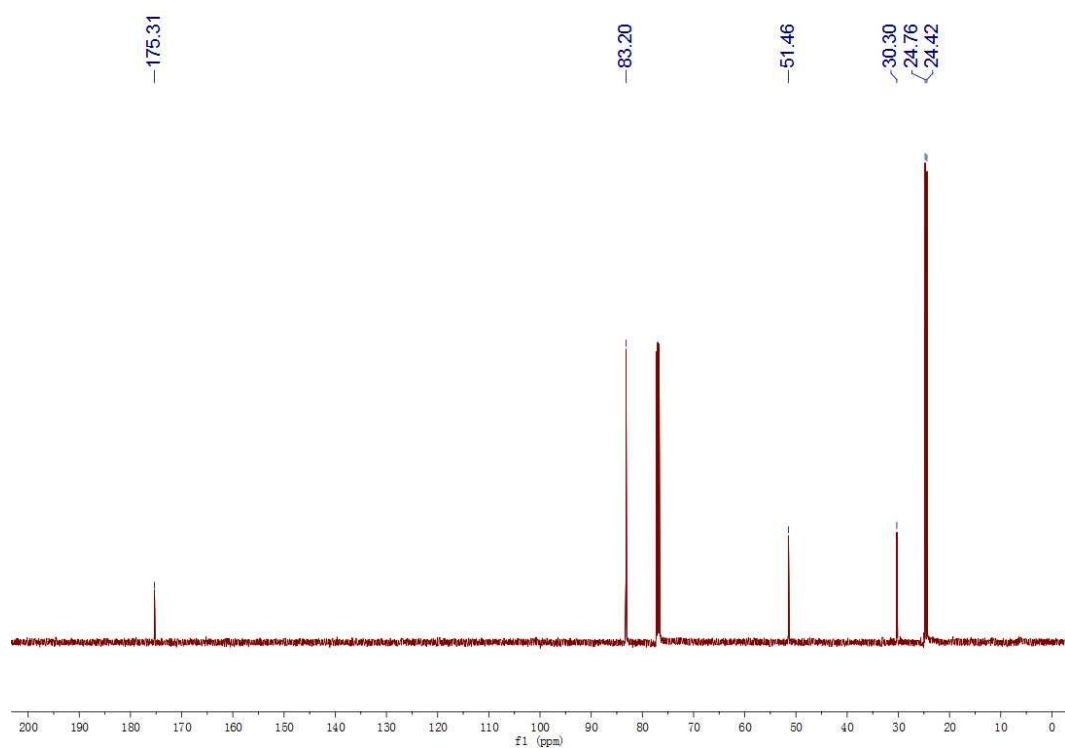

**Tert-butyl 3,3-bis(4,4,5,5-tetramethyl-1,3,2-dioxaborolan-2-yl)propanoate (3c)**

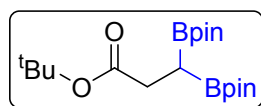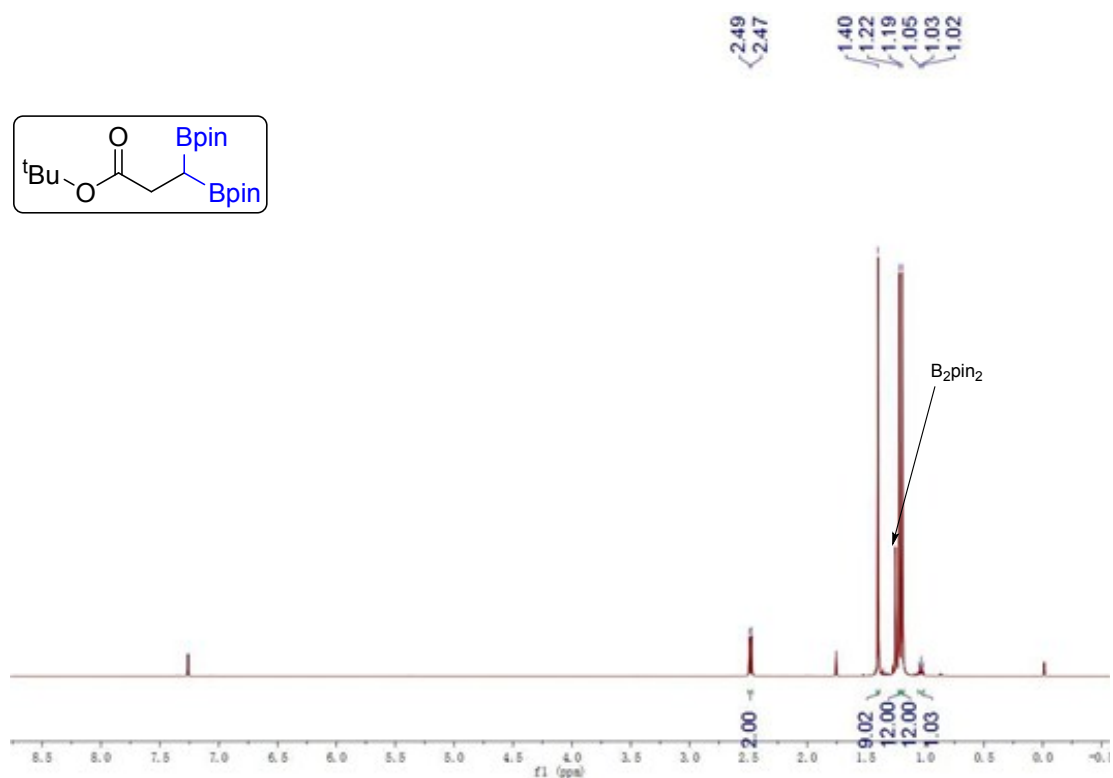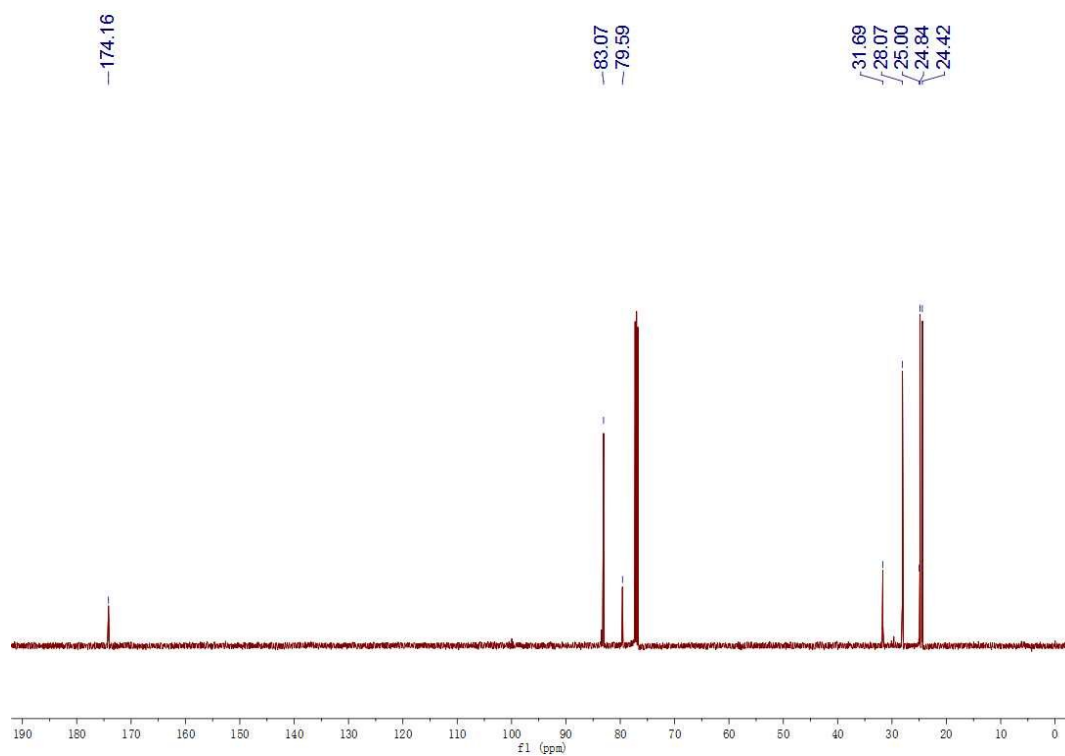

**3,5-Dimethylbenzyl 3,3-bis(4,4,5,5-tetramethyl-1,3,2-dioxaborolan-2-yl)propanoate (3d)**

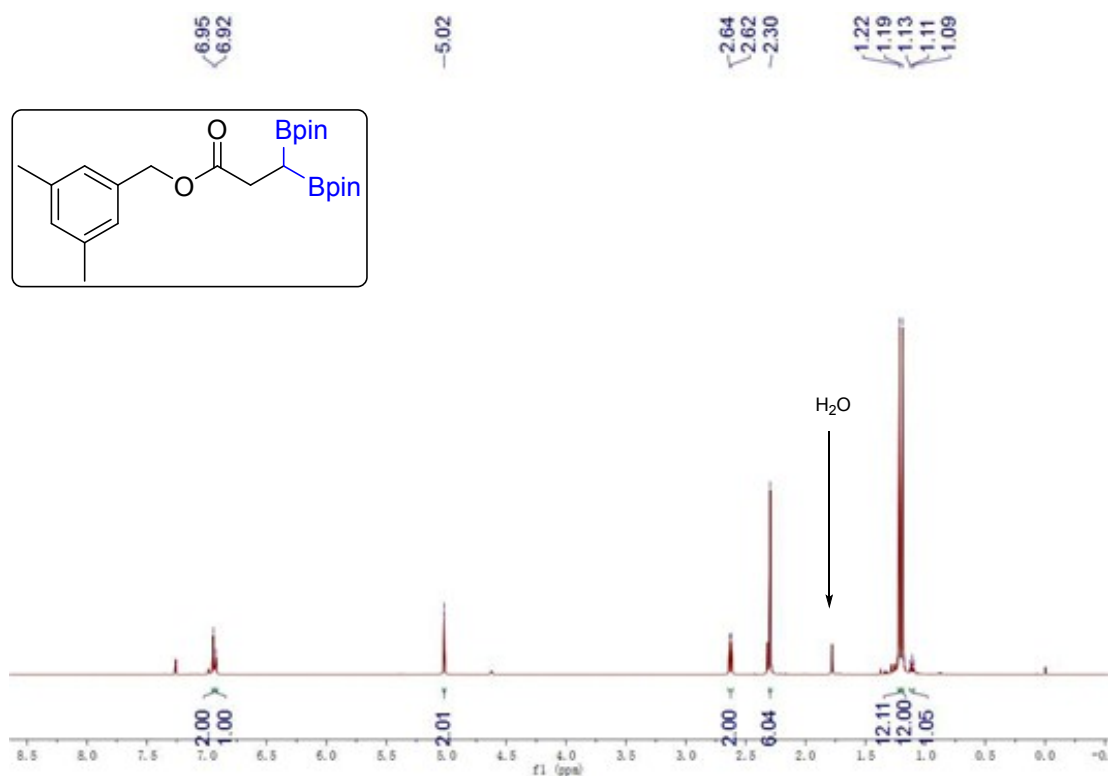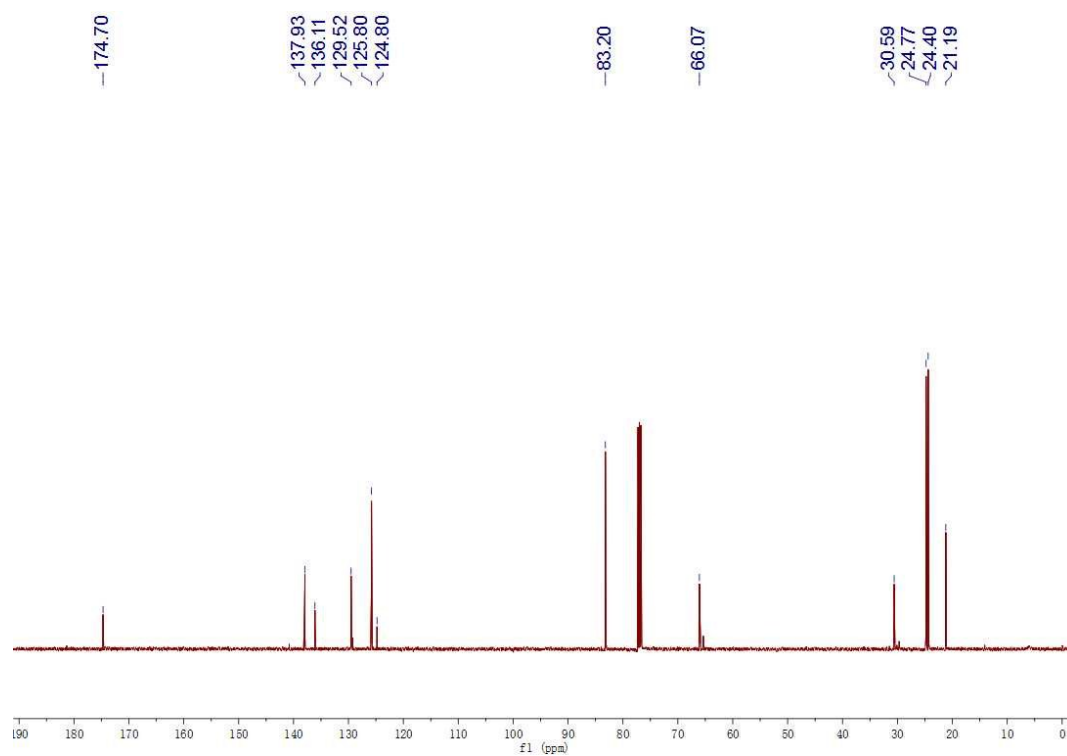

**Ethyl 3,3-bis(4,4,5,5-tetramethyl-1,3,2-dioxaborolan-2-yl)butanoate (3e)**

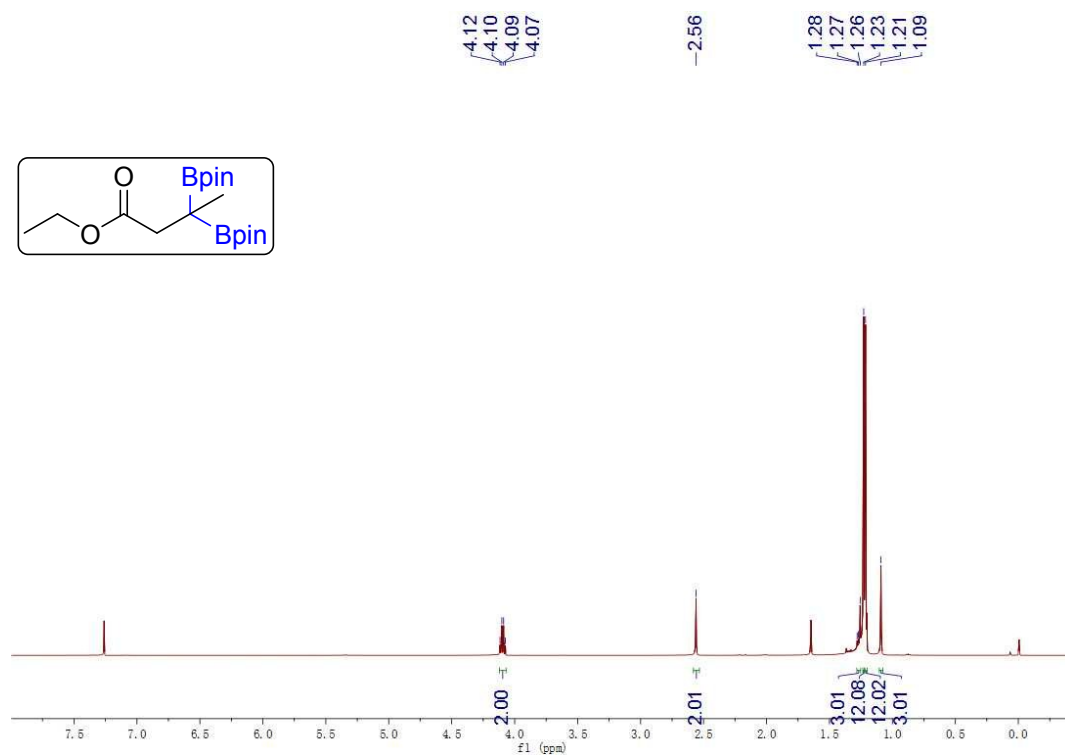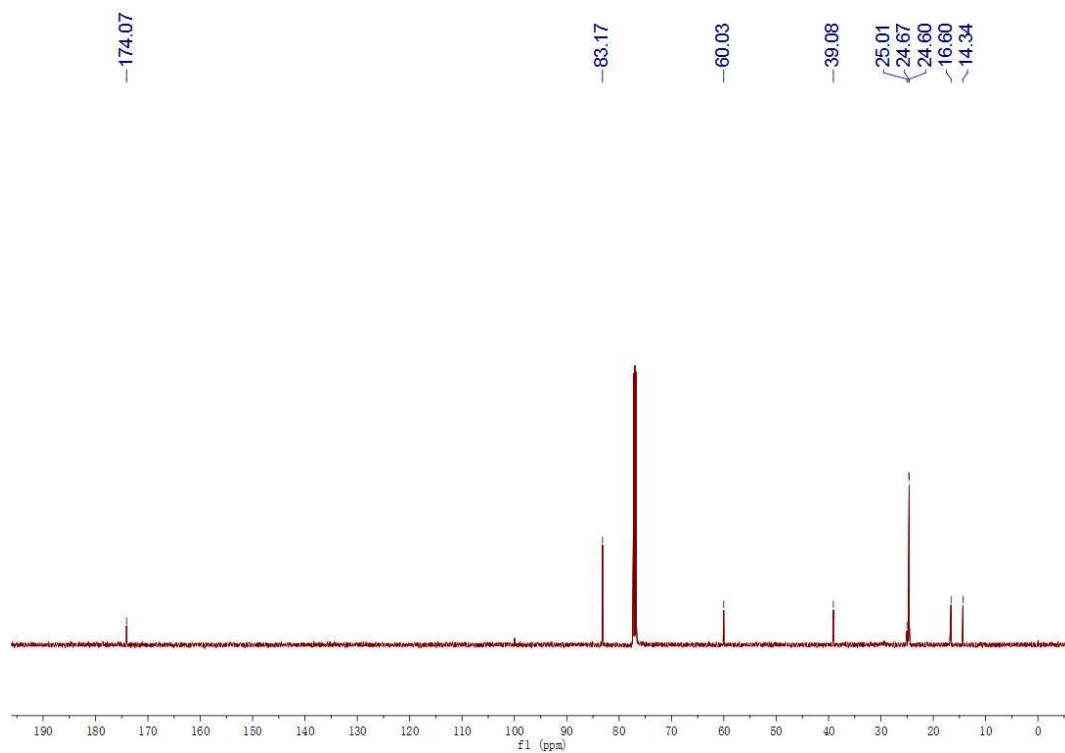

**Ethyl 3,3-bis(4,4,5,5-tetramethyl-1,3,2-dioxaborolan-2-yl)heptanoate (3f)**

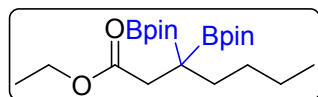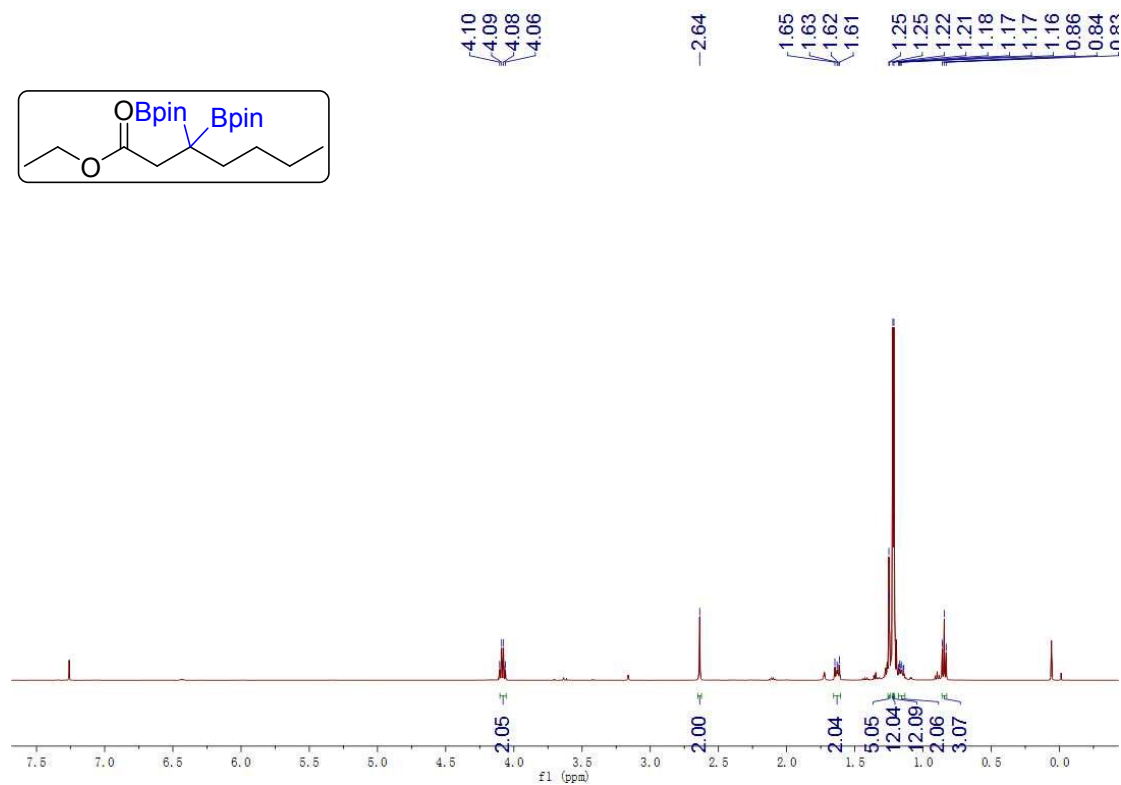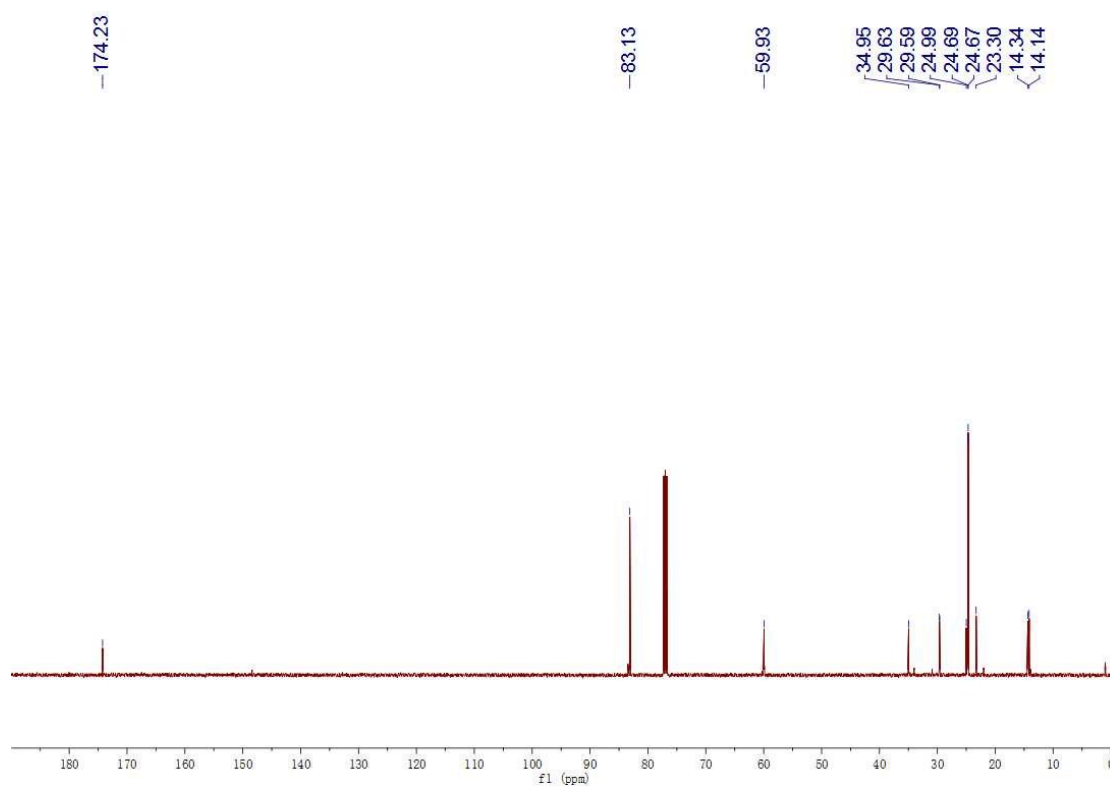

# **Benzyl 3,3-bis(4,4,5,5-tetramethyl-1,3,2-dioxaborolan-2-yl)butanoate (3g)**

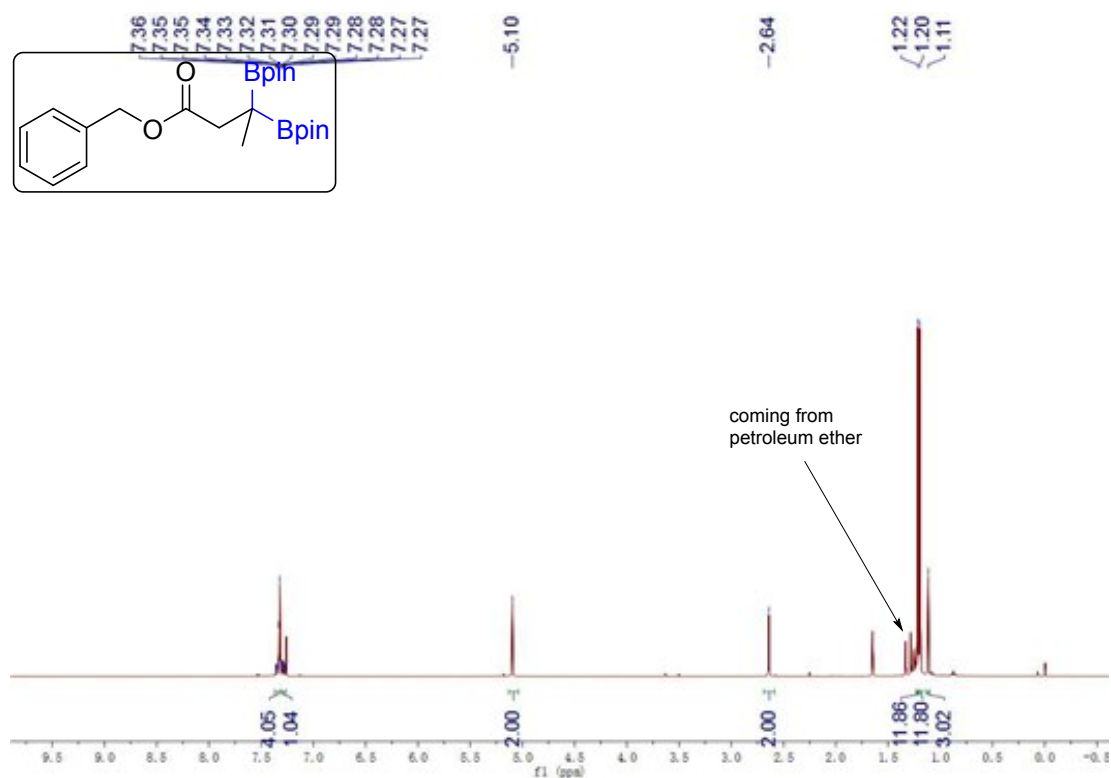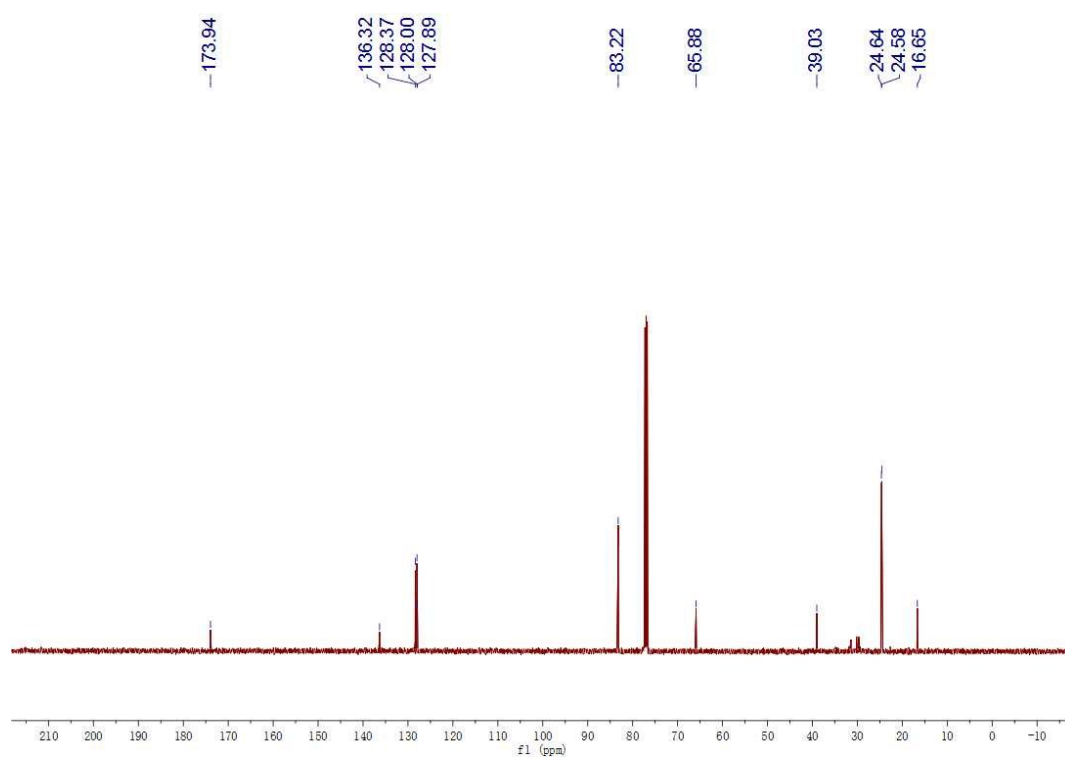



**2-Bromobenzyl 3,3-bis(4,4,5,5-tetramethyl-1,3,2-dioxaborolan-2-yl)butanoate (3h)**

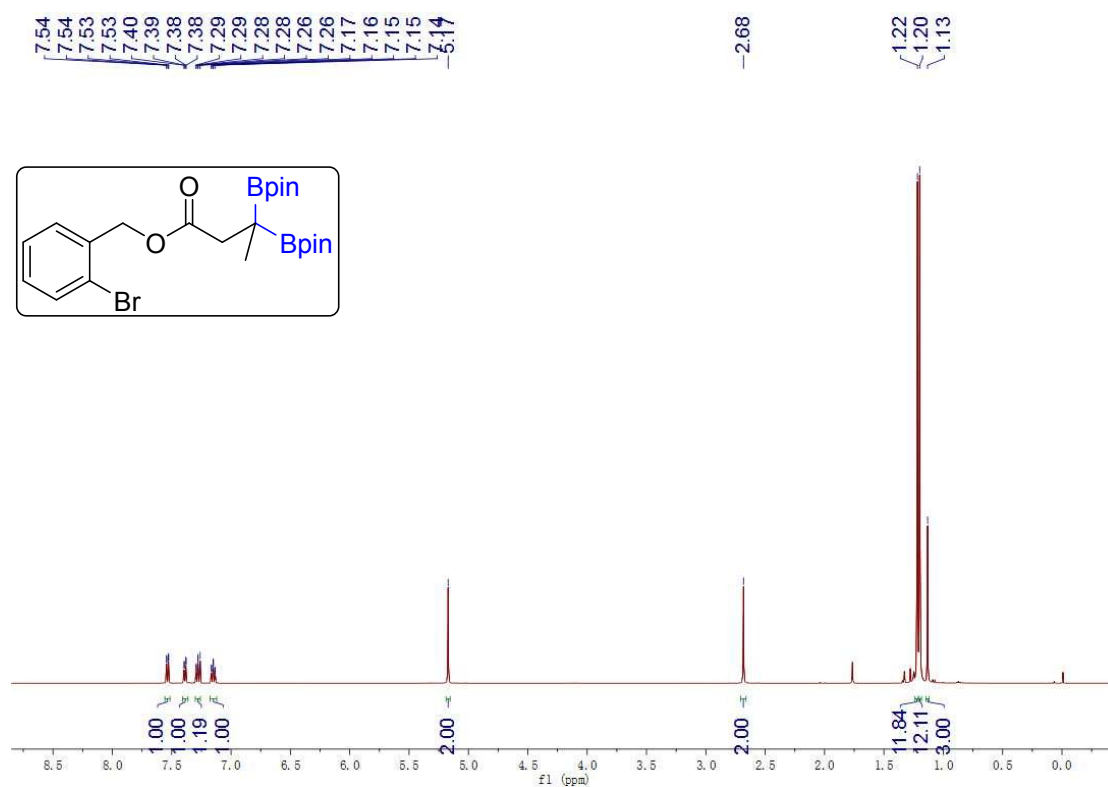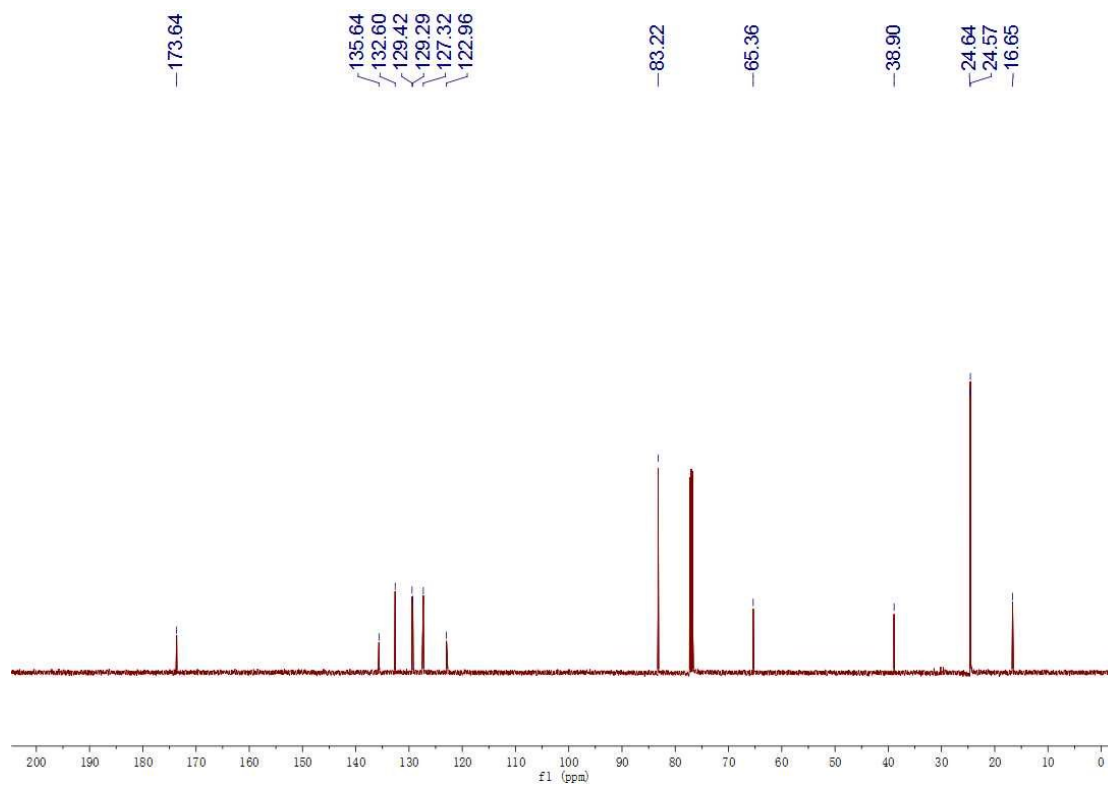

**4,4-Bis(4,4,5,5-tetramethyl-1,3,2-dioxaborolan-2-yl)butan-2-one (3i)**

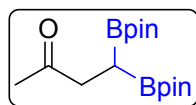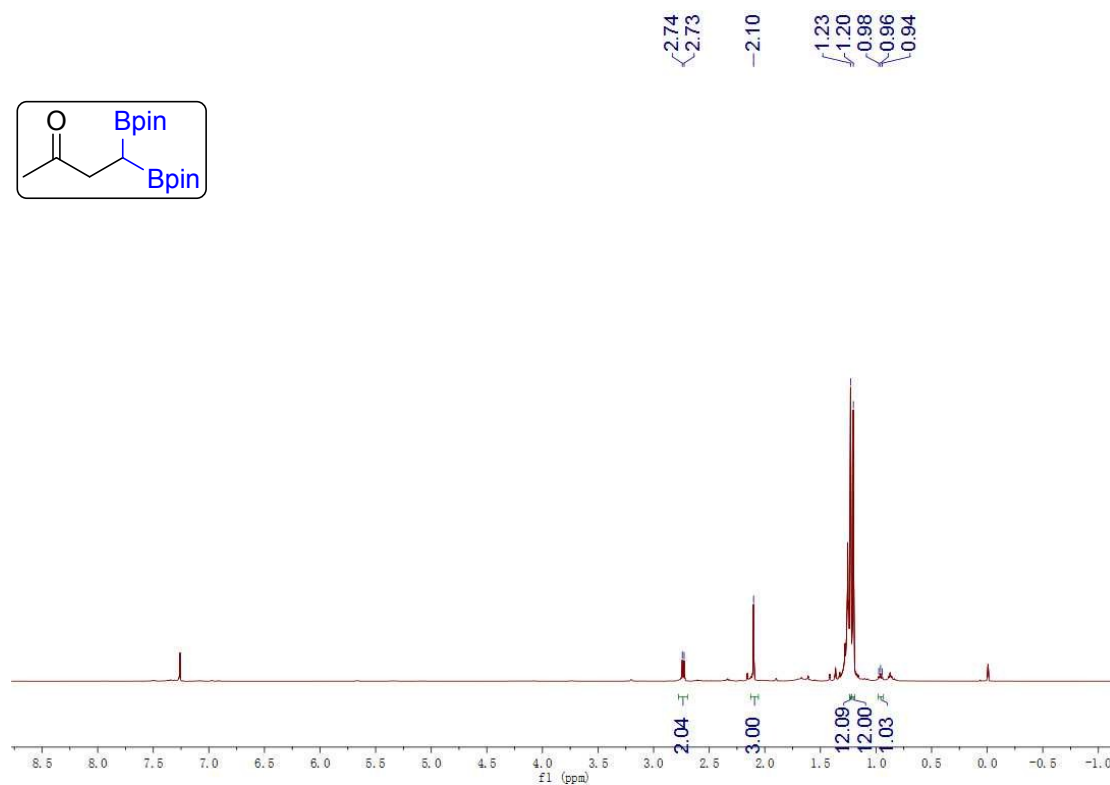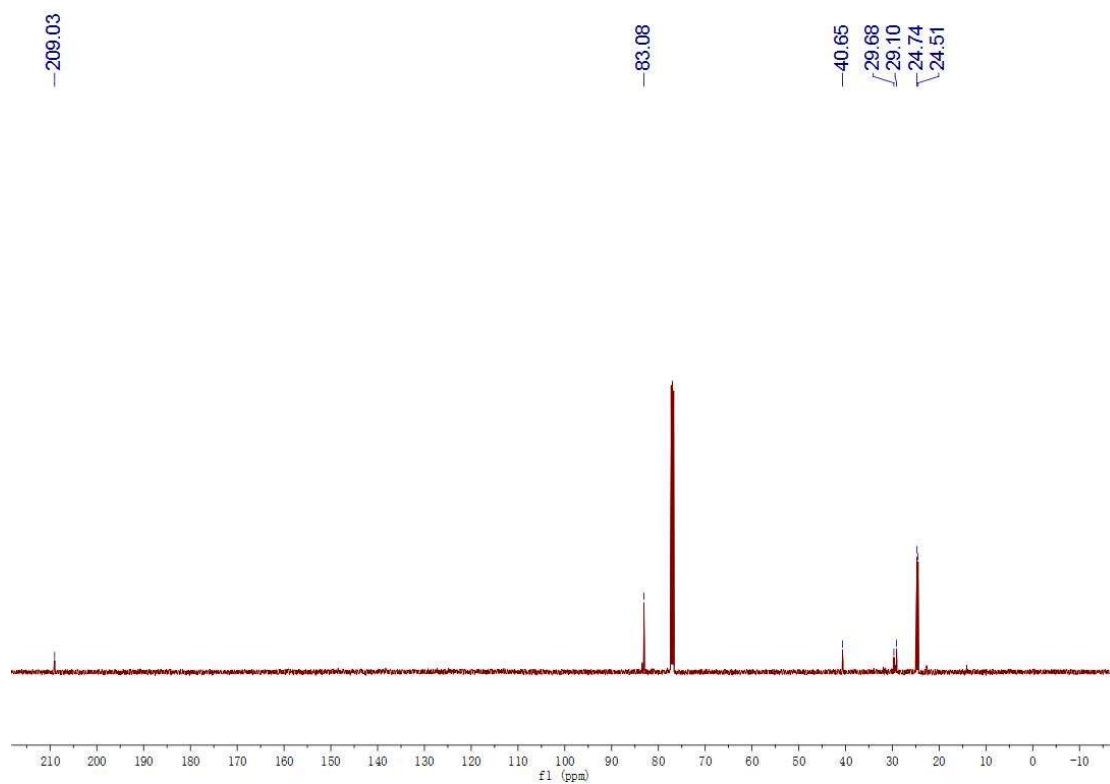

**4,4-Bis(4,4,5,5-tetramethyl-1,3,2-dioxaborolan-2-yl)hexan-2-one (3j)**

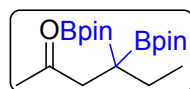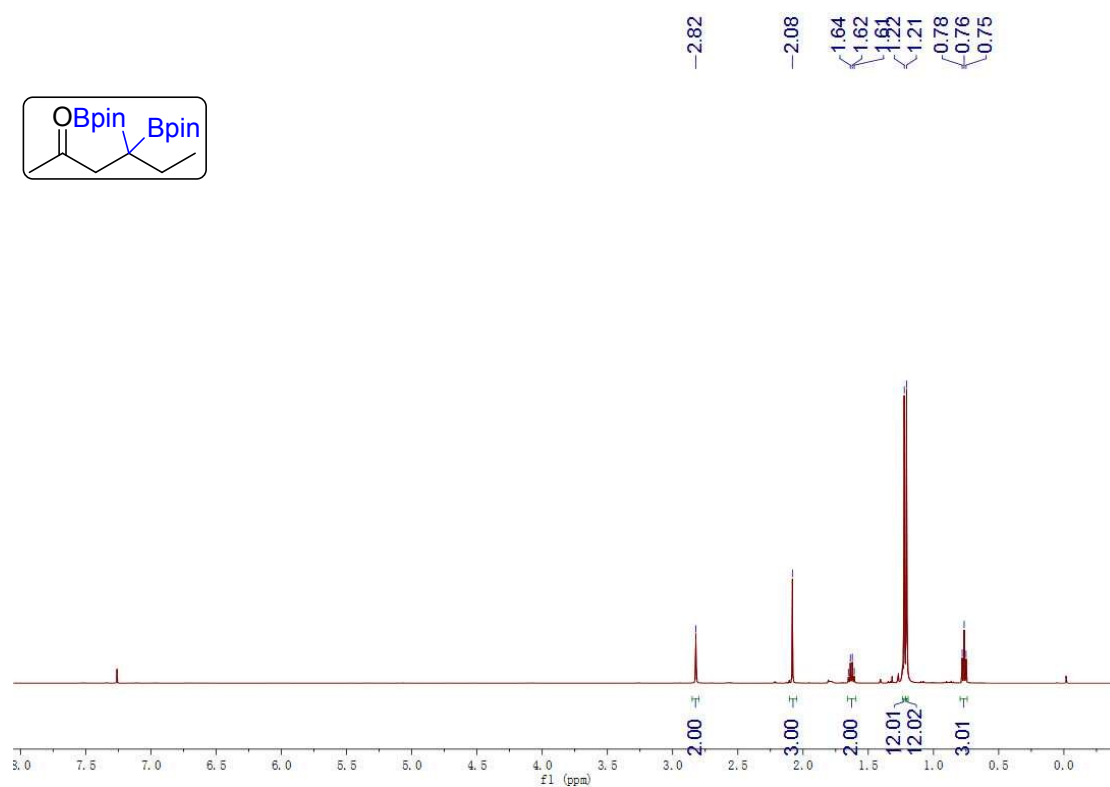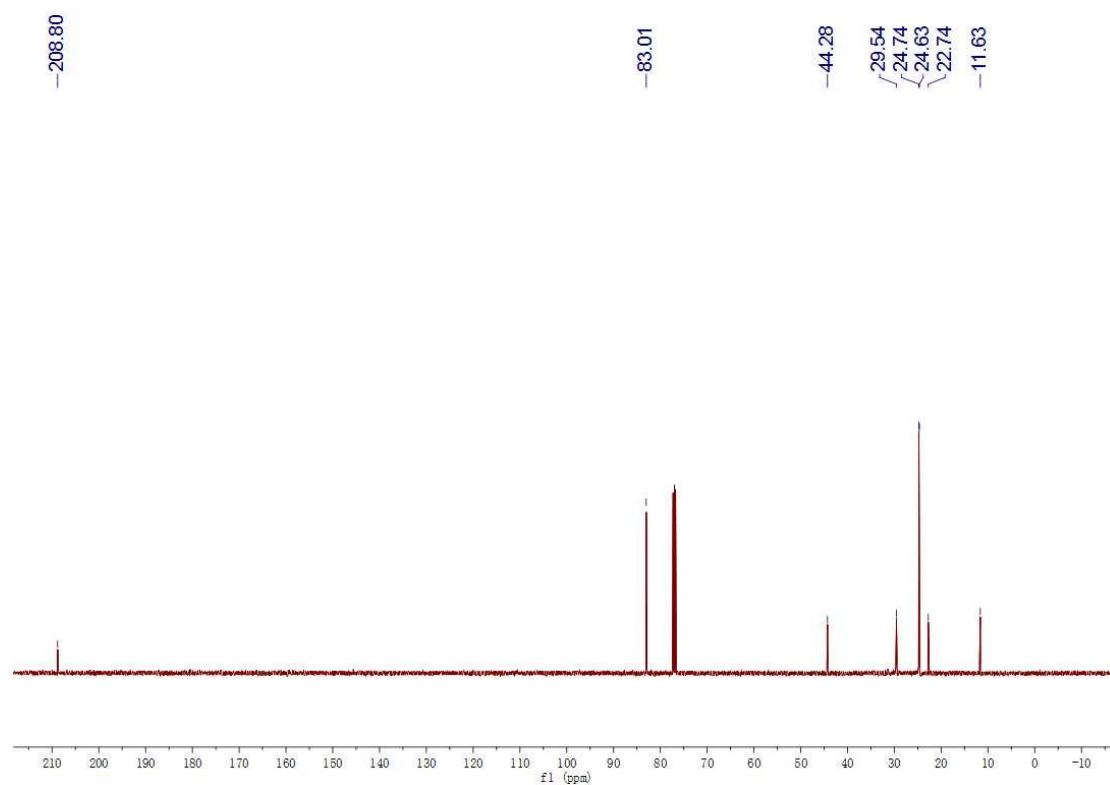

# 1-Phenyl-3,3-bis(4,4,5,5-tetramethyl-1,3,2-dioxaborolan-2-yl)heptan-1-one (3k)

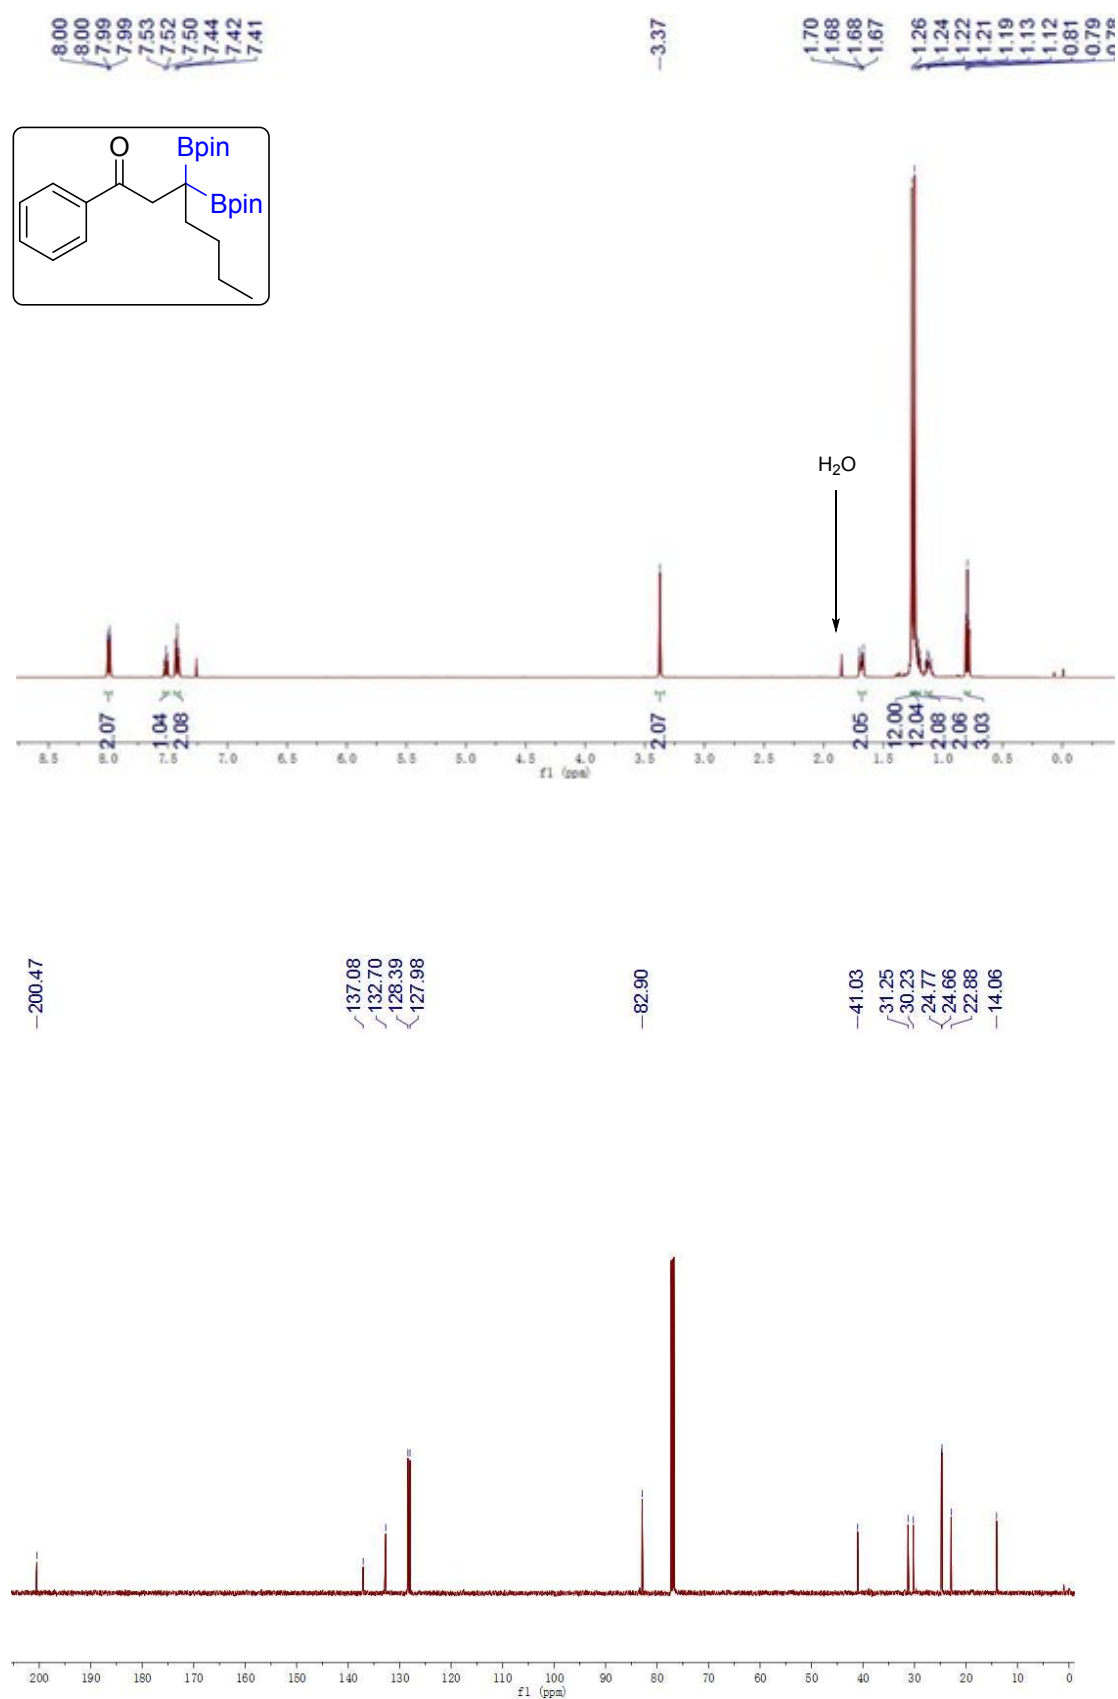

**3-Cyclopropyl-1-phenyl-3,3-bis(4,4,5,5-tetramethyl-1,3,2-dioxaborolan-2-yl)propan-1-one (3l)**

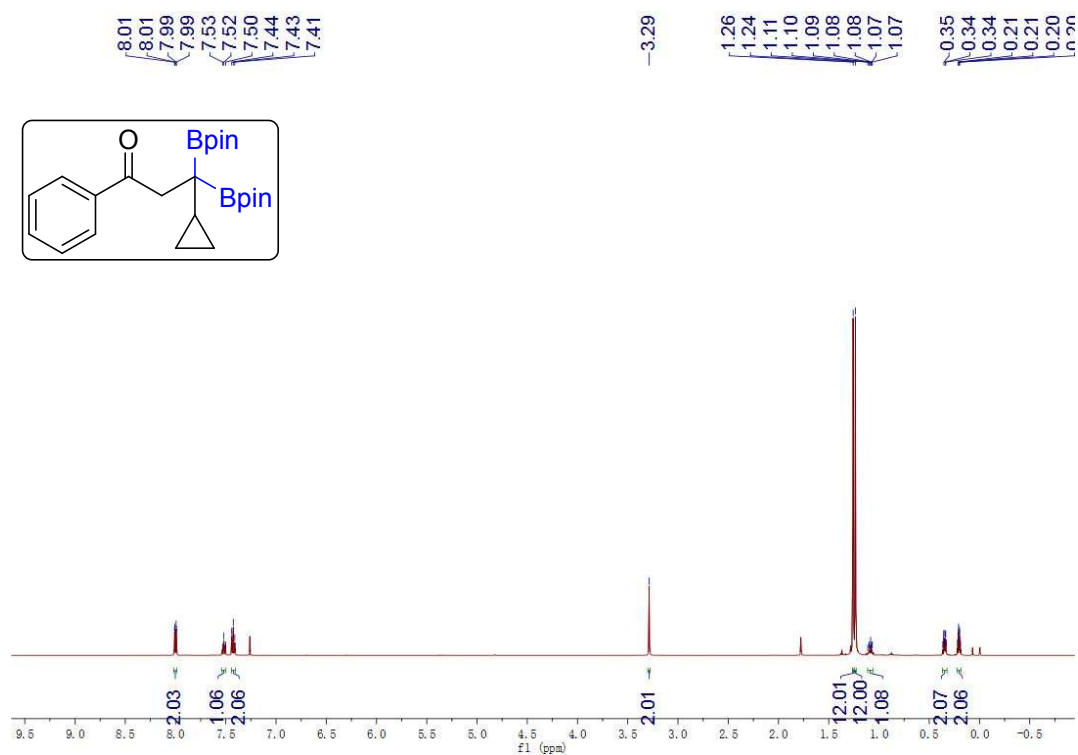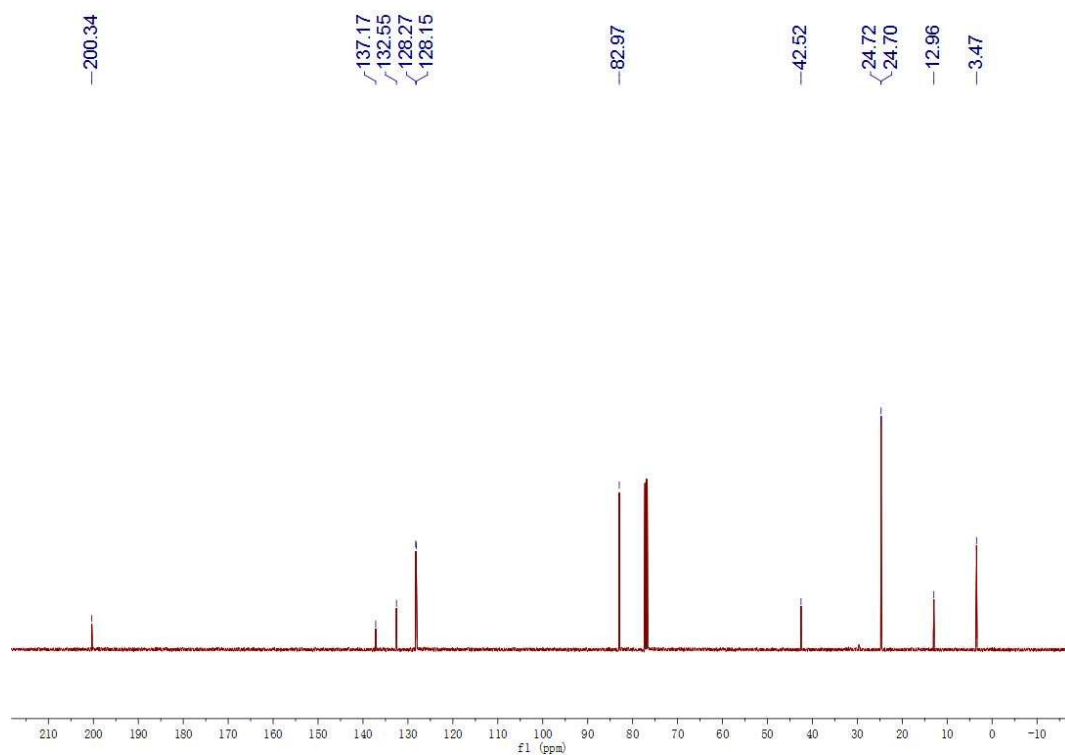

# 1-Phenyl-3,3-bis(4,4,5,5-tetramethyl-1,3,2-dioxaborolan-2-yl)decan-1-one (3m)

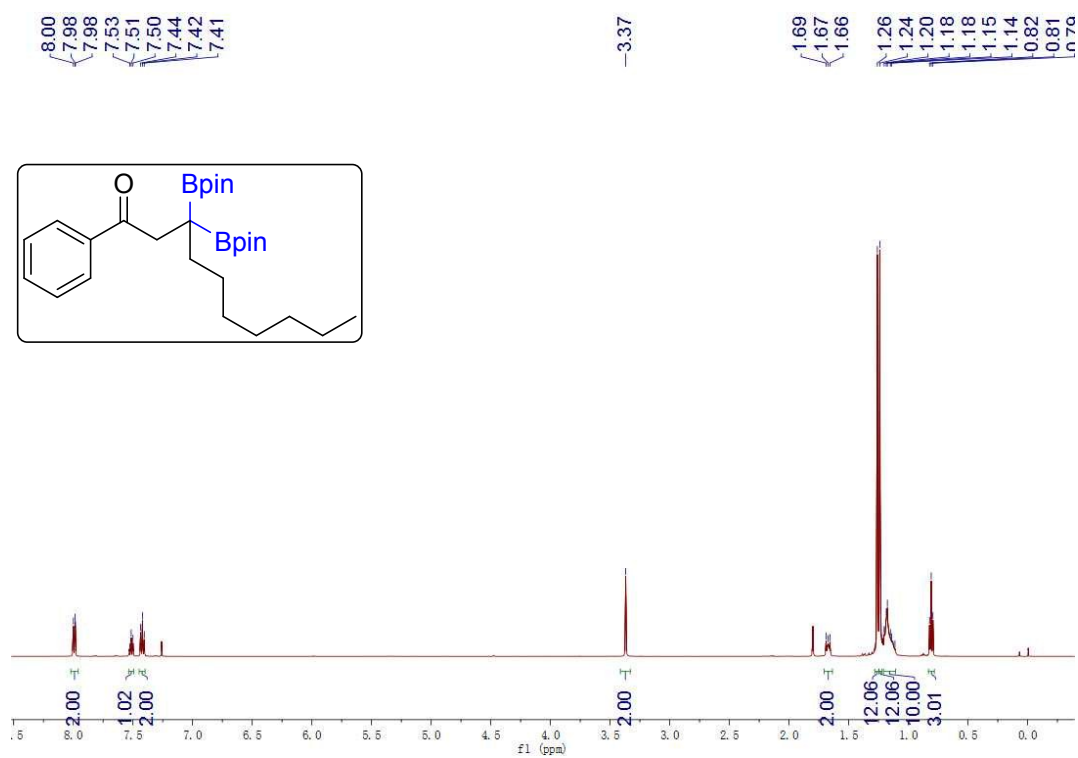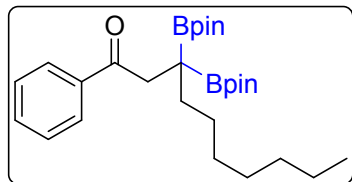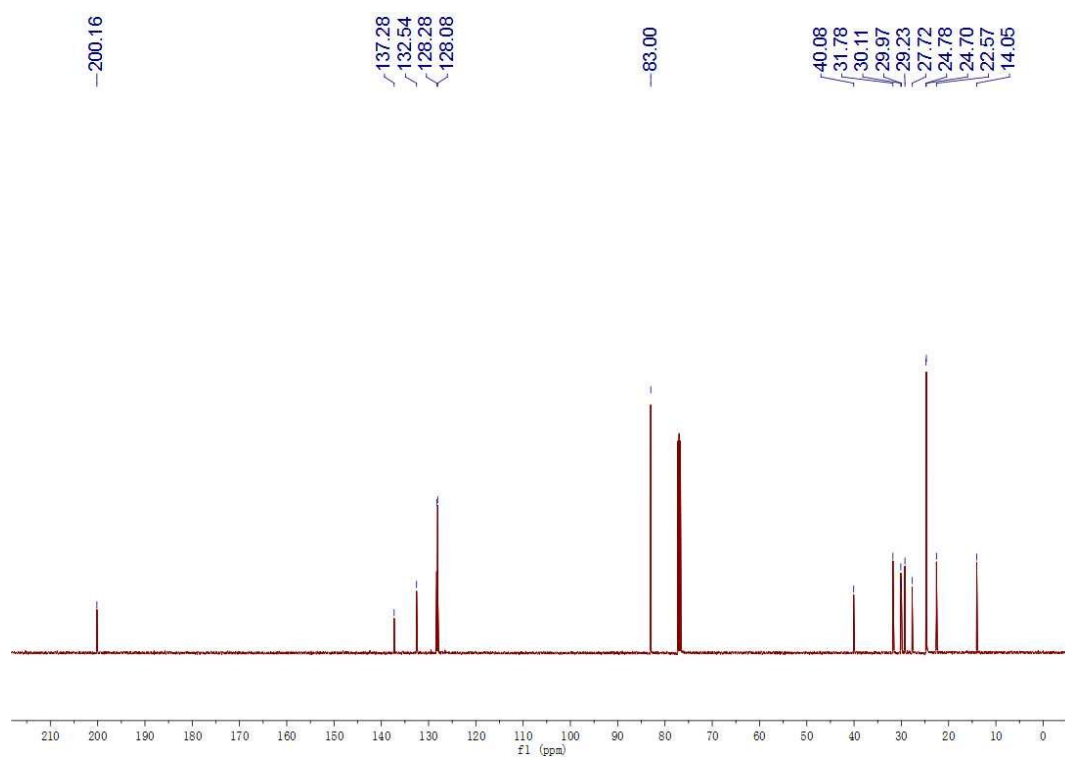

# 1,6-Diphenyl-3,3-bis(4,4,5,5-tetramethyl-1,3,2-dioxaborolan-2-yl)hexan-1-one (3n)

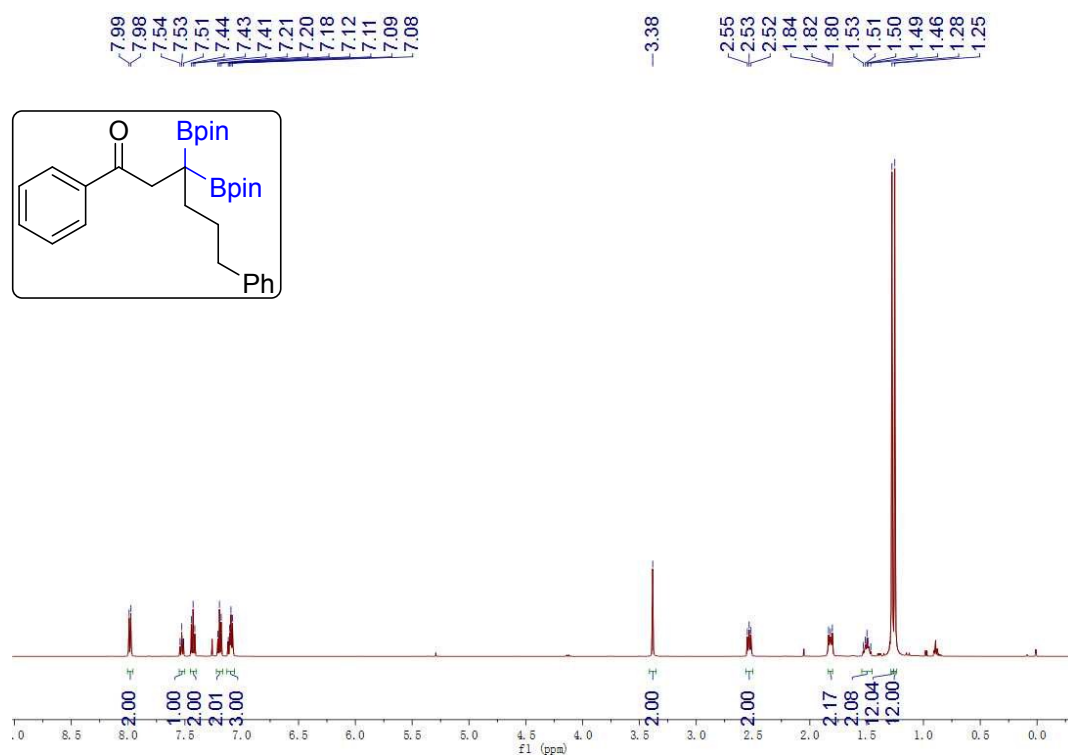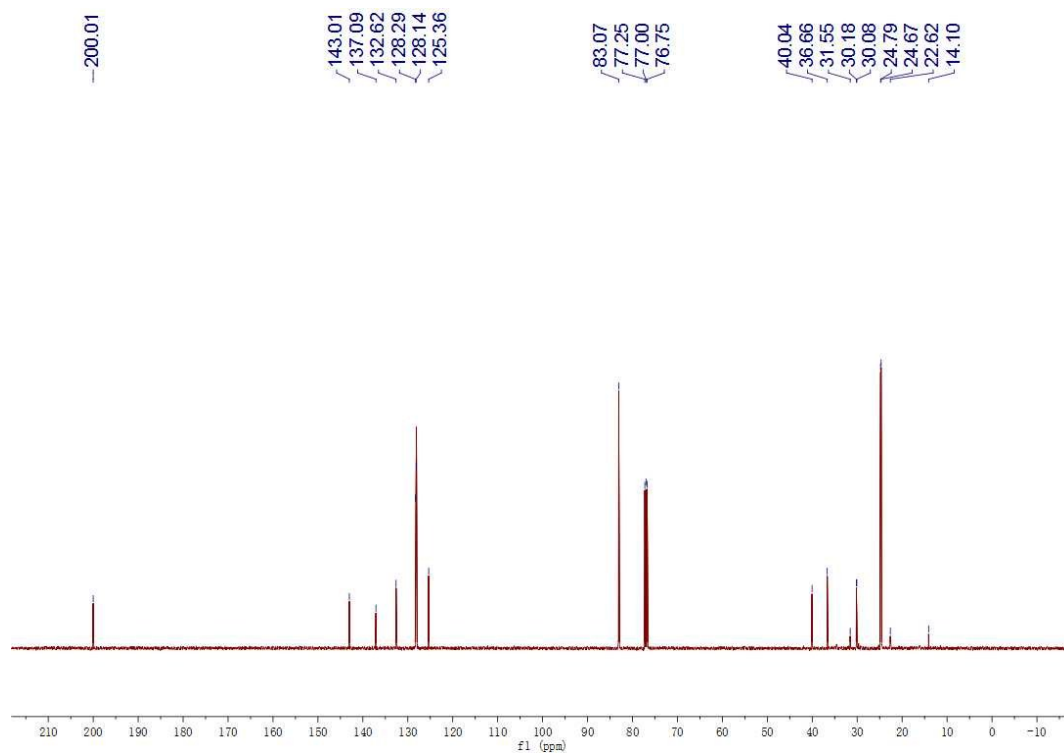

**N-phenyl-3,3-bis(4,4,5,5-tetramethyl-1,3,2-dioxaborolan-2-yl)butanamide (3o)**

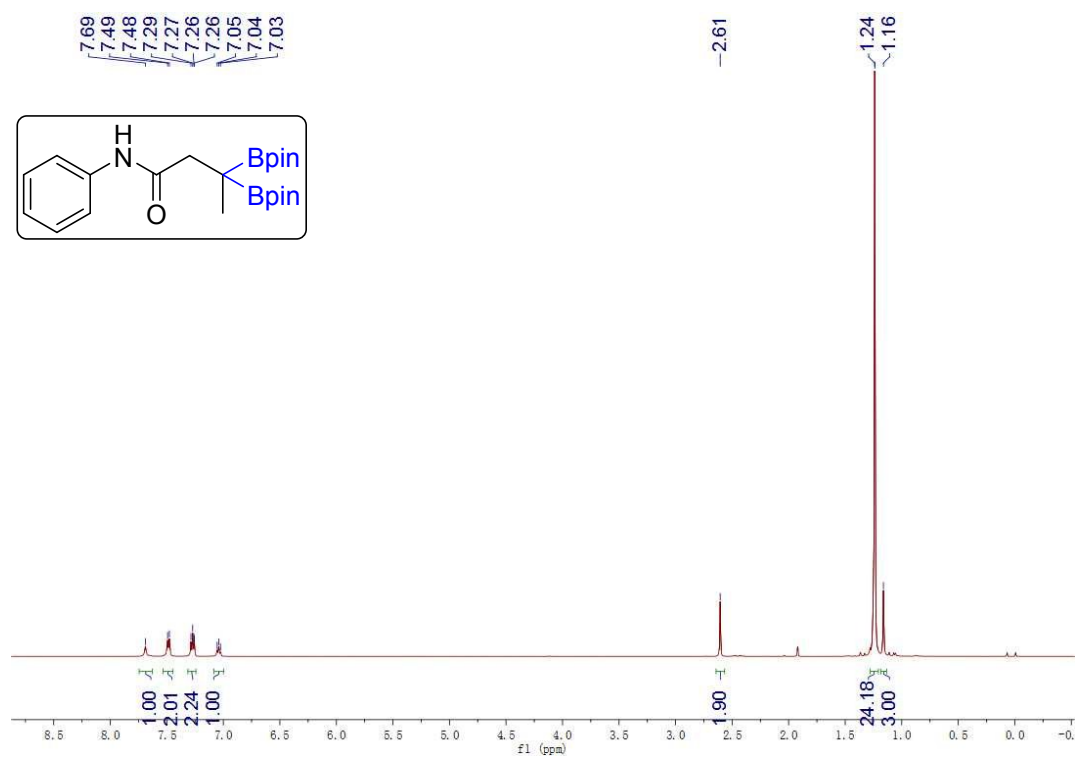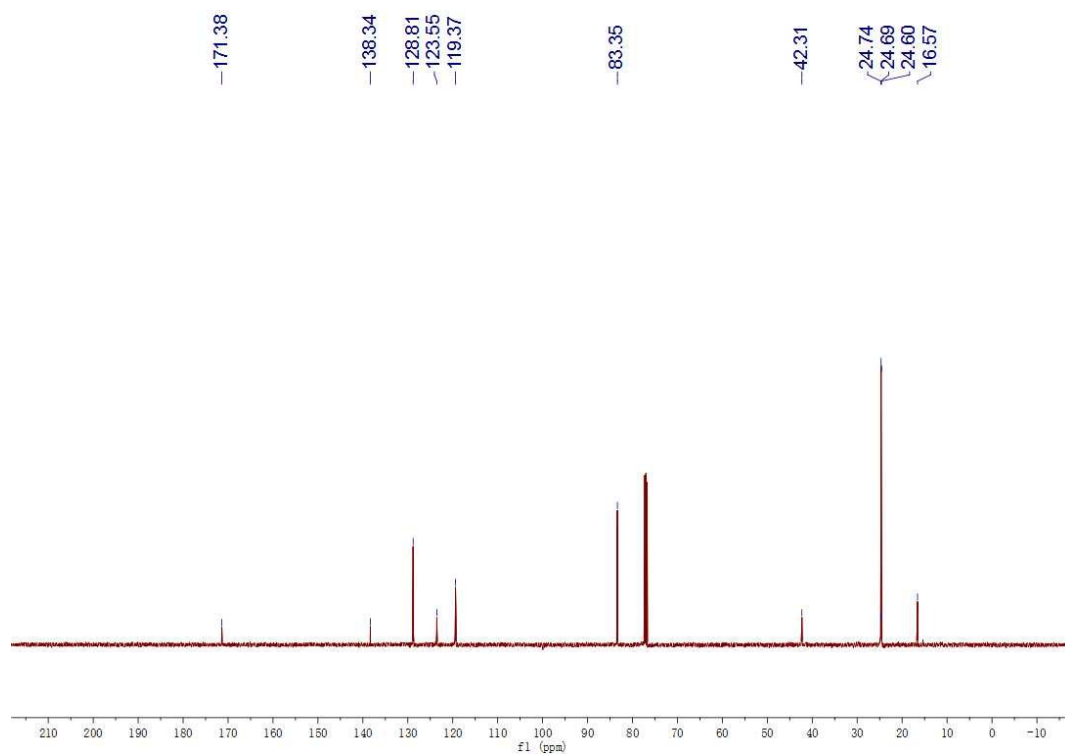



**N-methyl-N-phenyl-3,3-bis(4,4,5,5-tetramethyl-1,3,2-dioxaborolan-2-yl)butanamide (3p)**

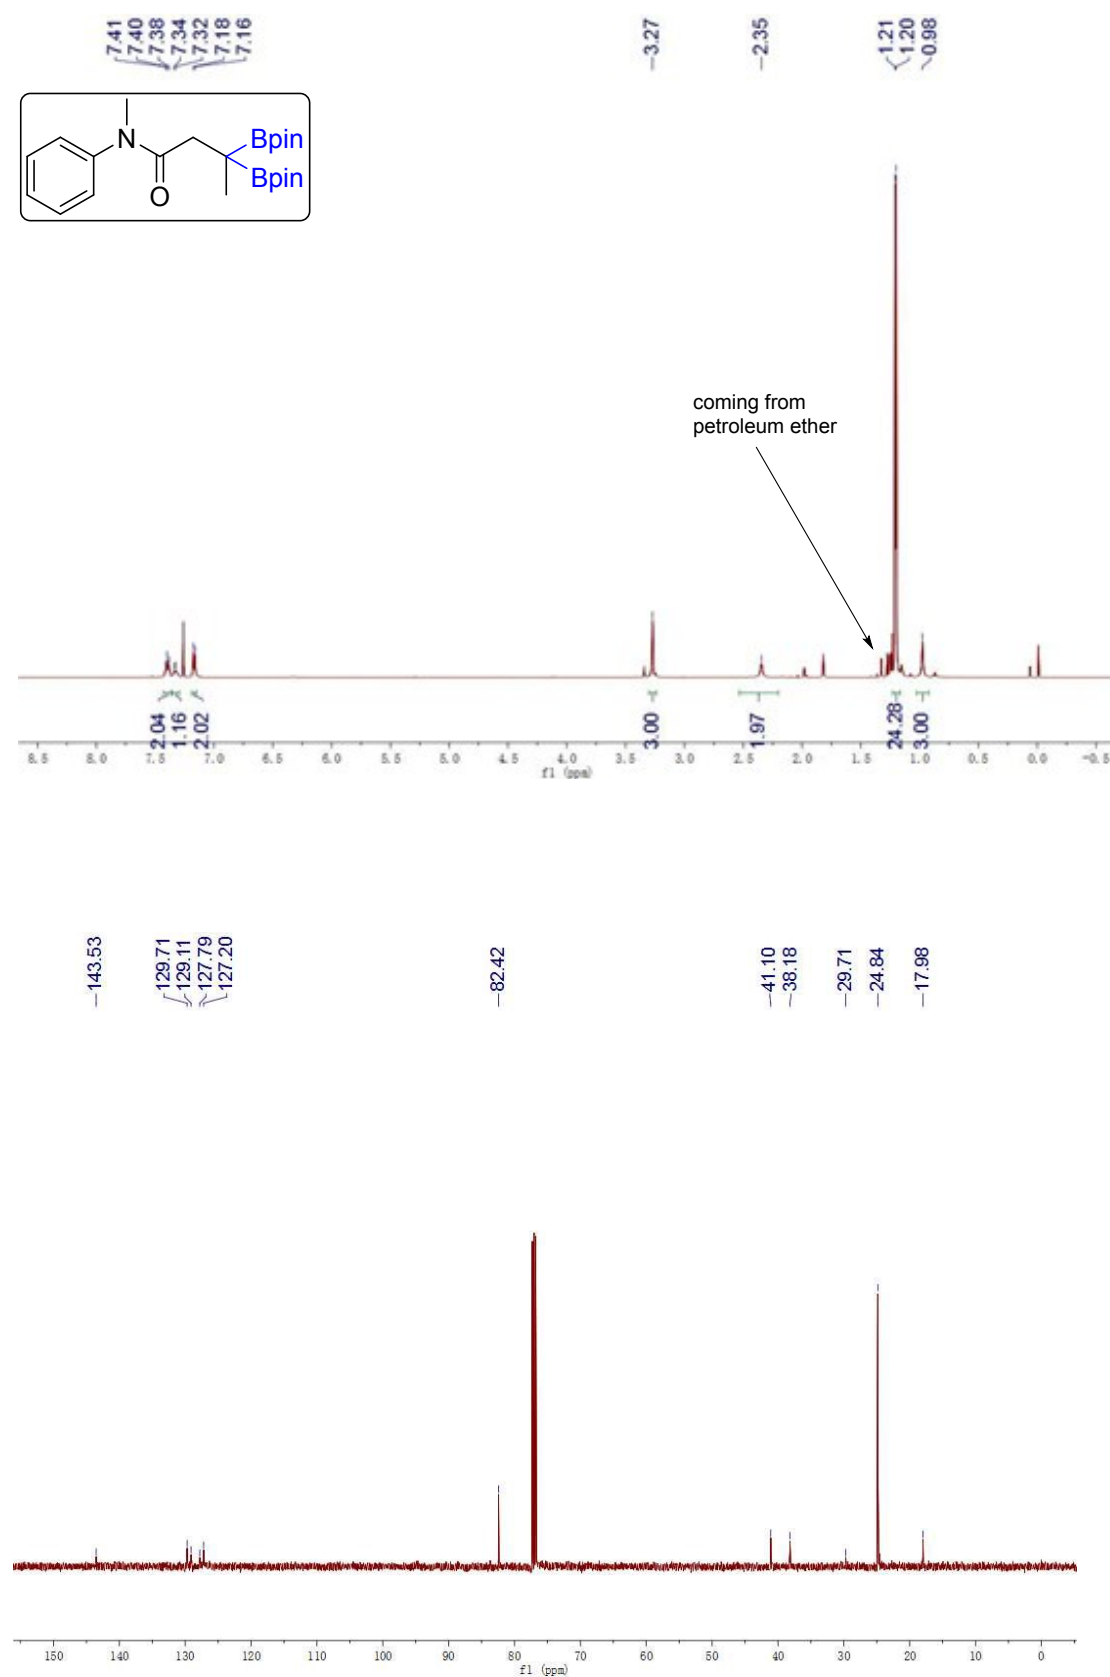

**N-(4-(tert-butyl)phenyl)-3,3-bis(4,4,5,5-tetramethyl-1,3,2-dioxaborolan-2-yl)butanamide (3q)**

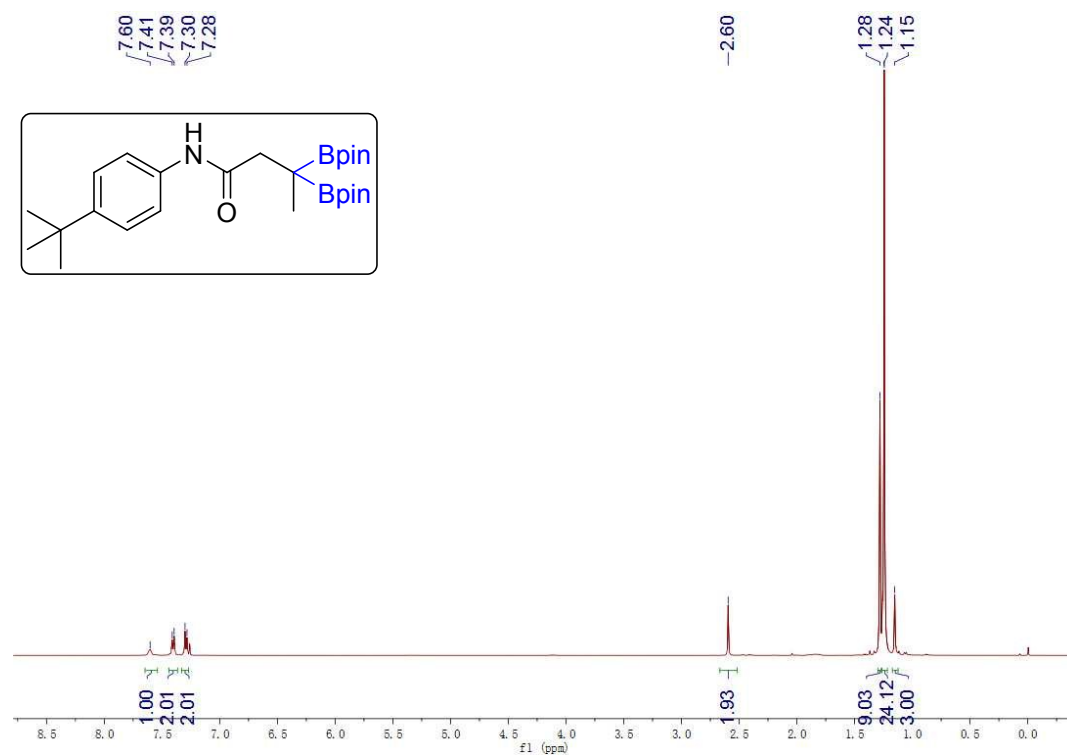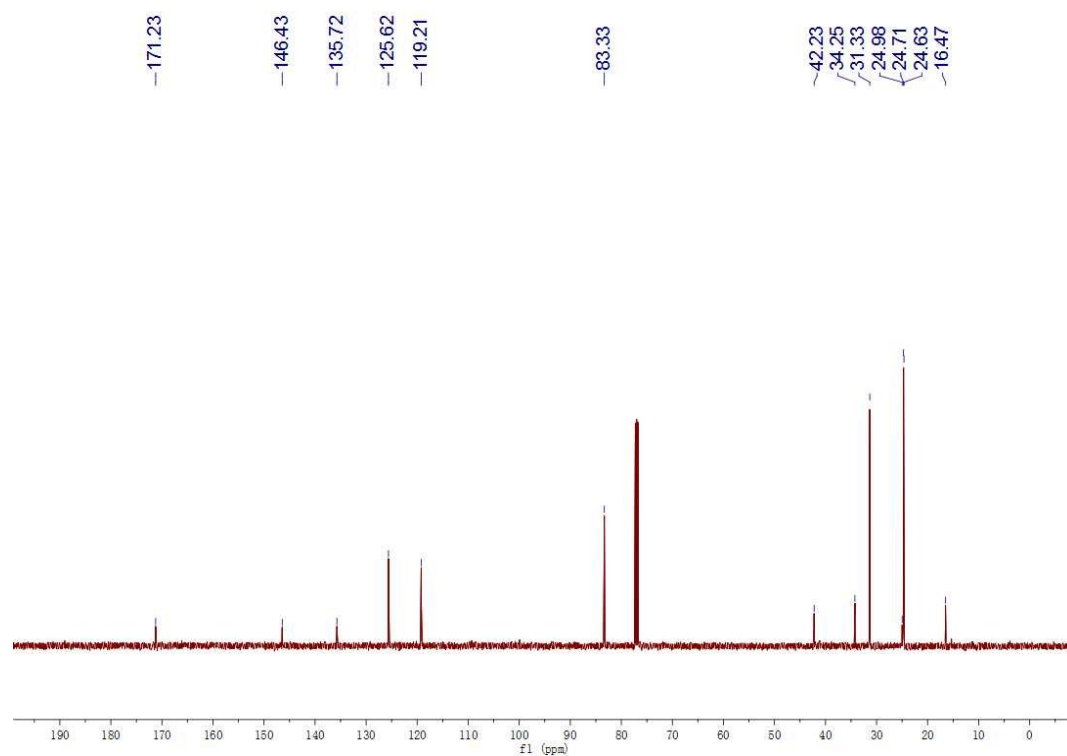

**1,3-diphenyl-3-(4,4,5,5-tetramethyl-1,3,2-dioxaborolan-2-yl)propan-1-one (3r)**

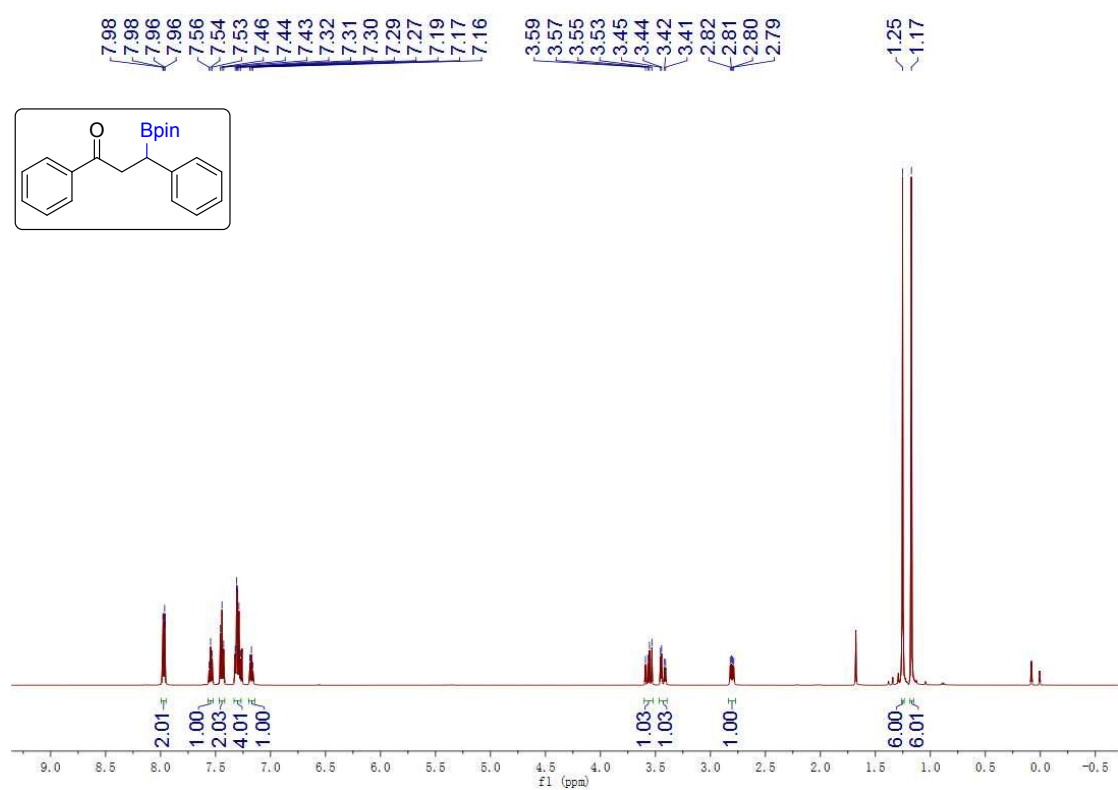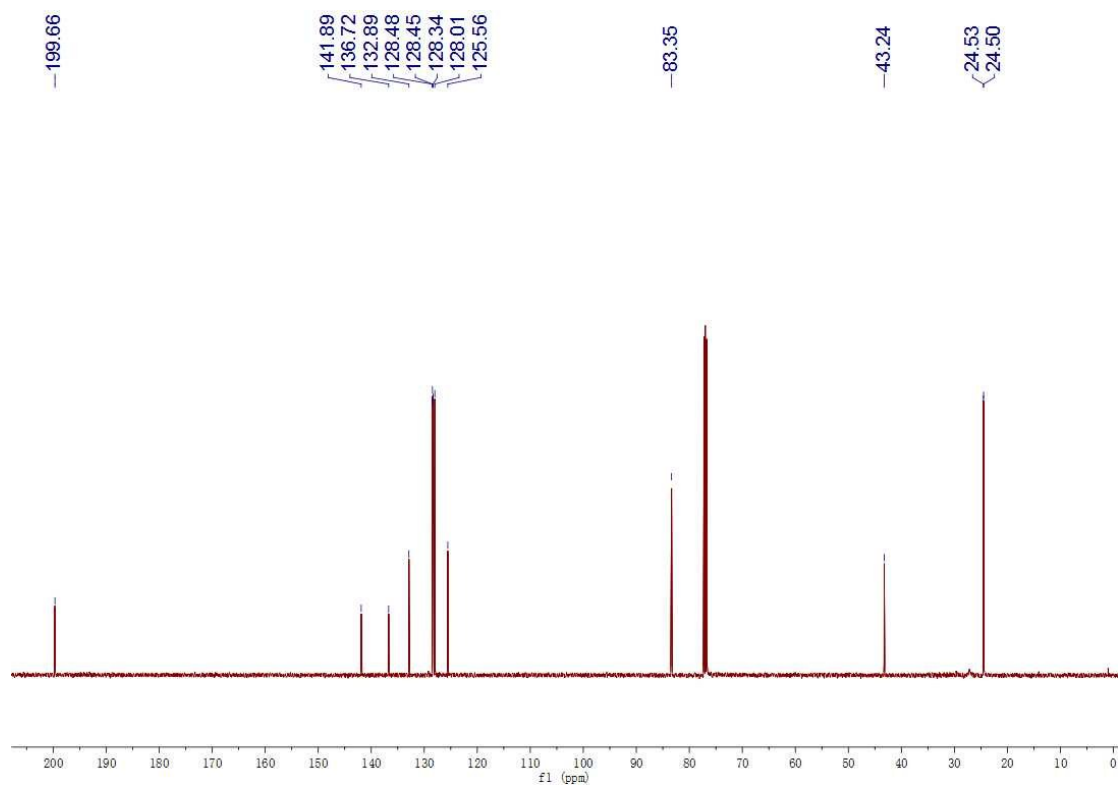

# 4-(3-oxo-3-phenylpropyl)benzonitrile (3s)

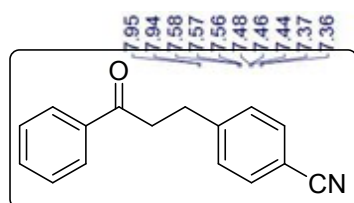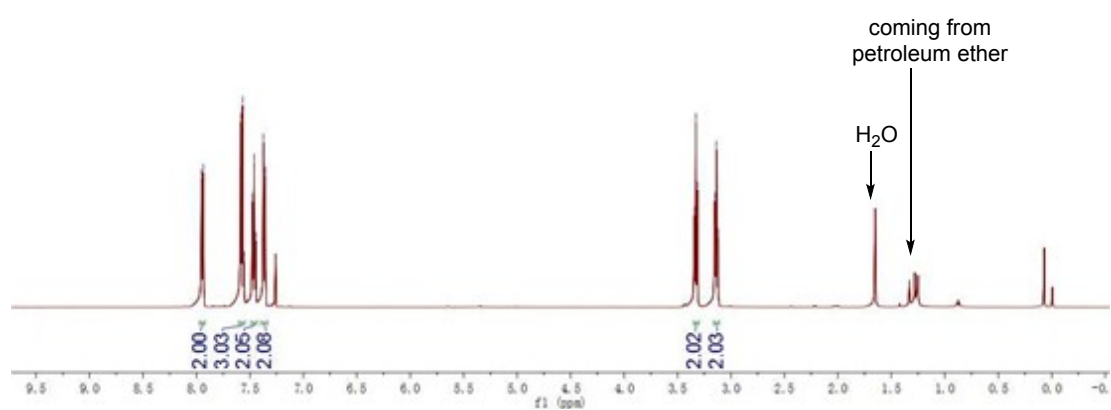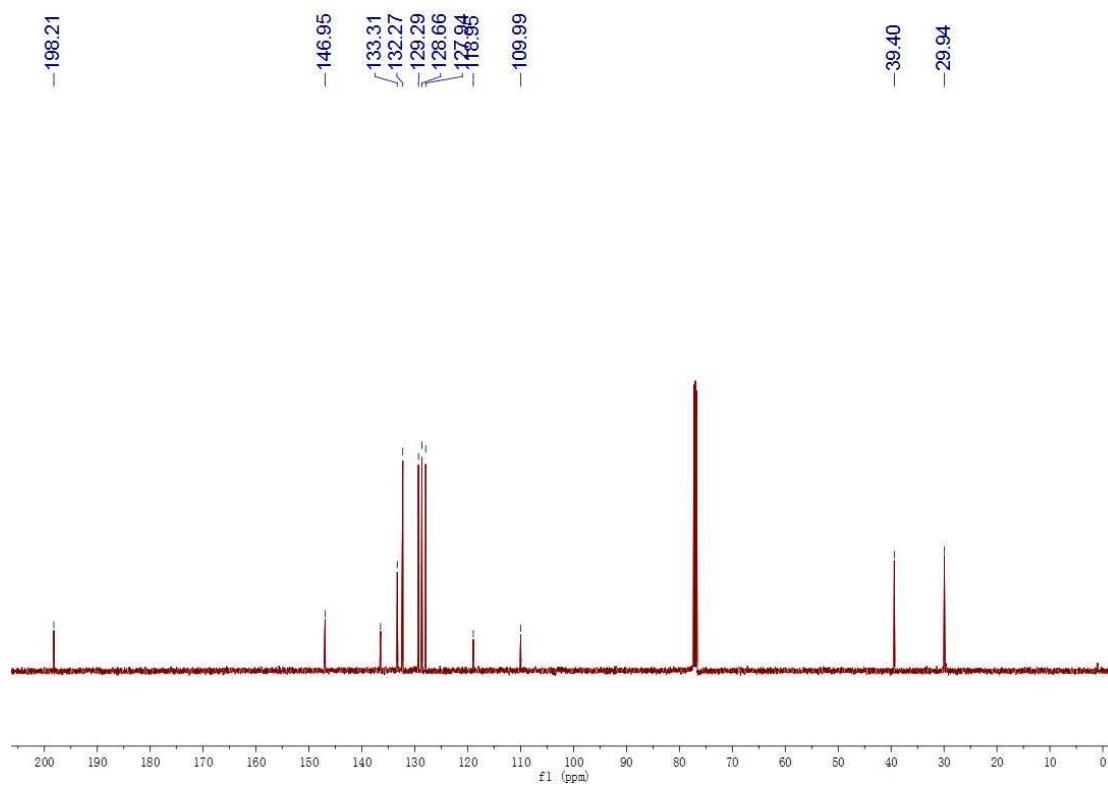

4-(2,2-Bis(4,4,5,5-tetramethyl-1,3,2-dioxaborolan-2-yl)ethyl)benzonitrile (6a-*para*)

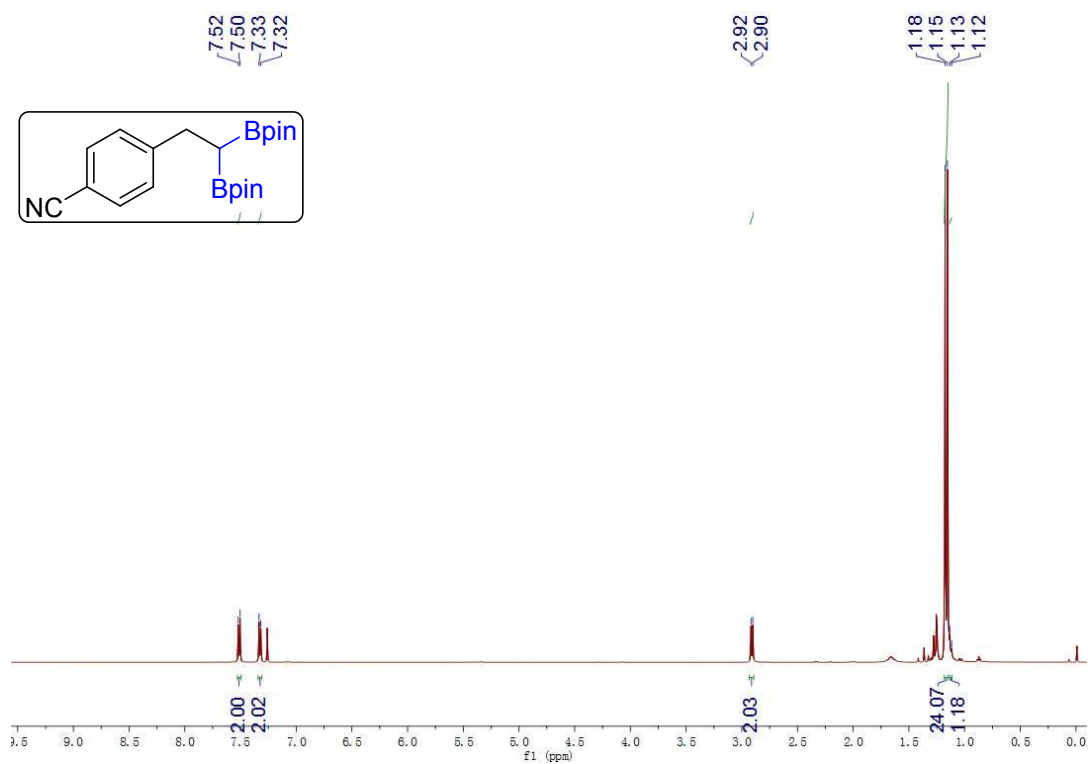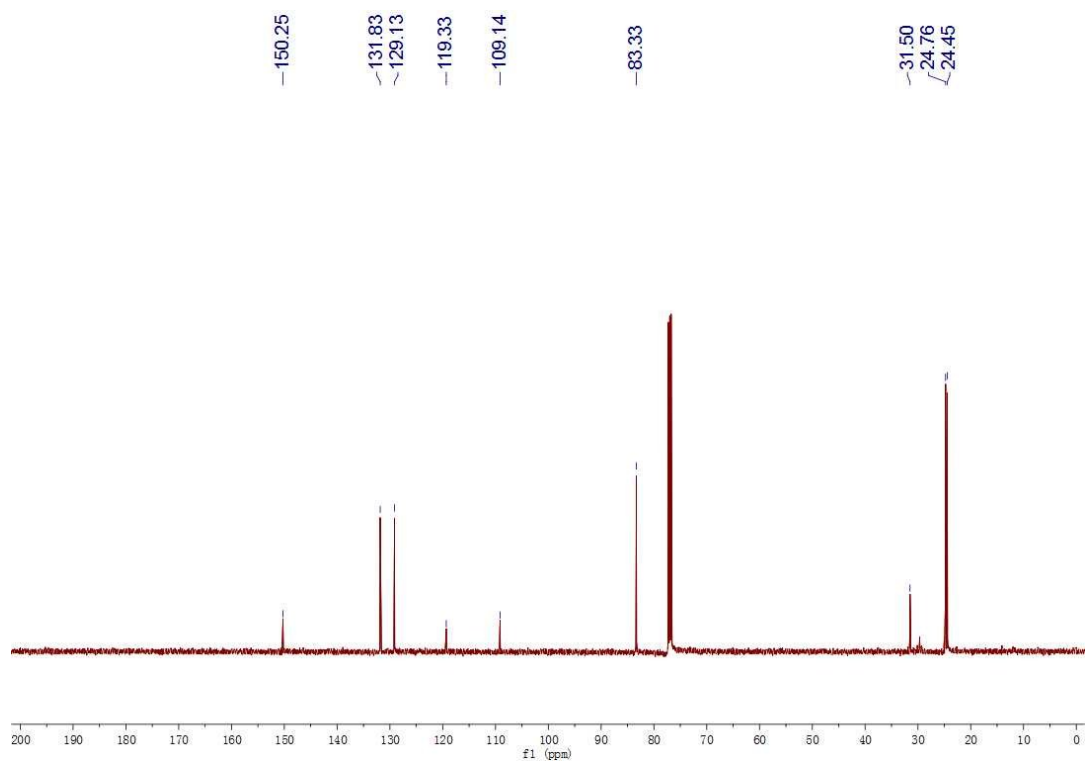

**3-(2,2-Bis(4,4,5,5-tetramethyl-1,3,2-dioxaborolan-2-yl)ethyl)benzonitrile (6-*meta*)**

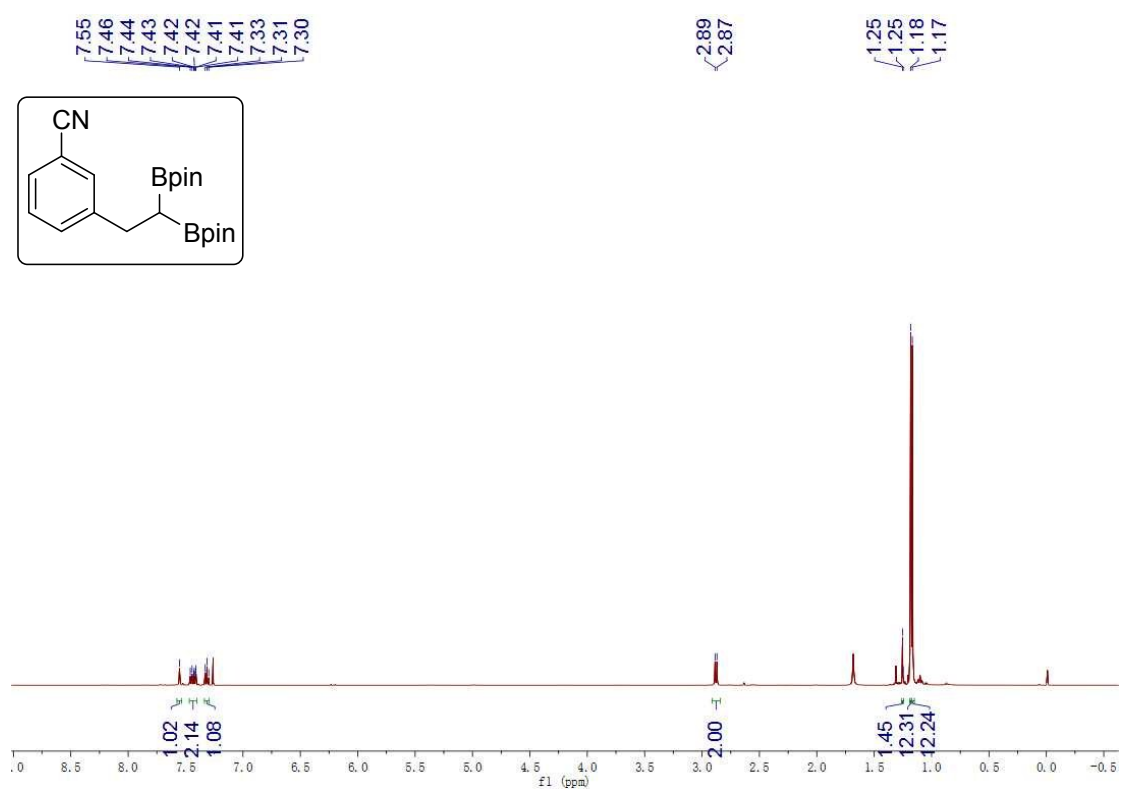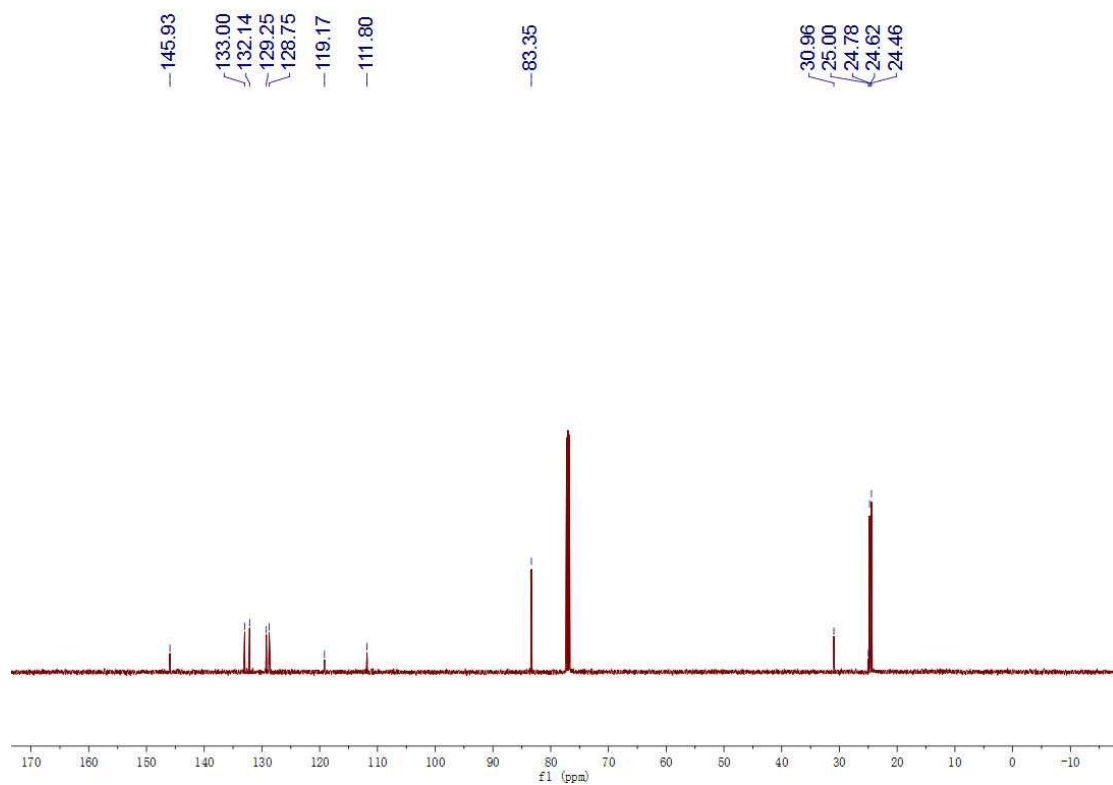

**2-(2,2-bis(4,4,5,5-tetramethyl-1,3,2-dioxaborolan-2-yl)ethyl)benzonitrile (6-*ortho*)**

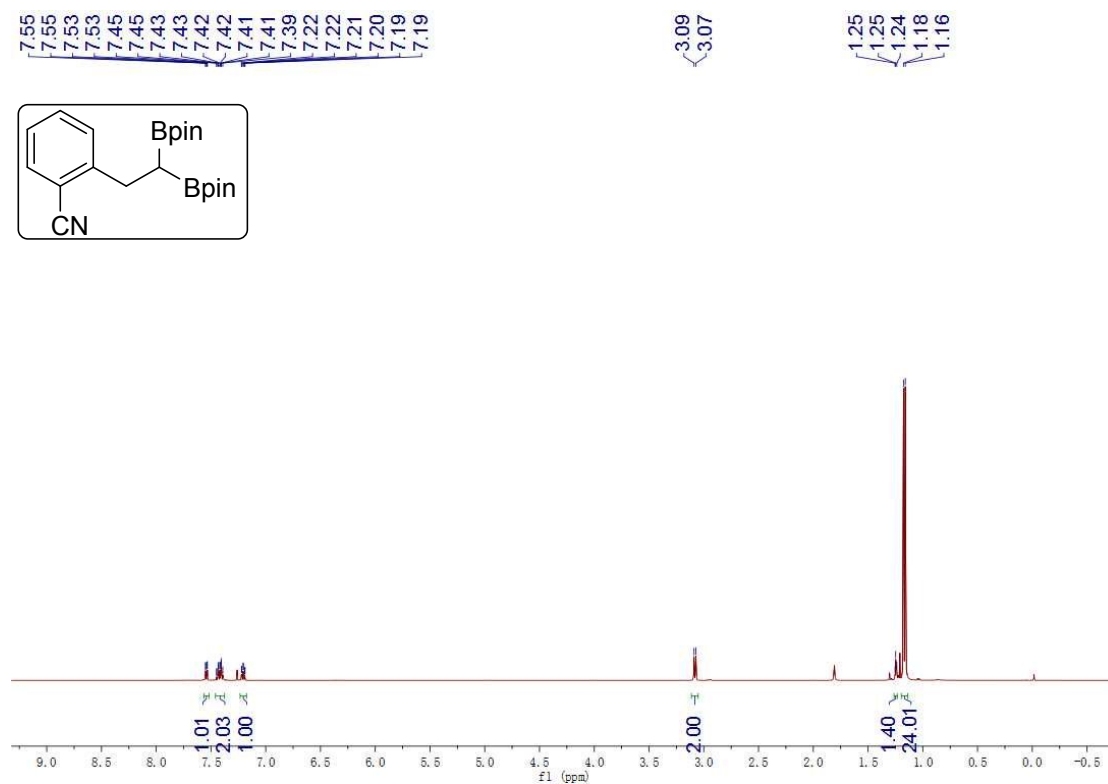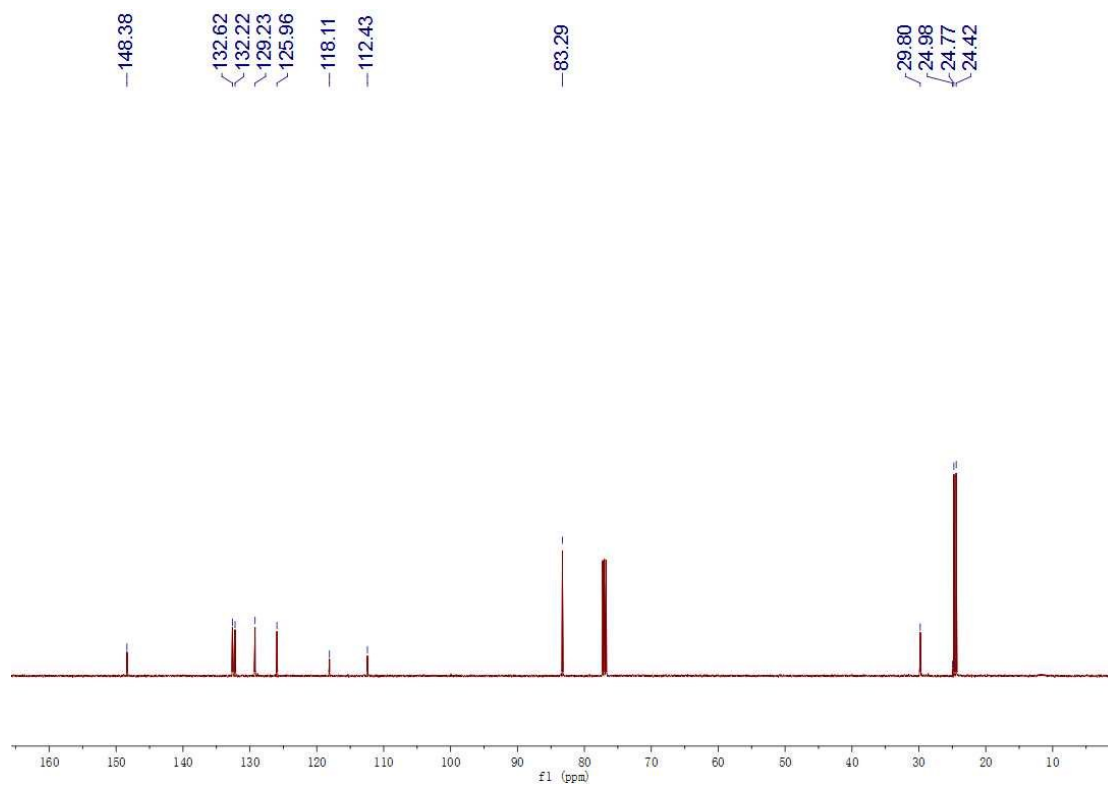

**1-(4-(2,2-Bis(4,4,5,5-tetramethyl-1,3,2-dioxaborolan-2-yl)ethyl)phenyl)ethan-1-one (6b)**

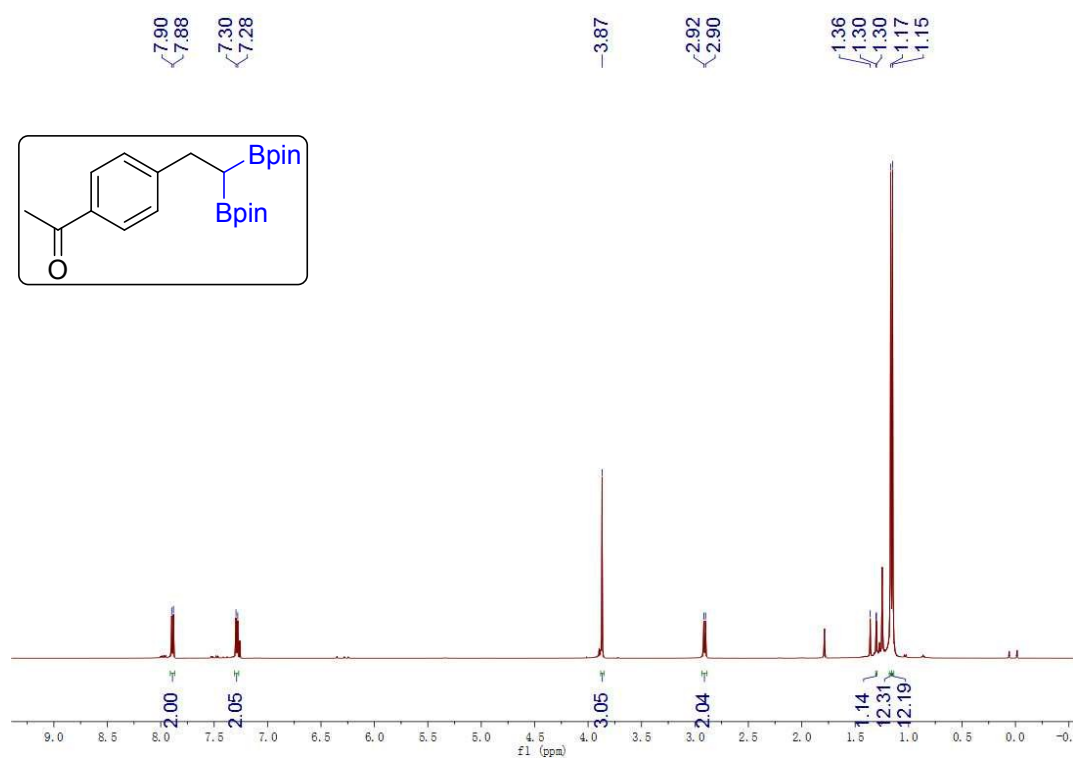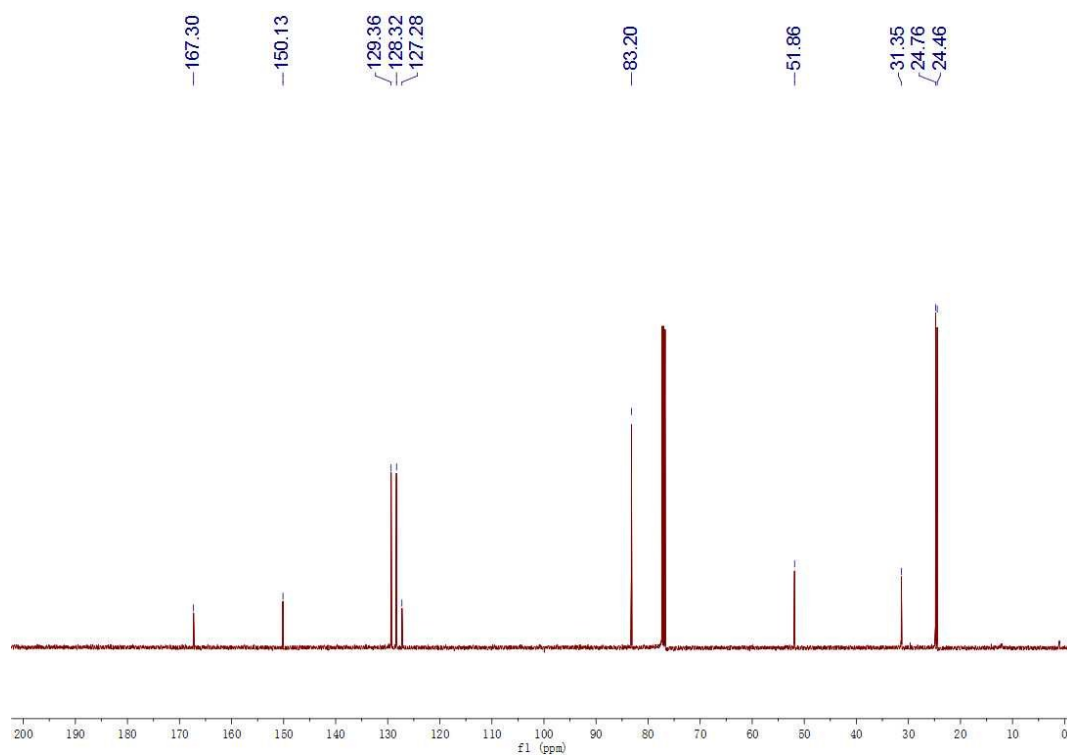



**Methyl 4-(2,2-bis(4,4,5,5-tetramethyl-1,3,2-dioxaborolan-2-yl)ethyl)benzoate (6c)**

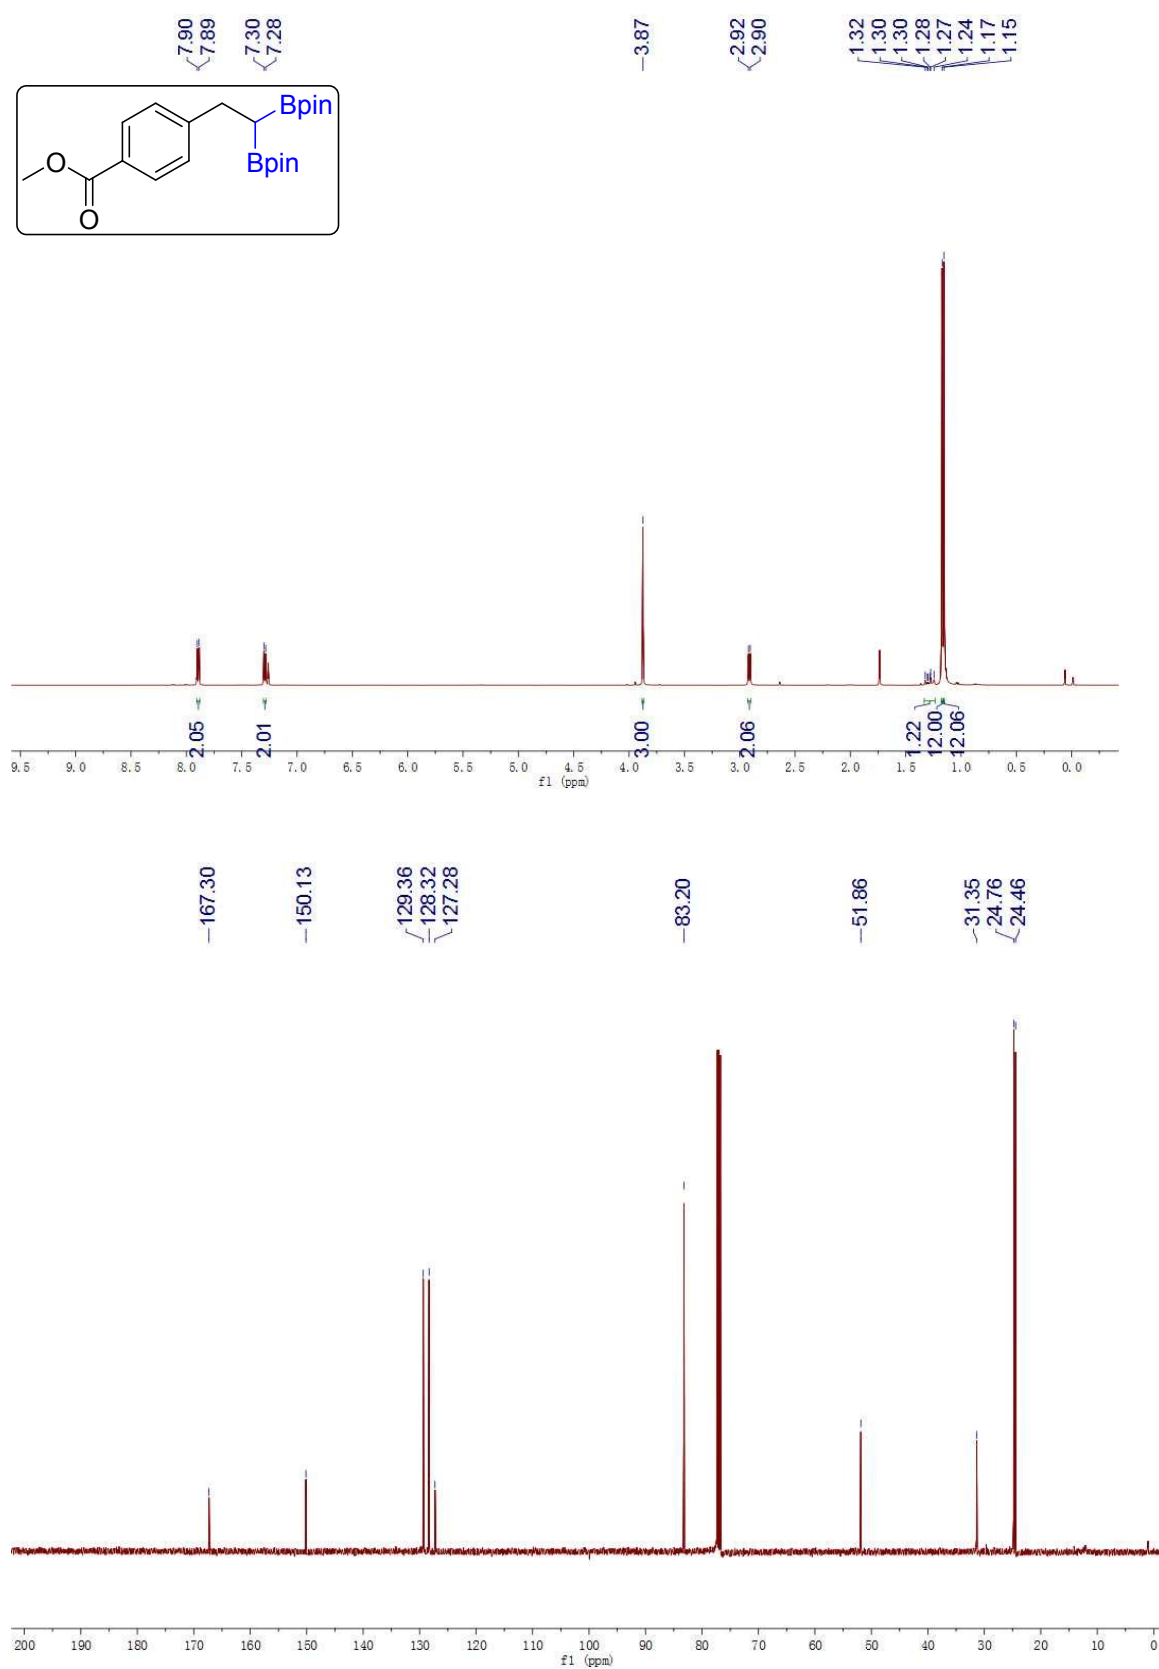

**2,2'-(2-(4-(Methylsulfonyl)phenyl)ethane-1,1-diyl)bis(4,4,5,5-tetramethyl-1,3,2-dioxaborolane) (6d)**

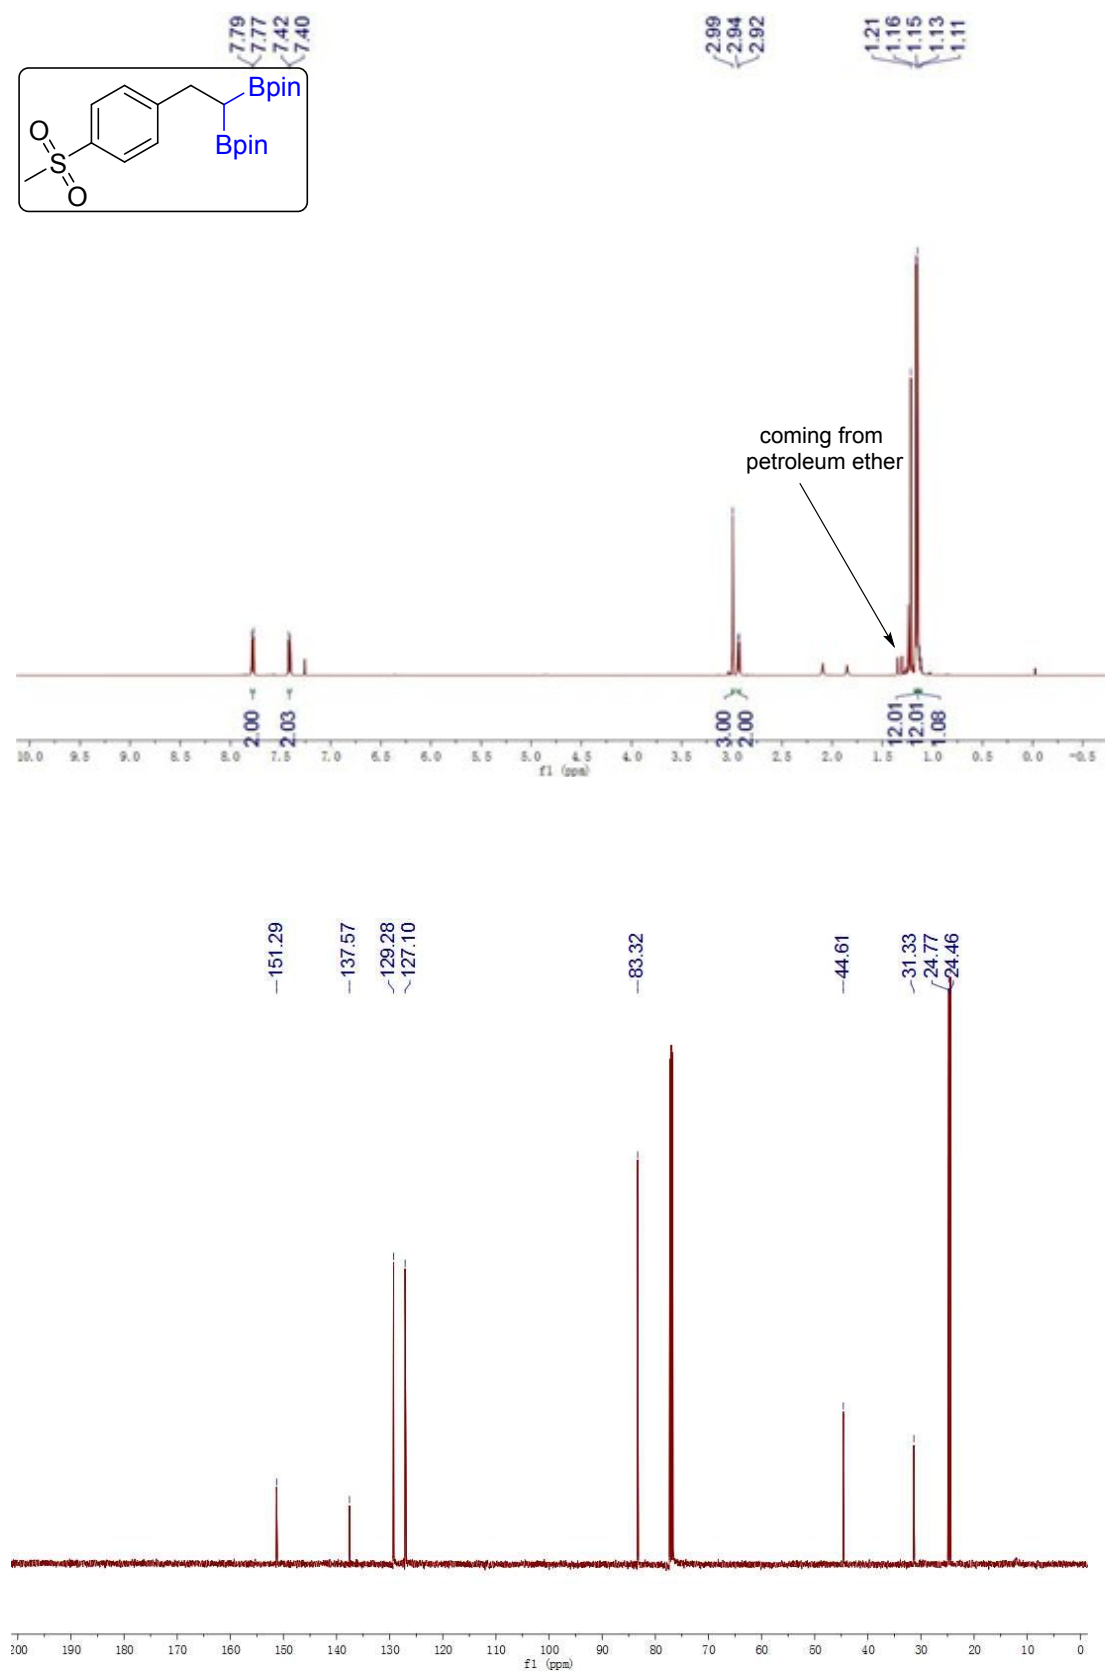

4-(2,2-Bis(4,4,5,5-tetramethyl-1,3,2-dioxaborolan-2-yl)propyl)benzonitrile (6e)

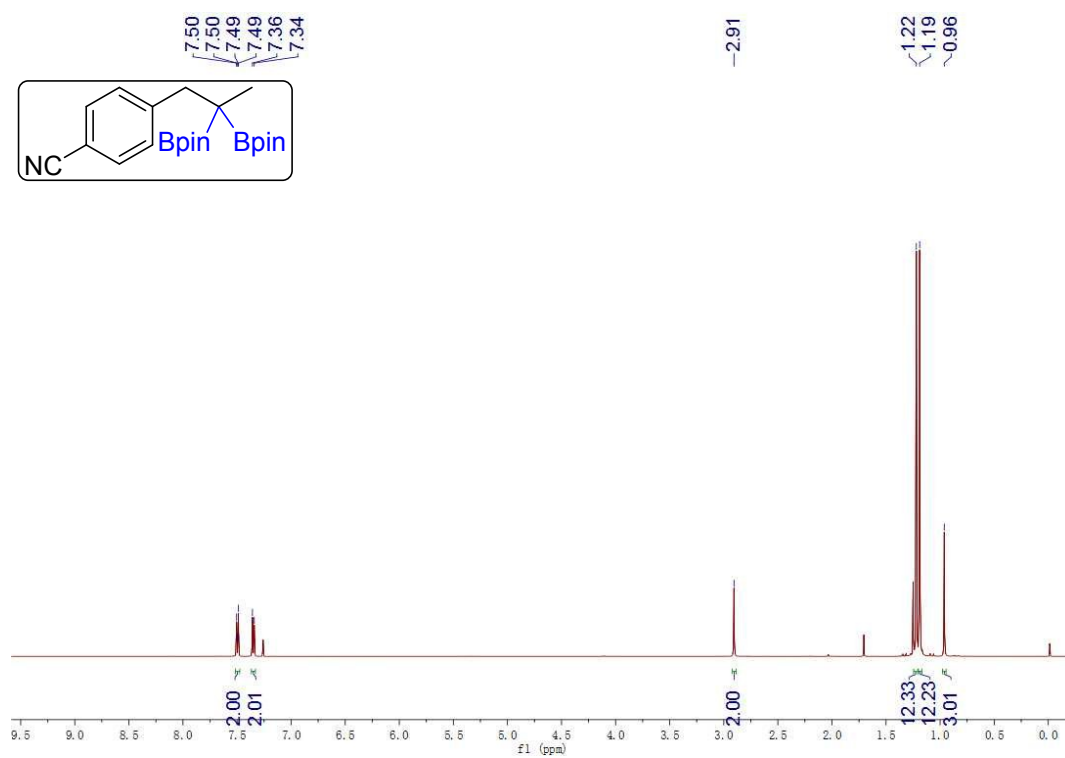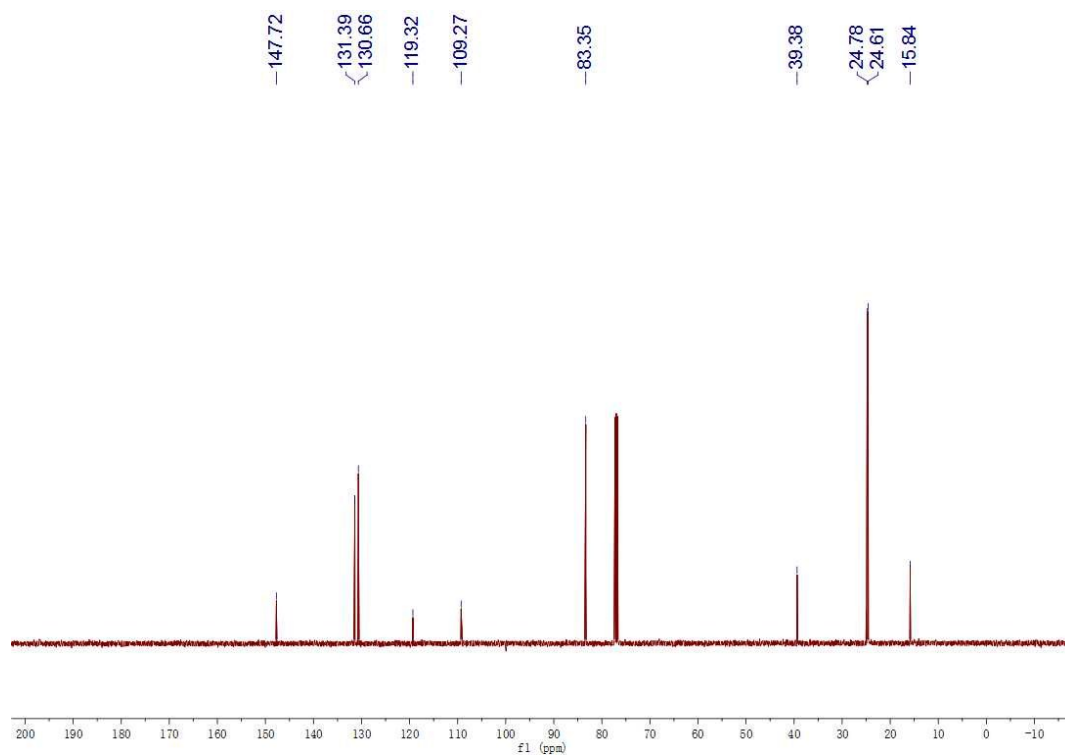

**1-(4-(2,2-Bis(4,4,5,5-tetramethyl-1,3,2-dioxaborolan-2-yl)propyl)phenyl)ethan-1-one (6f)**

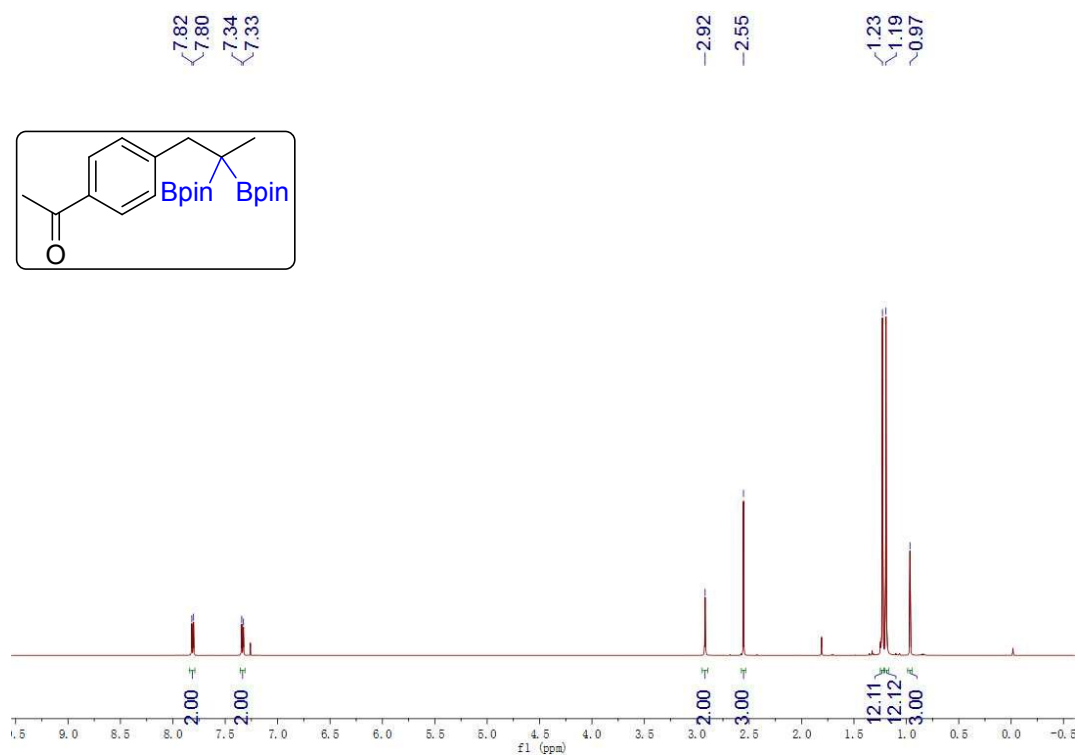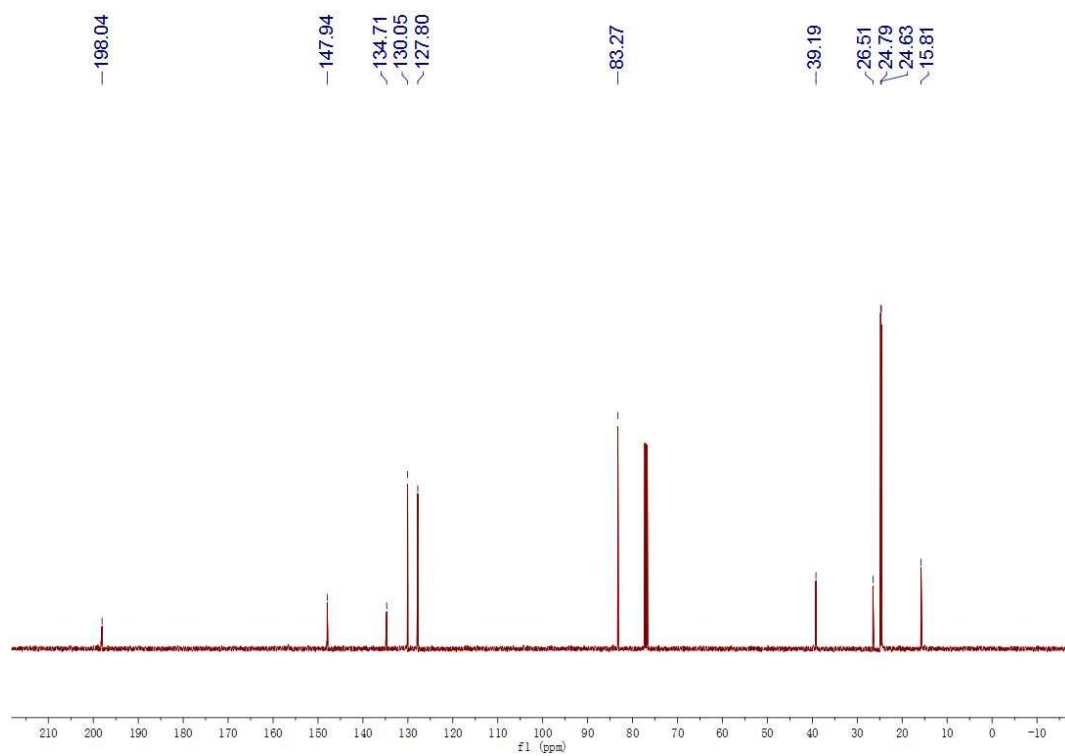

**1-(4-(2,2-Bis(4,4,5,5-tetramethyl-1,3,2-dioxaborolan-2-yl)propyl)phenyl)propan-1-one (6g)**

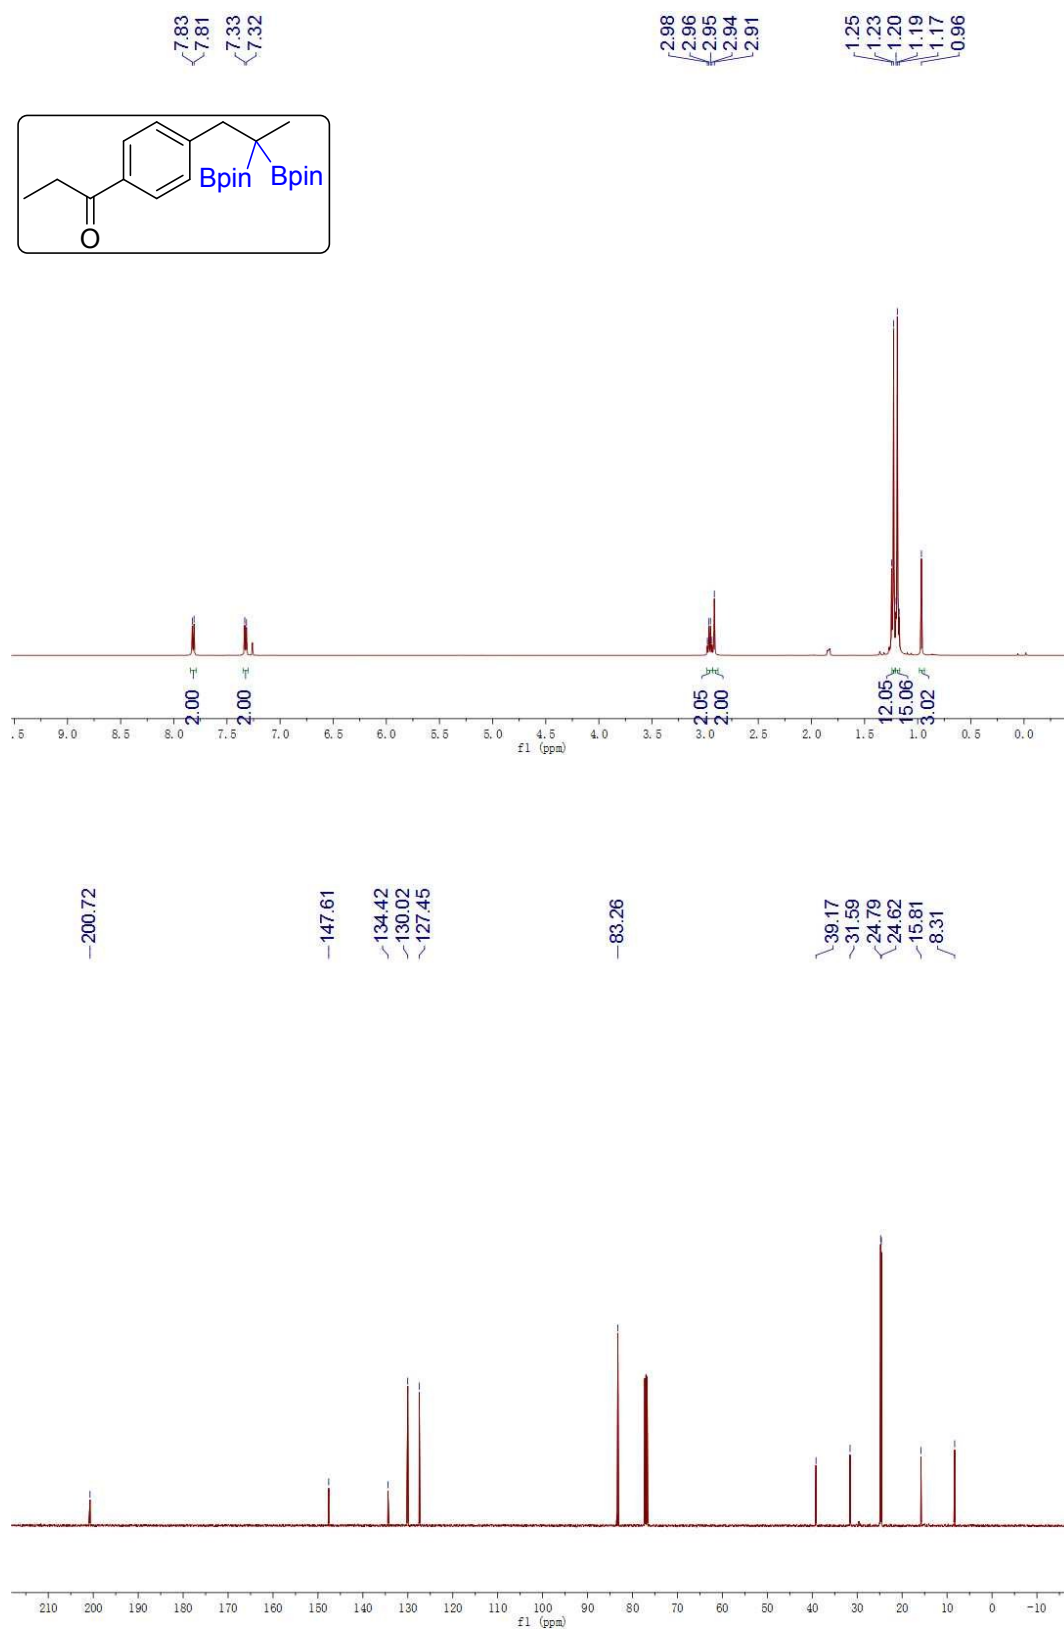

**2,2'-(1-(4-(Methylsulfonyl)phenyl)propane-2,2-diyl)bis(4,4,5,5-tetramethyl-1,3,2-dioxaborolane) (6h)**

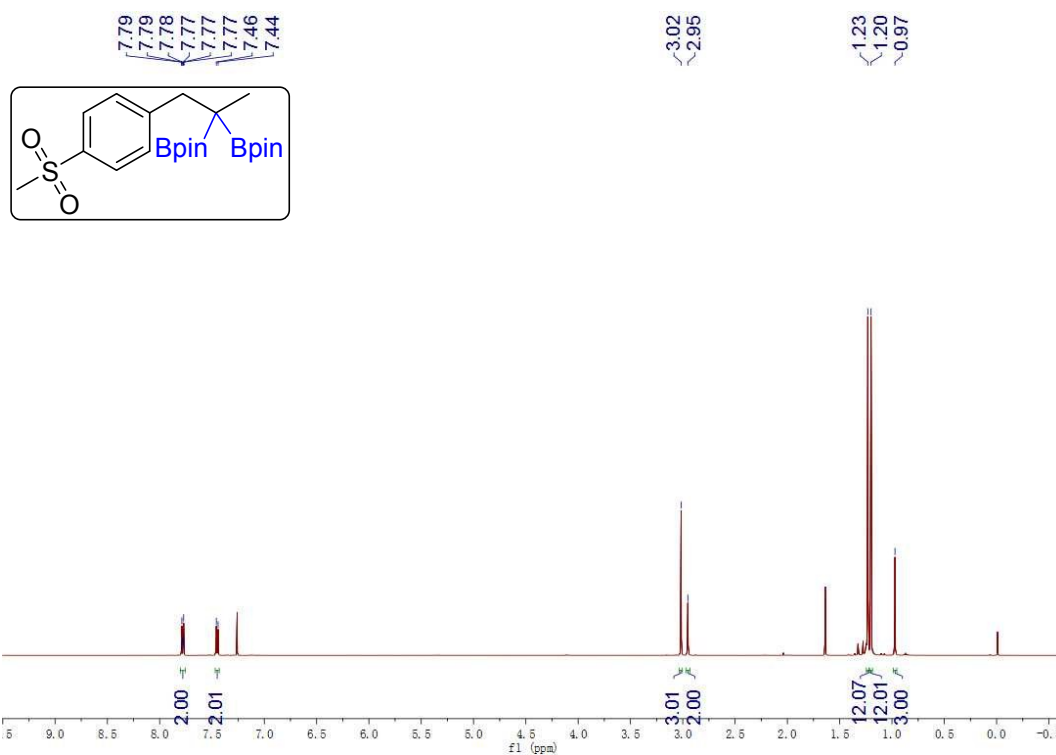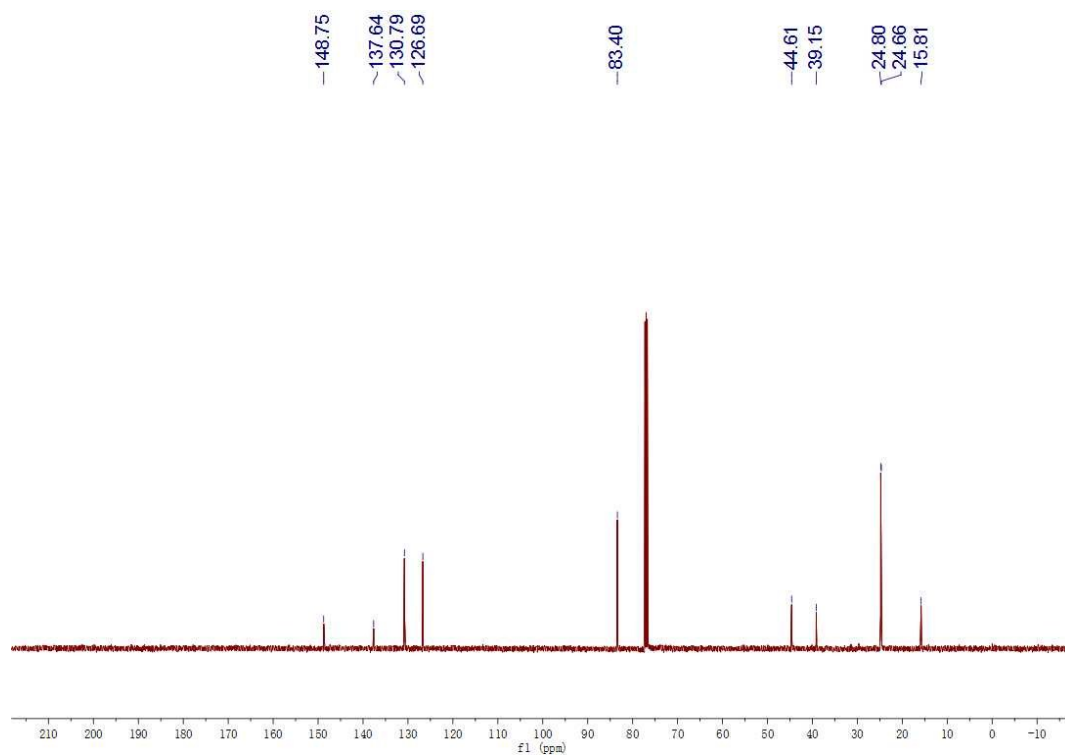

**Ethyl 4-(2,2-bis(4,4,5,5-tetramethyl-1,3,2-dioxaborolan-2-yl)propyl)benzoate (6i)**

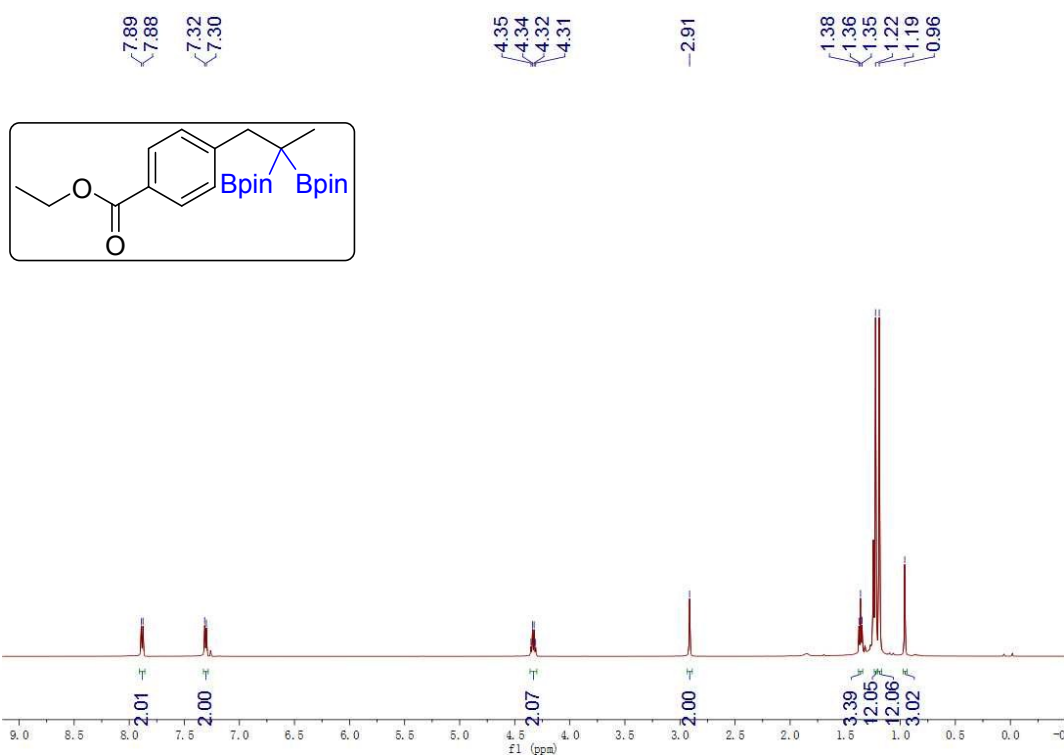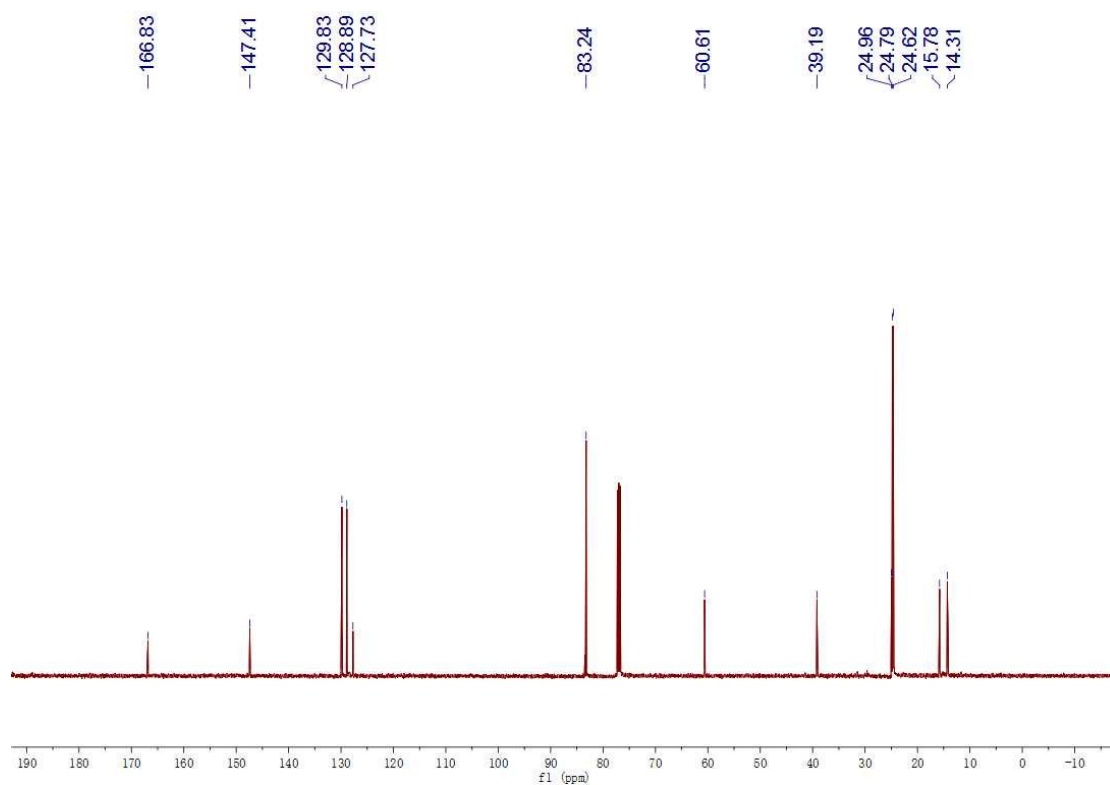

**Ethyl 3-(4-(2,2-bis(4,4,5,5-tetramethyl-1,3,2-dioxaborolan-2-yl)propyl)phenyl)-3-oxopropanoate (6j)**

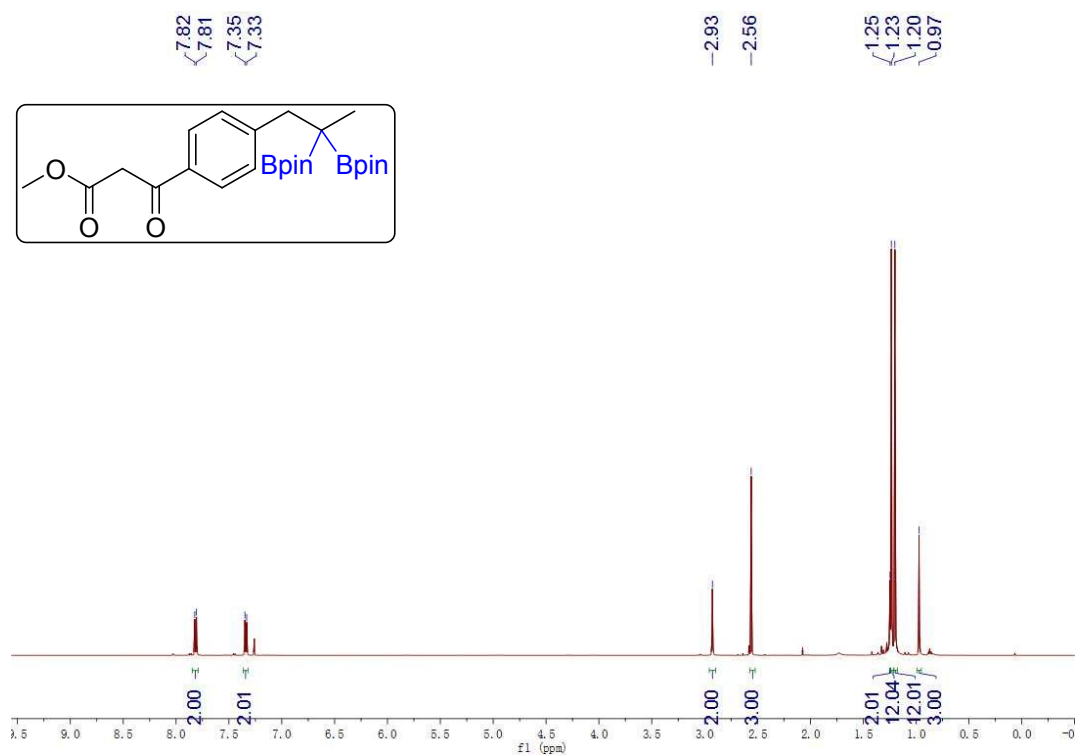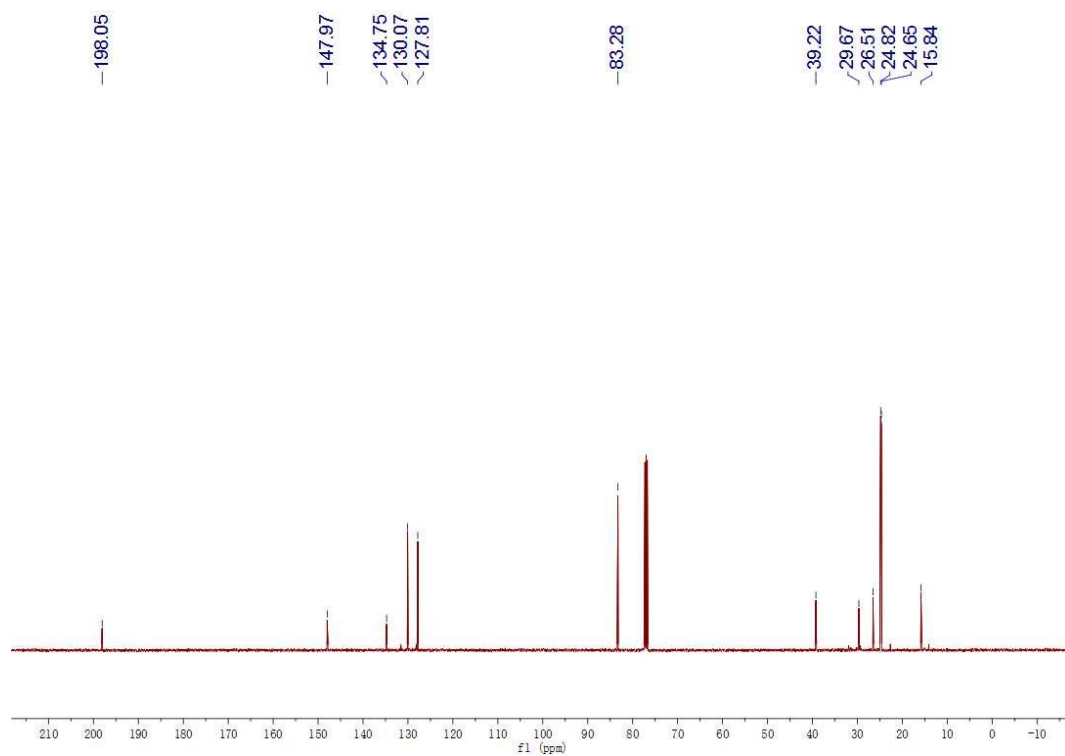



**2,2'-(2-(4-(trifluoromethyl)phenyl)ethane-1,1-diyl)bis(4,4,5,5-tetramethyl-1,3,2-dioxaborolane)(6k)**

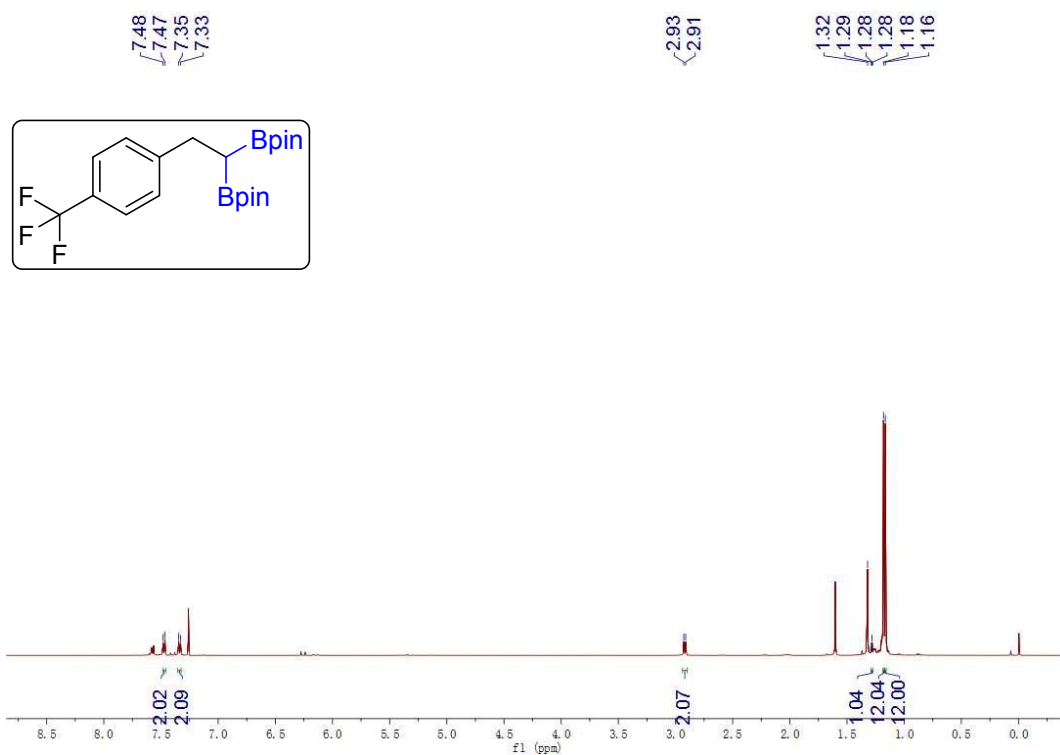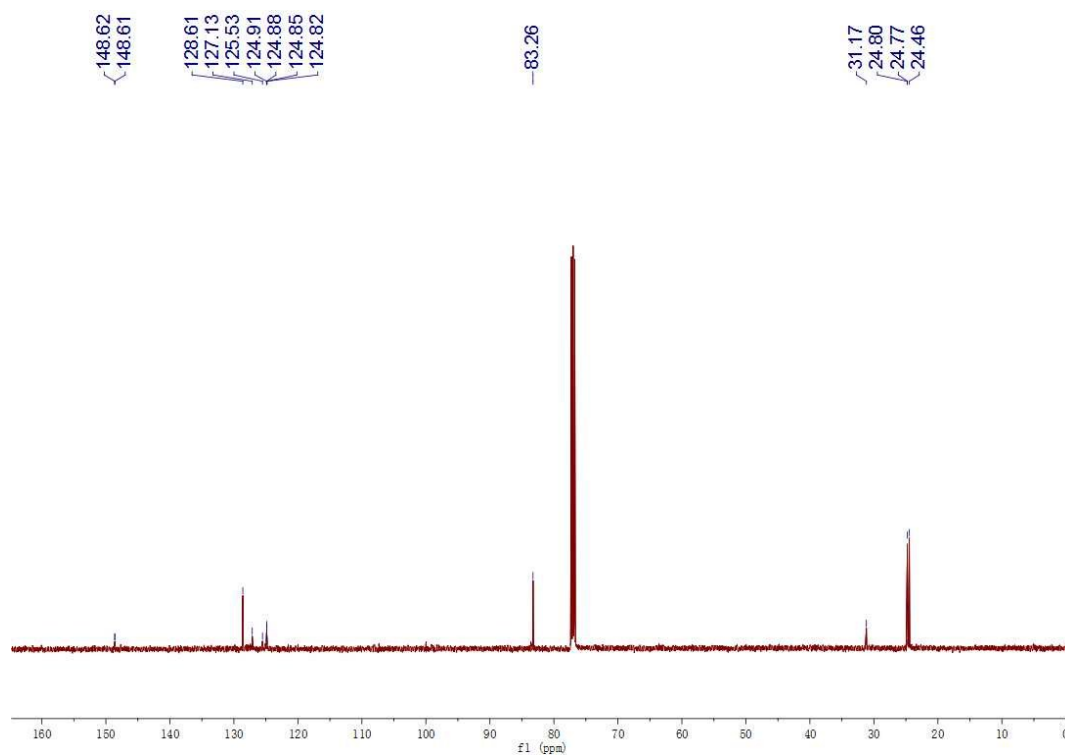

**2,2',2''-(2-(4-(trifluoromethyl)phenyl)ethane-1,1,2-triyl)tris(4,4,5,5-tetramethyl-1,3,2-dioxaborolane)(6'a)**

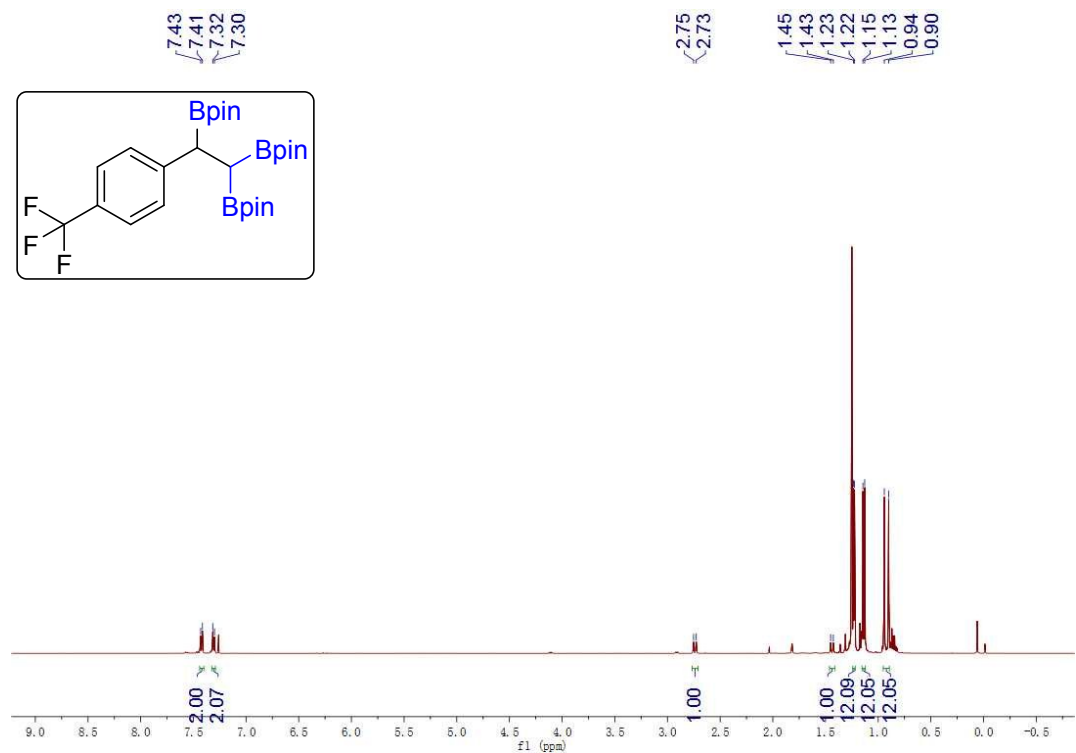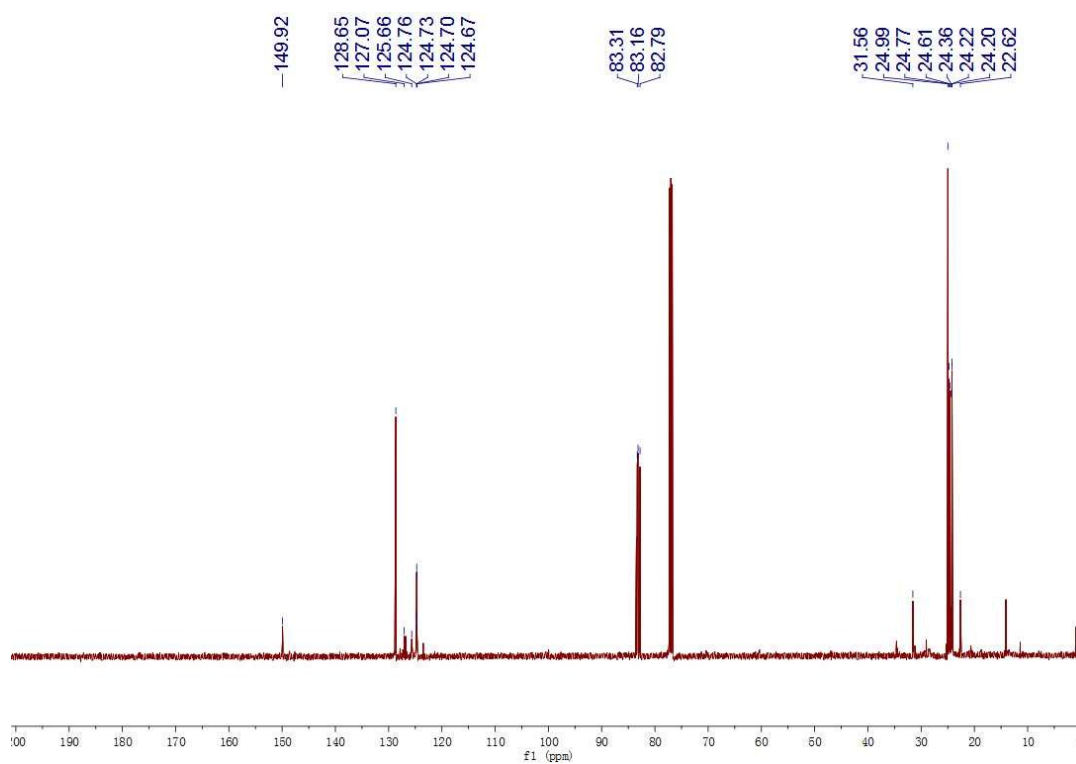

**2,2',2''-(2-(4-fluorophenyl)ethane-1,1,2-triyl)tris(4,4,5,5-tetramethyl-1,3,2-dioxaborolane)(6'b)**

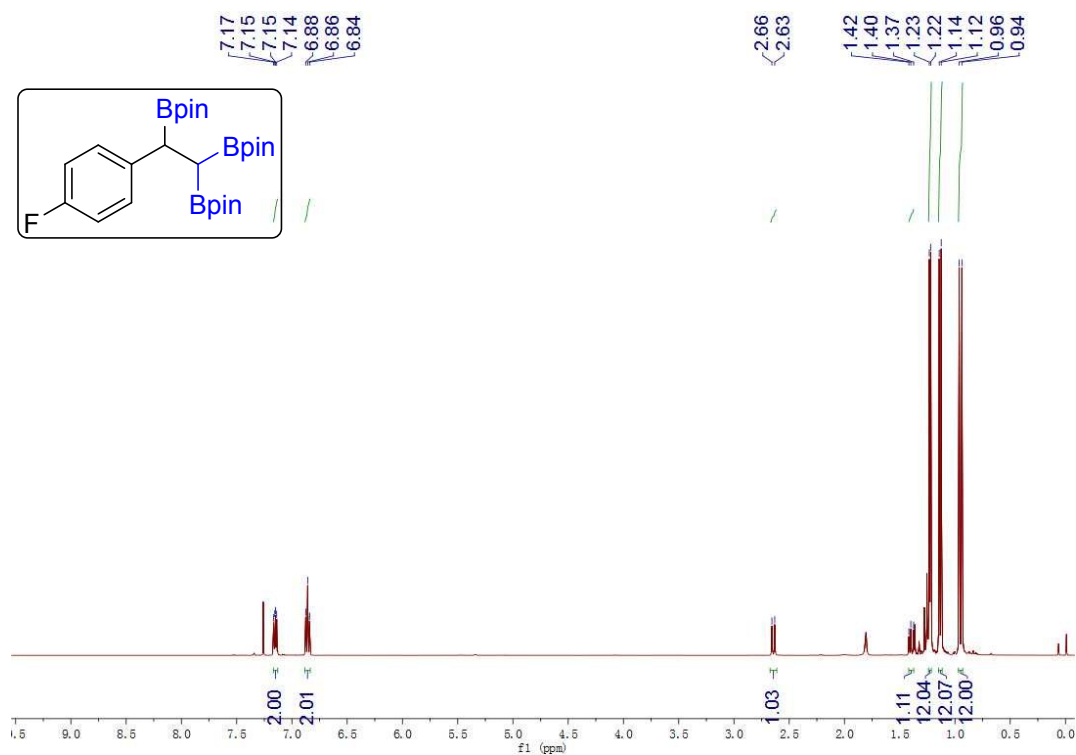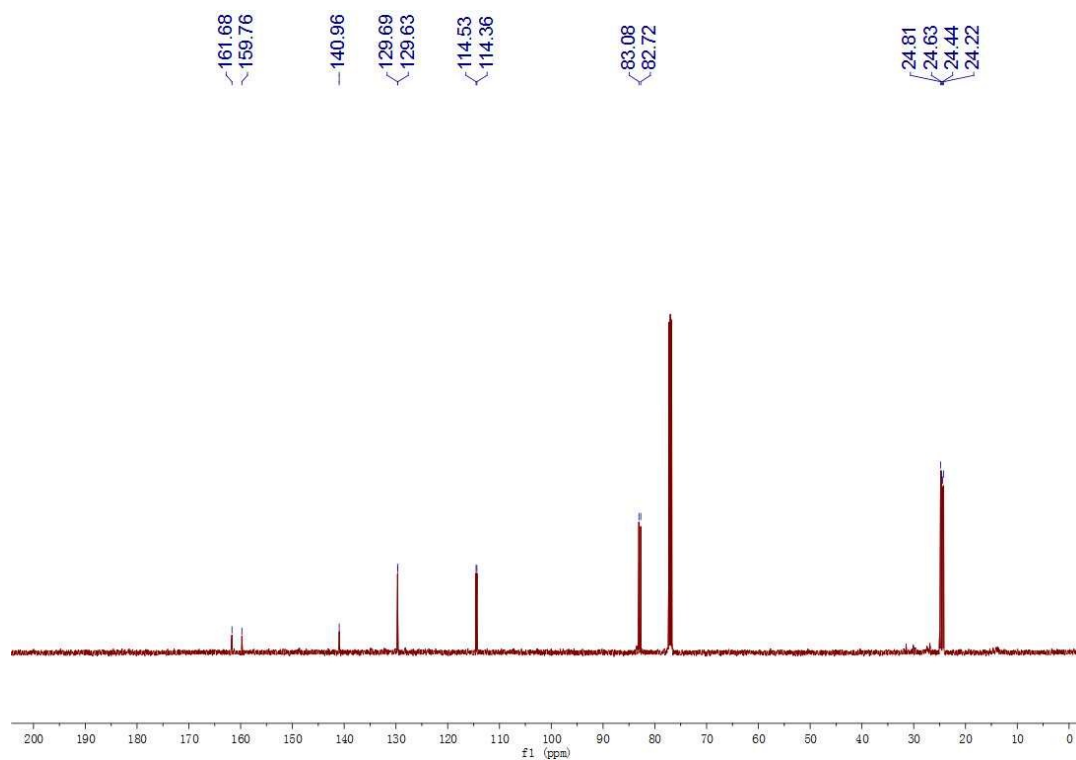

**2,2',2''-(2-(4-bromophenyl)ethane-1,1,2-triyl)tris(4,4,5,5-tetramethyl-1,3,2-dioxaborolane)(6'c)**

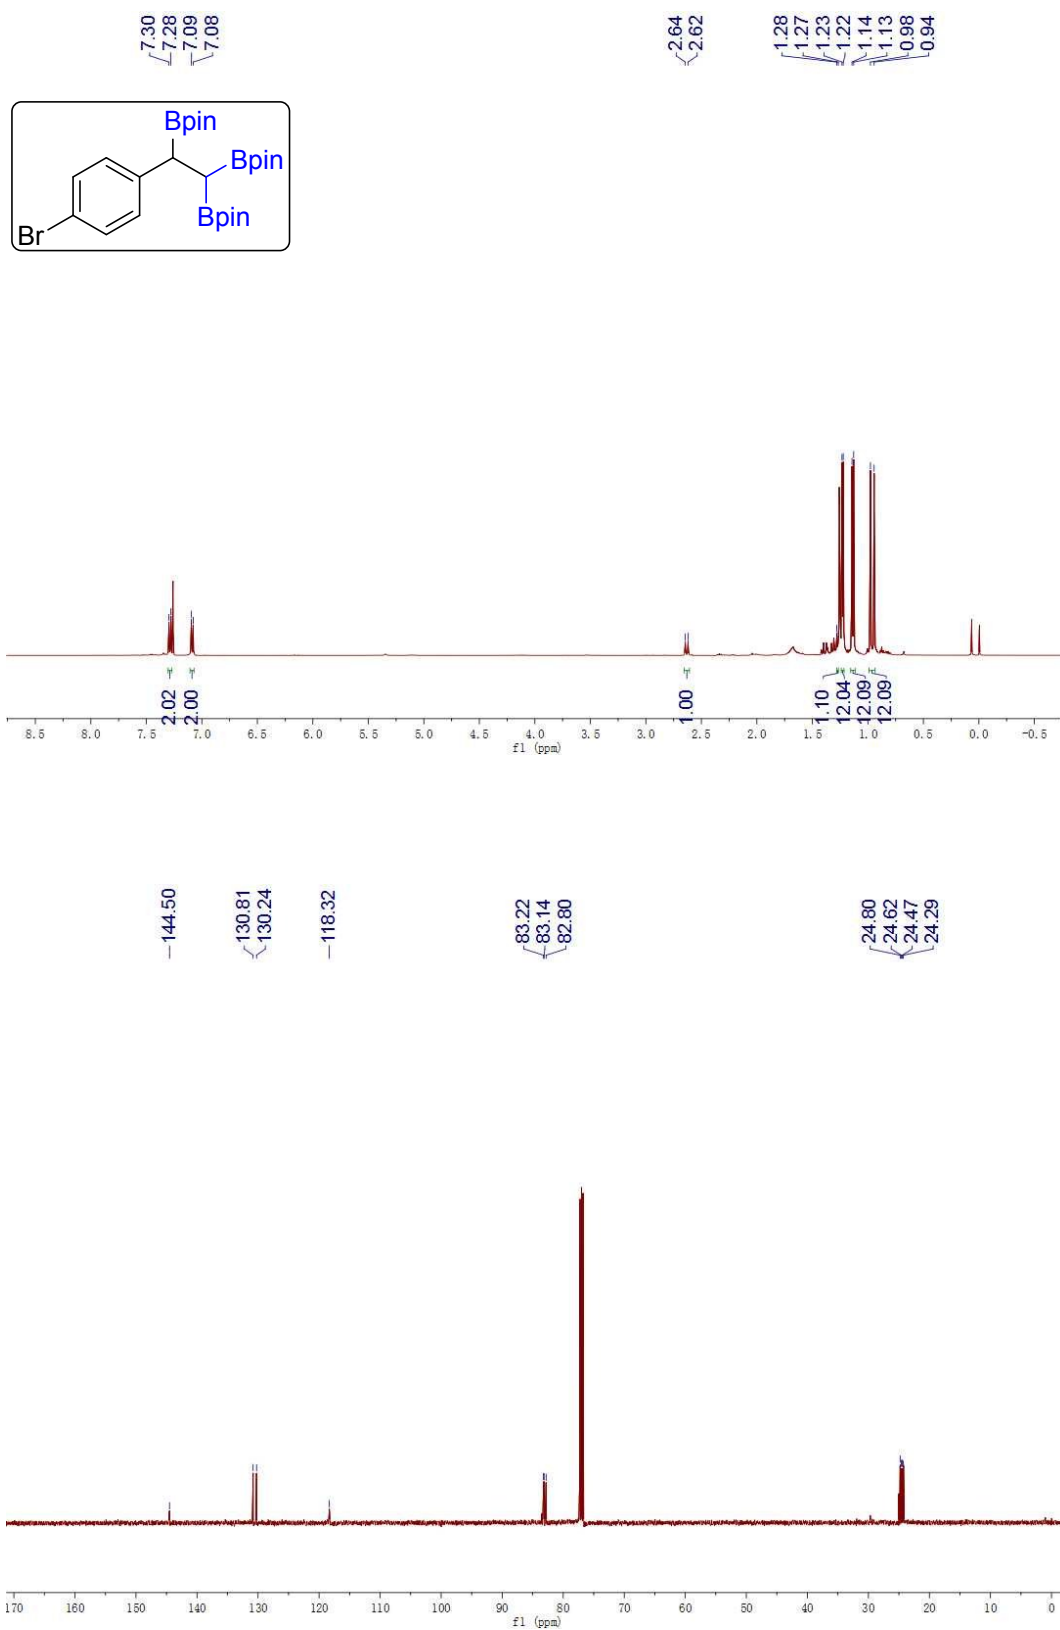

**Chemical Structure:** 1,1-dibiphenyl-4-cyanobenzene

**<sup>1</sup>H NMR Data (CDCl<sub>3</sub>):**

| Chemical Shift (ppm)                                                         | Integration                    |
|------------------------------------------------------------------------------|--------------------------------|
| 7.52, 7.45, 7.44, 7.43, 7.36, 7.36, 7.35, 7.34, 7.34, 7.29, 7.27, 7.26, 7.26 | 1.03, 1.13, 1.00, 1.28         |
| 2.72, 2.70                                                                   | 1.00                           |
| 1.40, 1.37, 1.35, 1.23, 1.22, 1.15, 1.13, 0.97, 0.93                         | 1.25, 12.36, 12.03, 6.00, 6.00 |

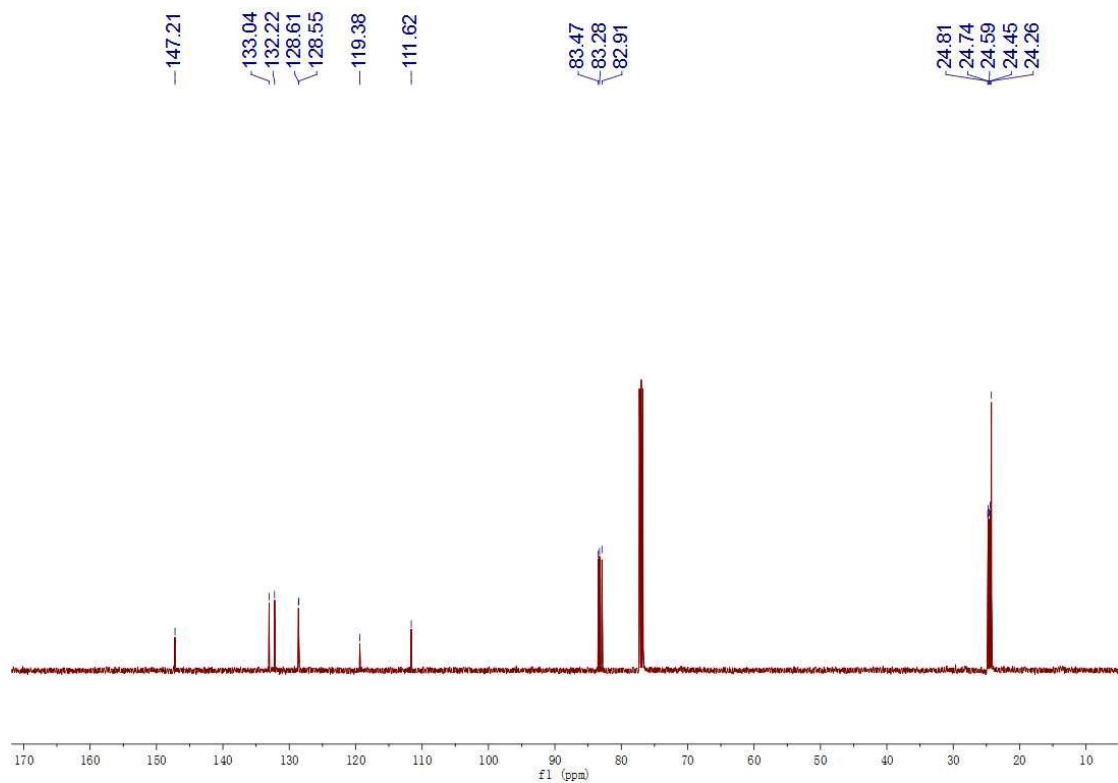

(61)<sup>15</sup>

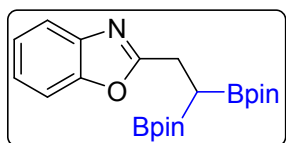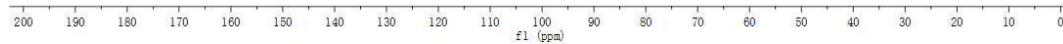

**2-(2,2-bis(4,4,5,5-tetramethyl-1,3,2-dioxaborolan-2-yl)ethyl)benzo[d]thiazole (6m)**

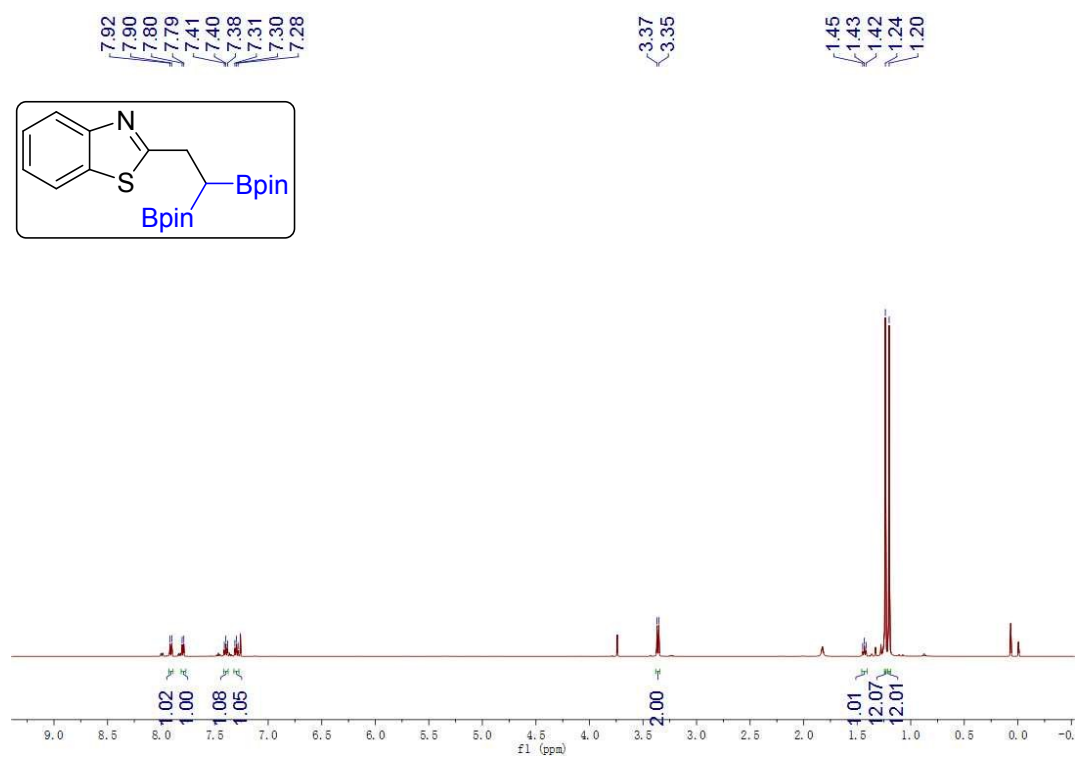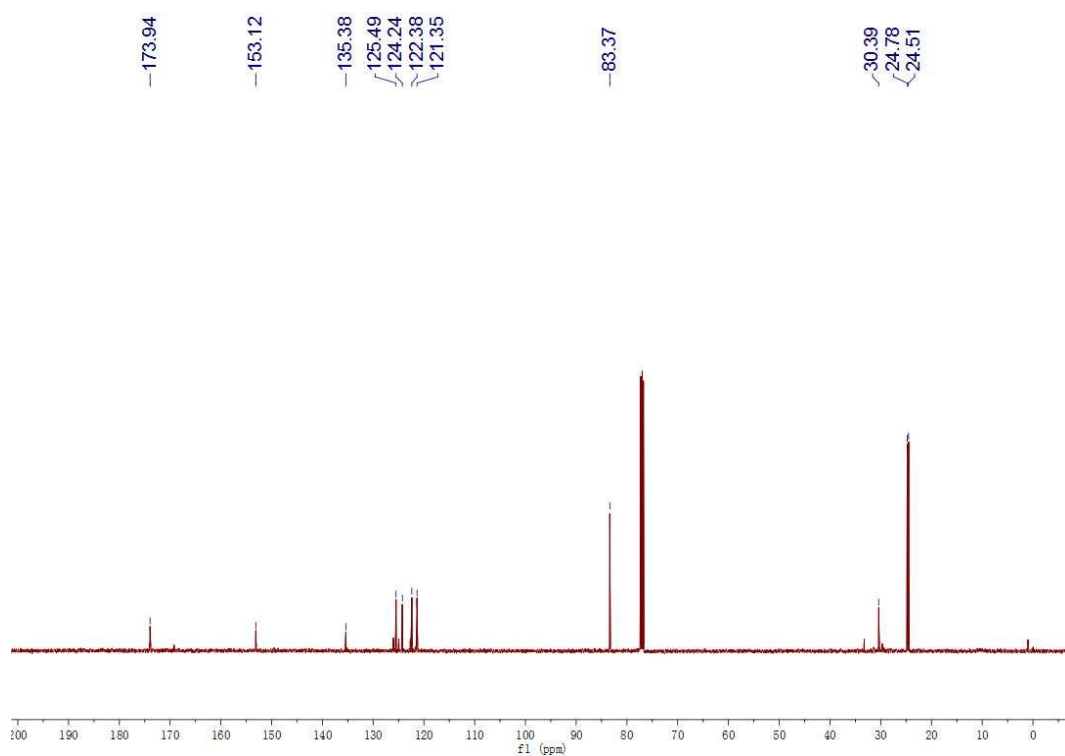

**4,4,5,5-tetramethyl-2-(1-(4-(methylsulfonyl)phenyl)hex-1-en-2-yl)-1,3,2-dioxaborolane (6n)**

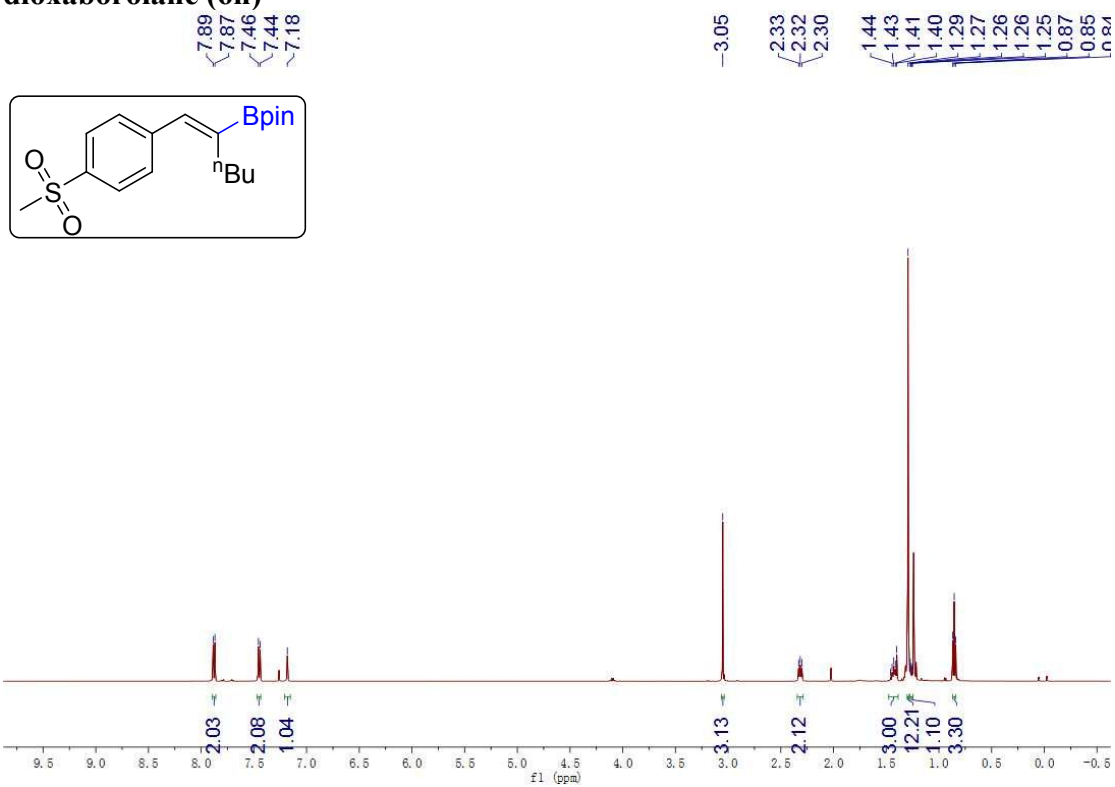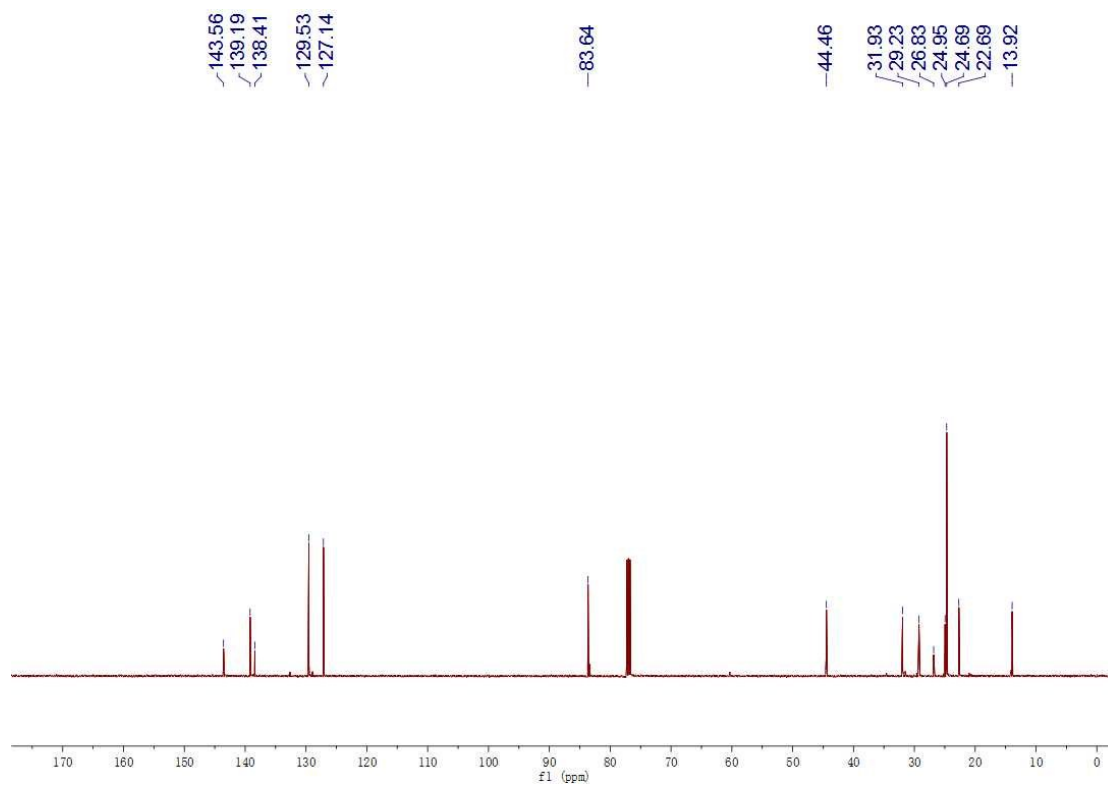



**4,4,5,5-tetramethyl-2-(1-(4-(methylsulfonyl)phenyl)-5-phenylpent-1-en-2-yl)-1,3,2-dioxaborolane (6o)**

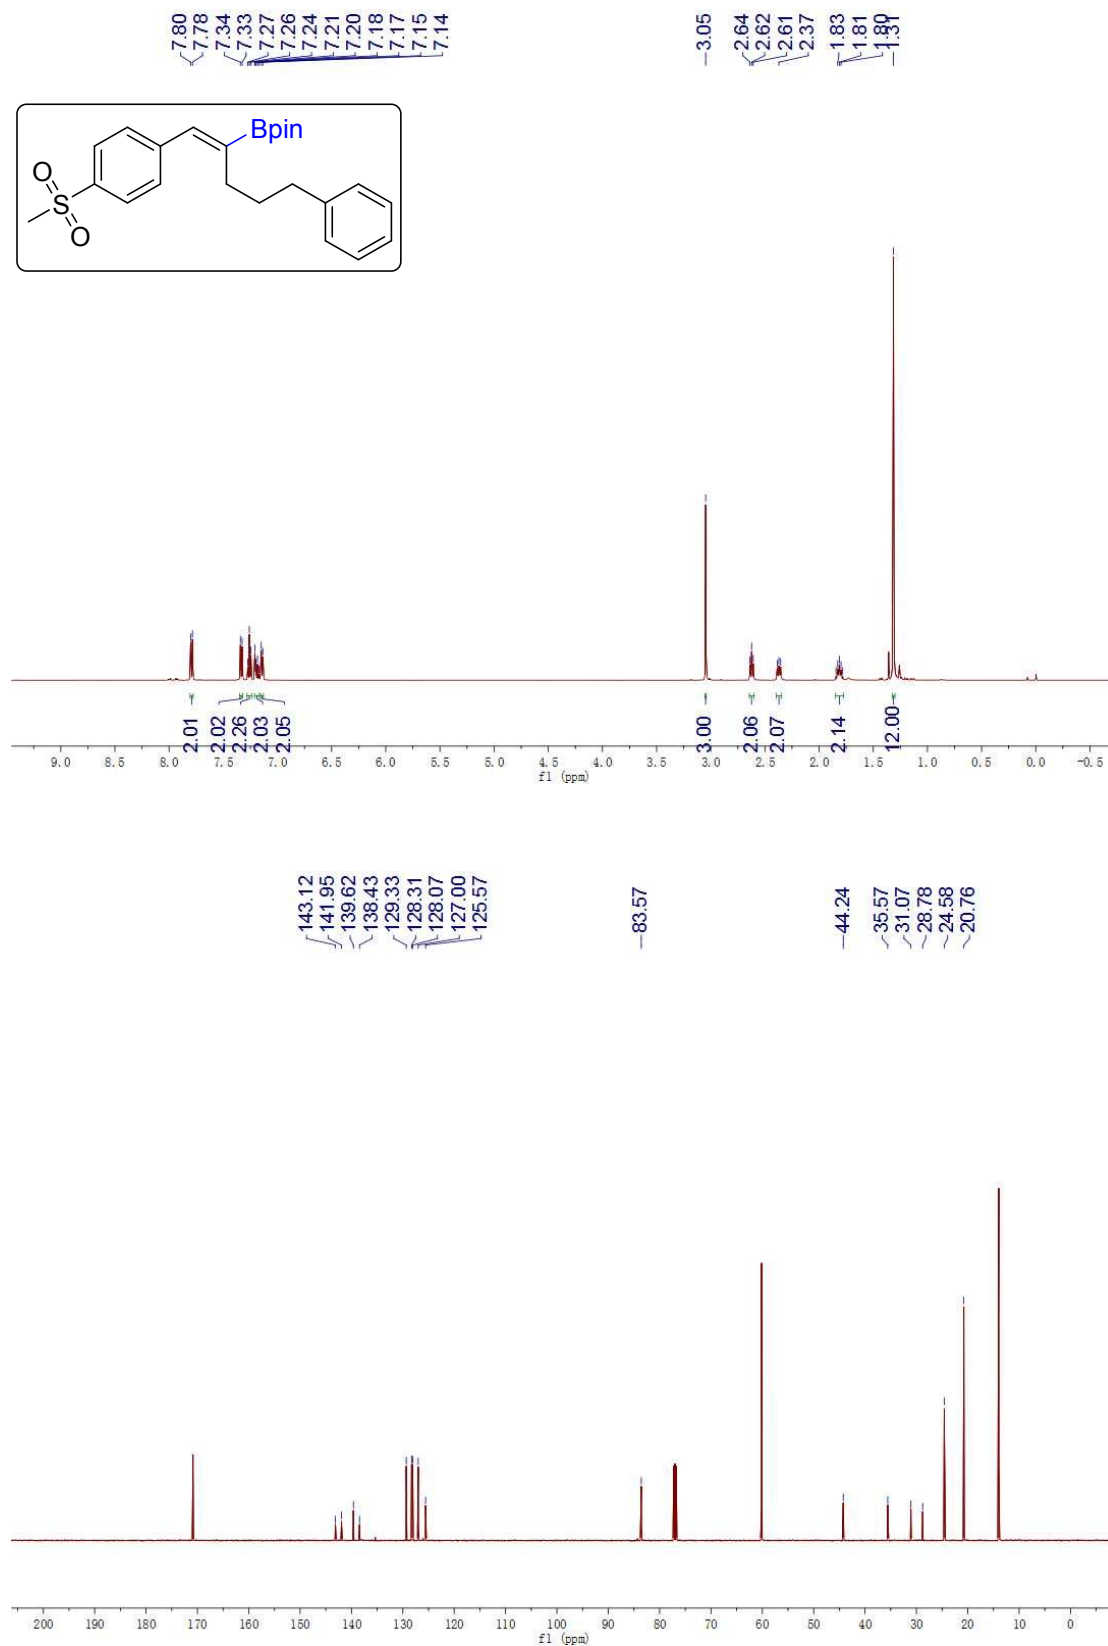

ethyl -4-(2-(4,4,5,5-tetramethyl-1,3,2-dioxaborolan-2-yl)pent-1-en-1-yl)benzoate  
(6p)

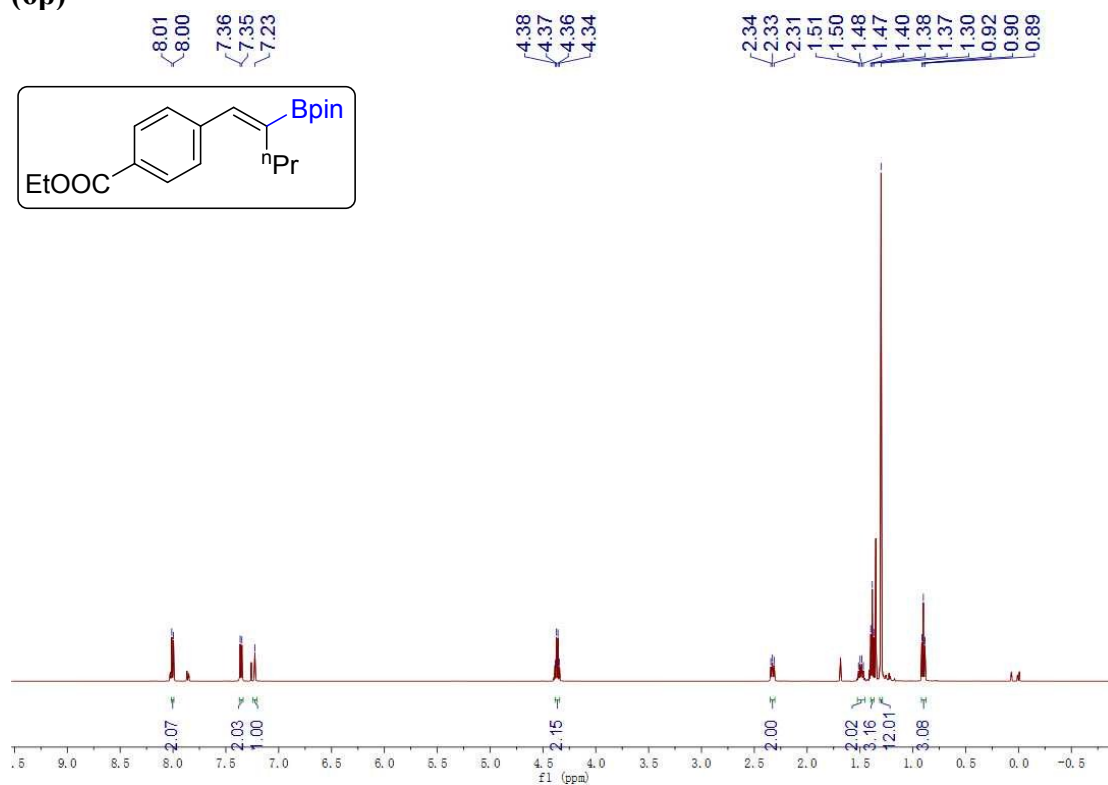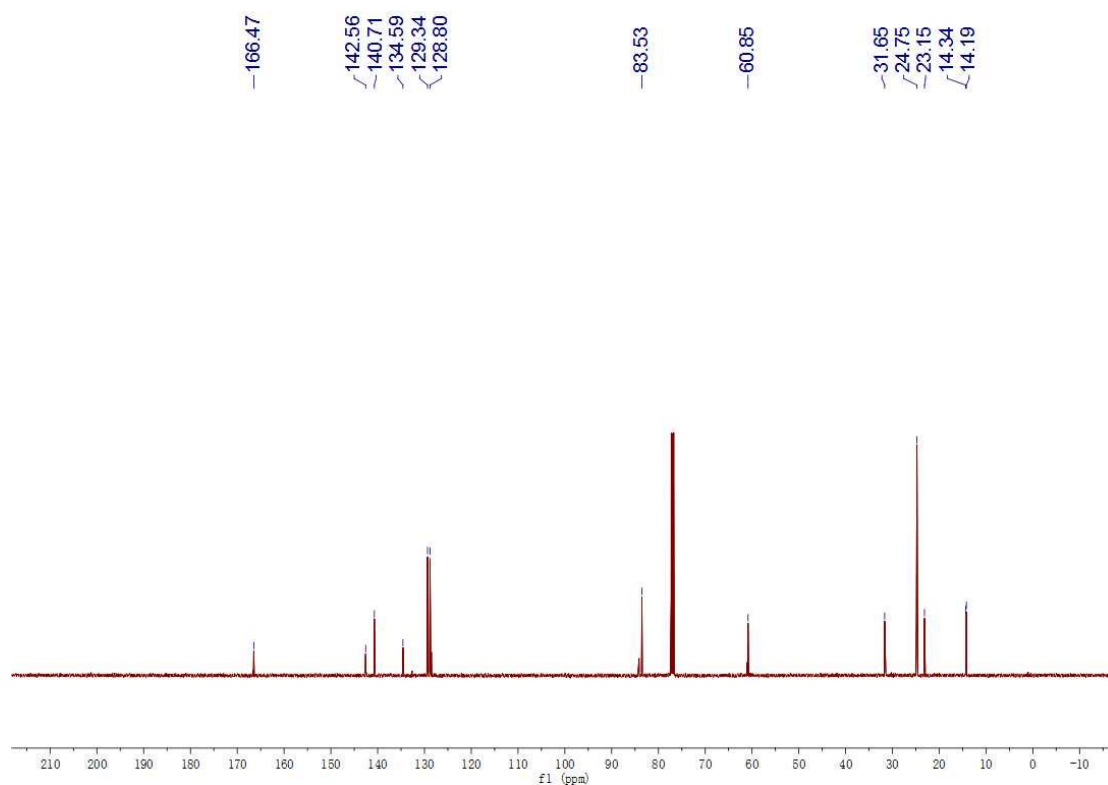

| Year       | 2000 | 2001 | 2002 | 2003 | 2004 | 2005 | 2006 | 2007 | 2008 | 2009 | 2010 | 2011 | 2012 | 2013 | 2014 | 2015 | 2016 | 2017 | 2018 | 2019 | 2020 | 2021 | 2022 | 2023 | 2024 | 2025 | 2026 | 2027 | 2028 | 2029 | 2030 |
|------------|------|------|------|------|------|------|------|------|------|------|------|------|------|------|------|------|------|------|------|------|------|------|------|------|------|------|------|------|------|------|------|
| Population | 7.90 | 7.88 | 7.32 | 7.30 | 5.56 | 5.55 | 4.63 | 4.63 | 4.50 | 4.49 | 4.40 | 4.38 | 4.34 | 4.33 | 4.33 | 4.33 | 4.33 | 4.31 | 1.50 | 1.46 | 1.34 | 1.32 | 1.23 | 1.19 | 0.96 |      |      |      |      |      |      |

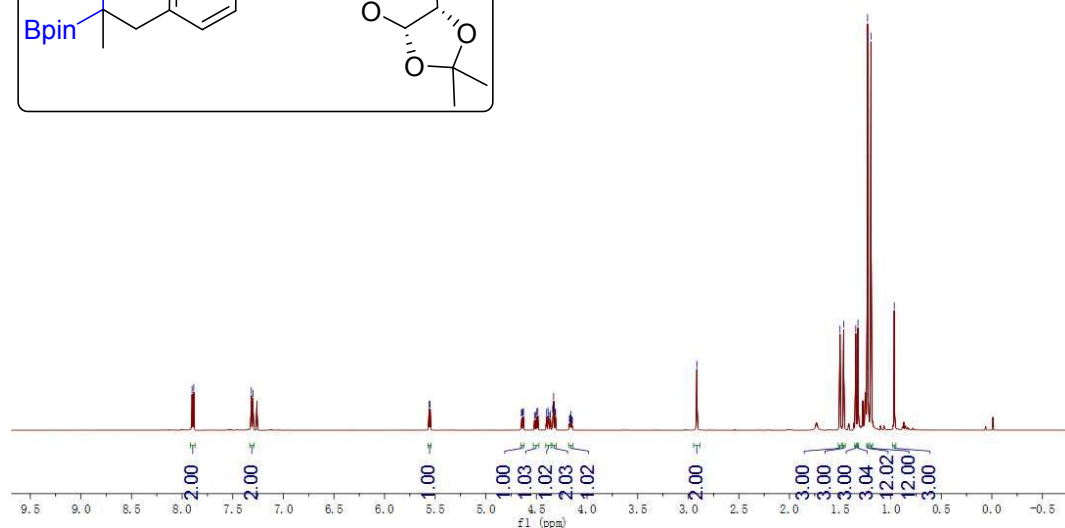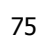

2-((1S,4R)-7,7-dimethylbicyclo[2.2.1]hept-2-en-2-yl)ethyl  
tetramethyl-1,3,2-dioxaborolan-2-yl)propyl)benzoate (6r)

4-(2,2-bis(4,4,5,5-

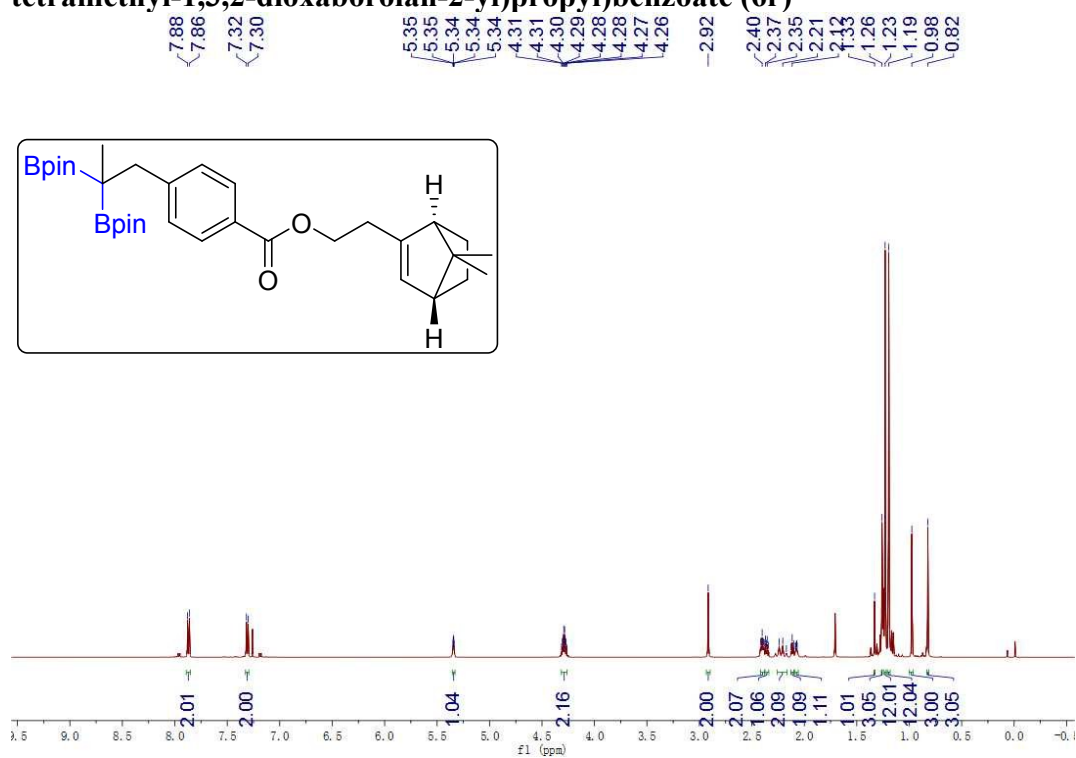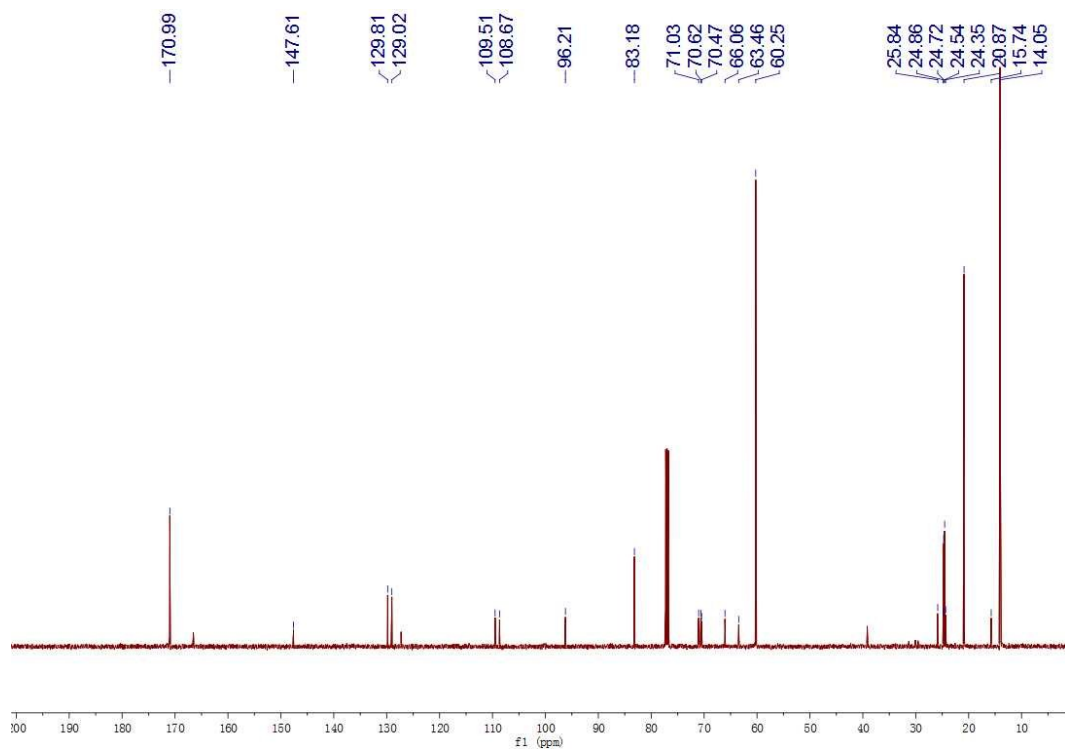

**(E)-3,7-dimethylocta-2,6-dien-1-yl 4-(2,2-bis(4,4,5,5-tetramethyl-1,3,2-dioxaborolan-2-yl)ethyl)benzoate (6s)**

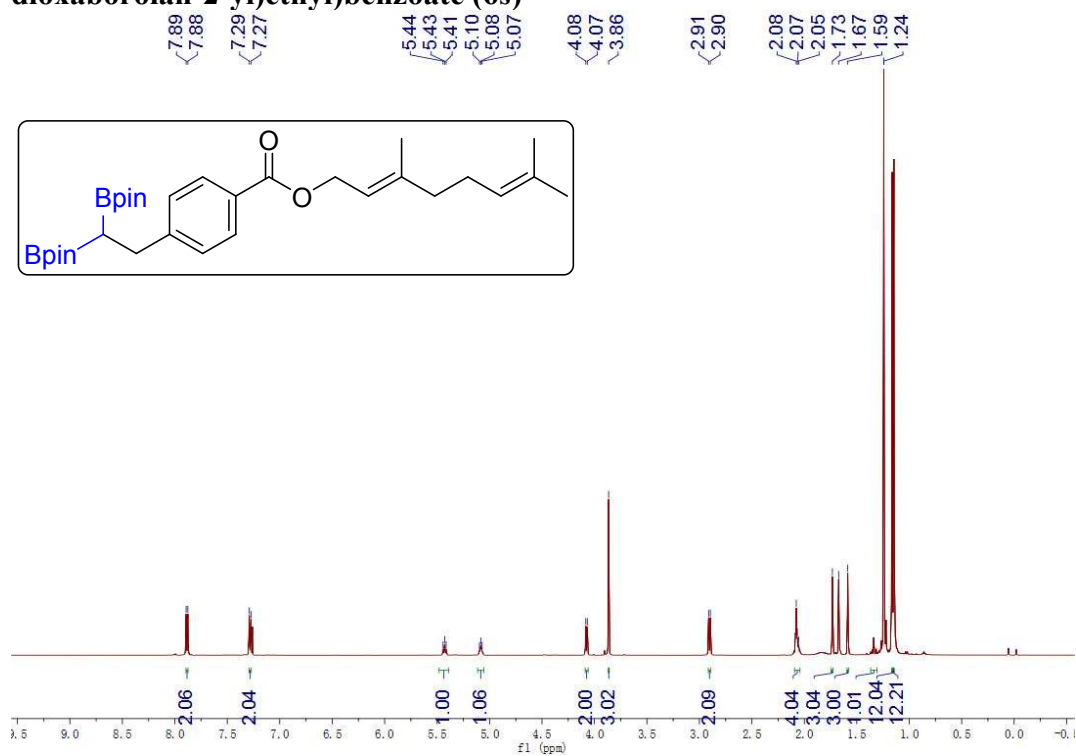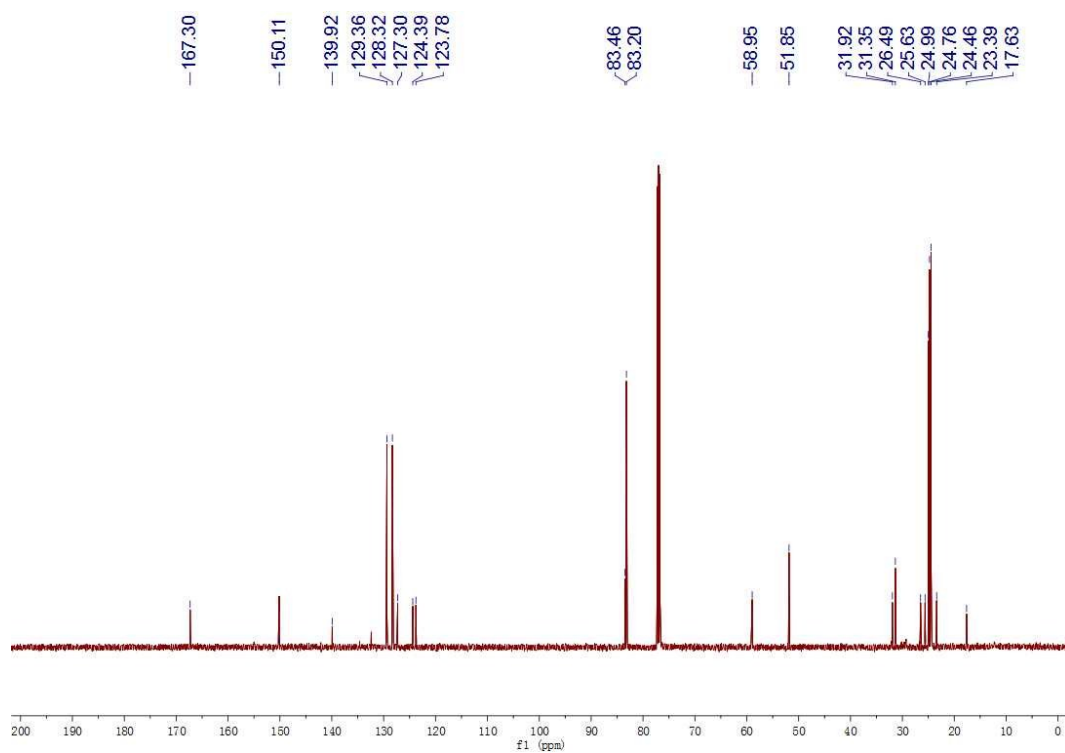

0.90  
0.89  
0.78  
0.77

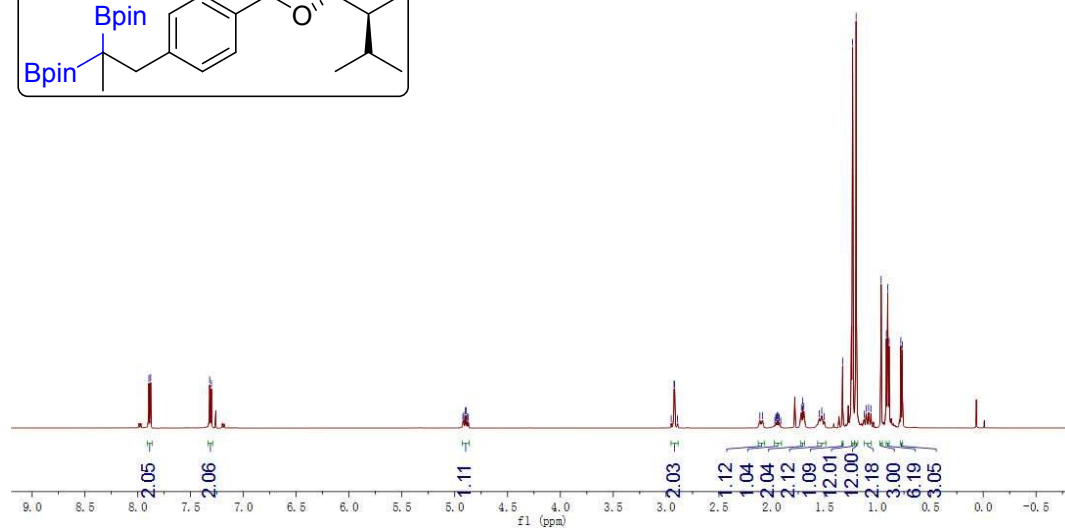

**(3S,8R,9S,10R,13S,14S)-10,13-dimethyl-17-oxo2,3,4,7,8,9,10,11,12,13,14,15,16,17-tetradecahydro-1H-cyclopenta[a]phenanthren-3-yl 4-(2,2-bis(4,4,5,5-tetramethyl-1,3,2-dioxaborolan-2-yl)propyl)benzoate (6u)**

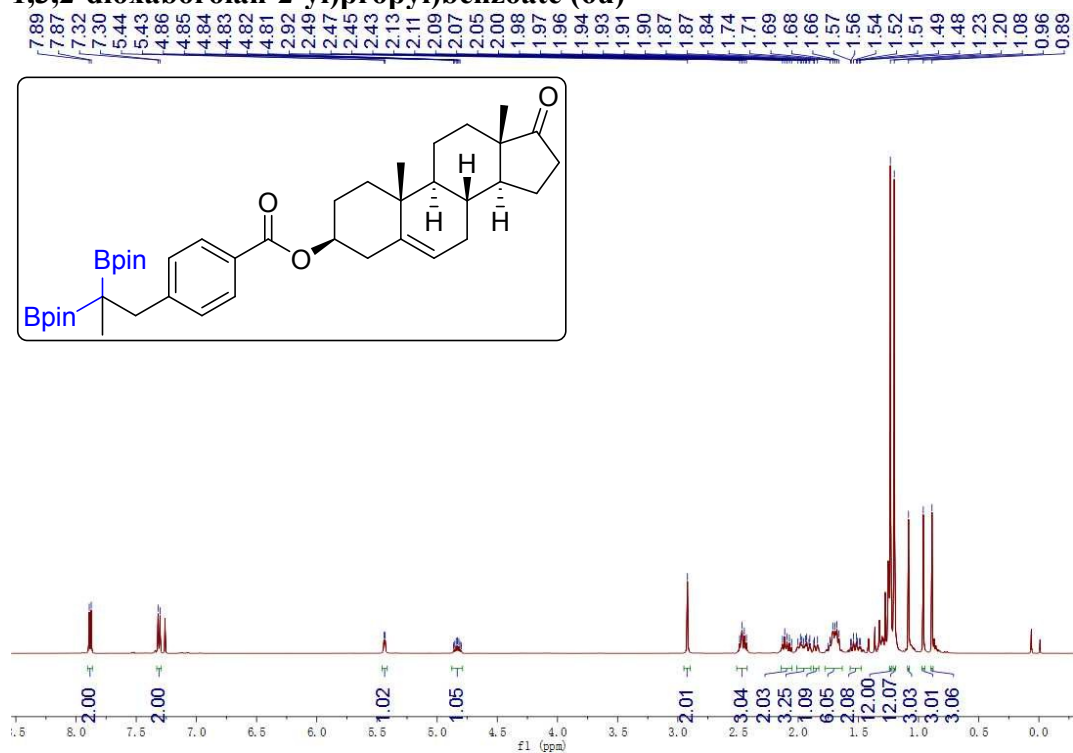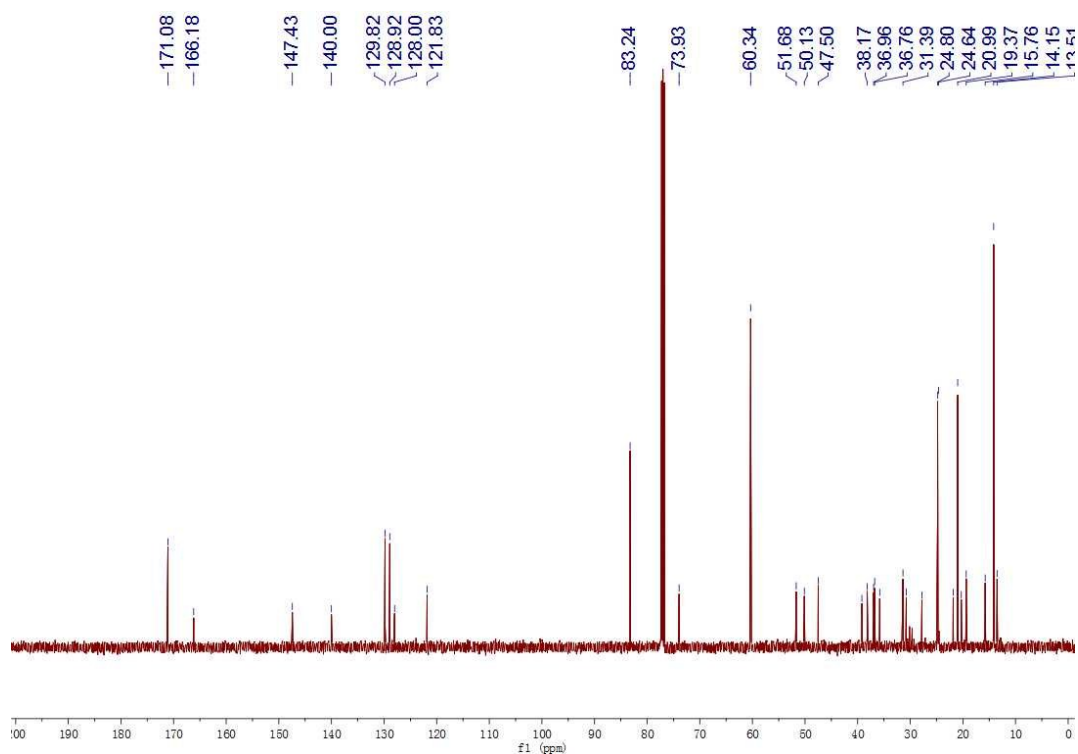

**(3S,8S,9S,10R,13R,14S,17R)-10,13-dimethyl-17-((R)-6-methylheptan-2-yl)-2,3,4,7,8,9,10,11,12,13,14,15,16,17-tetradecahydro-1Hcyclopenta[a]phenanthren-3-yl 4-(2,2-bis(4,4,5,5-tetramethyl-1,3,2-dioxaborolan-2-yl)propyl)benzoate (6v)**

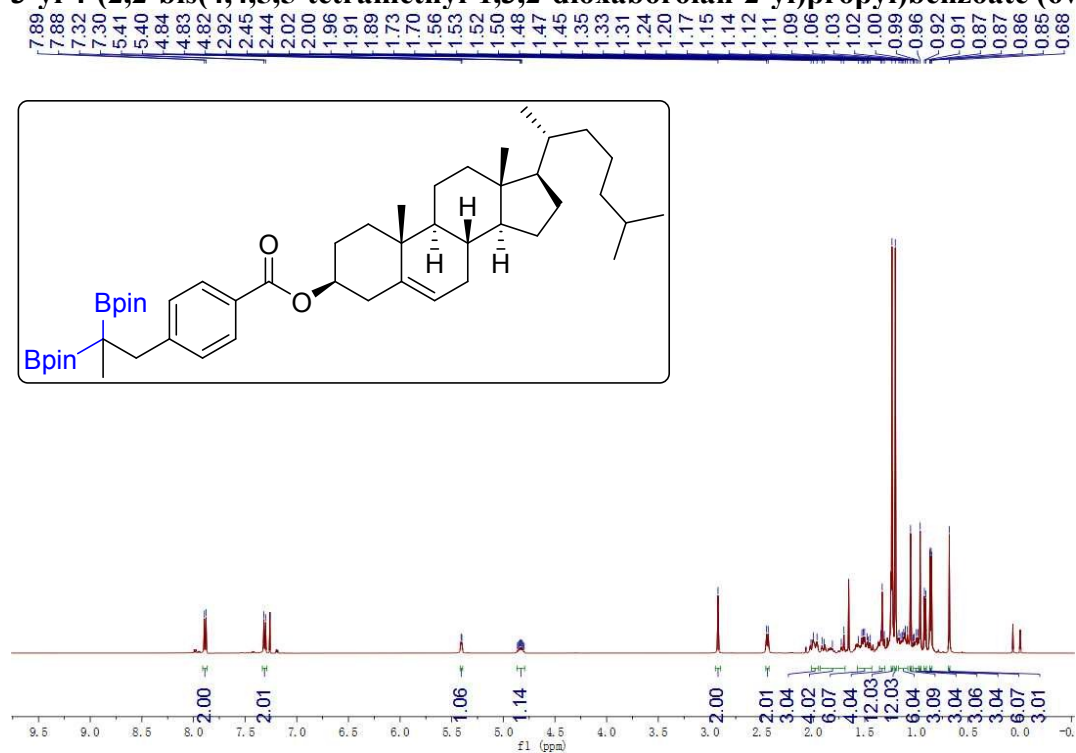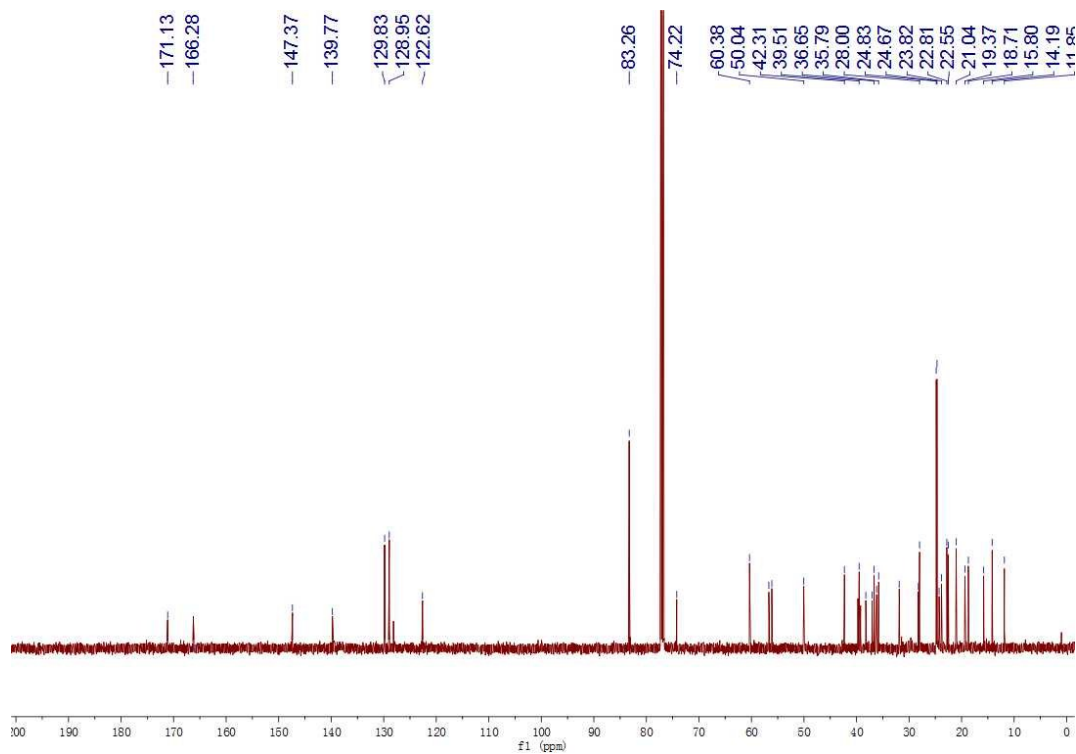



1-(4-(2-(4,4,5,5-tetramethyl-1,3,2-dioxaborolanyl)propyl)phenyl)ethan-1-one (8)

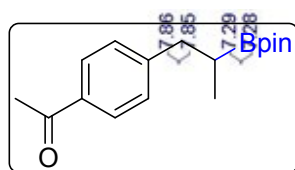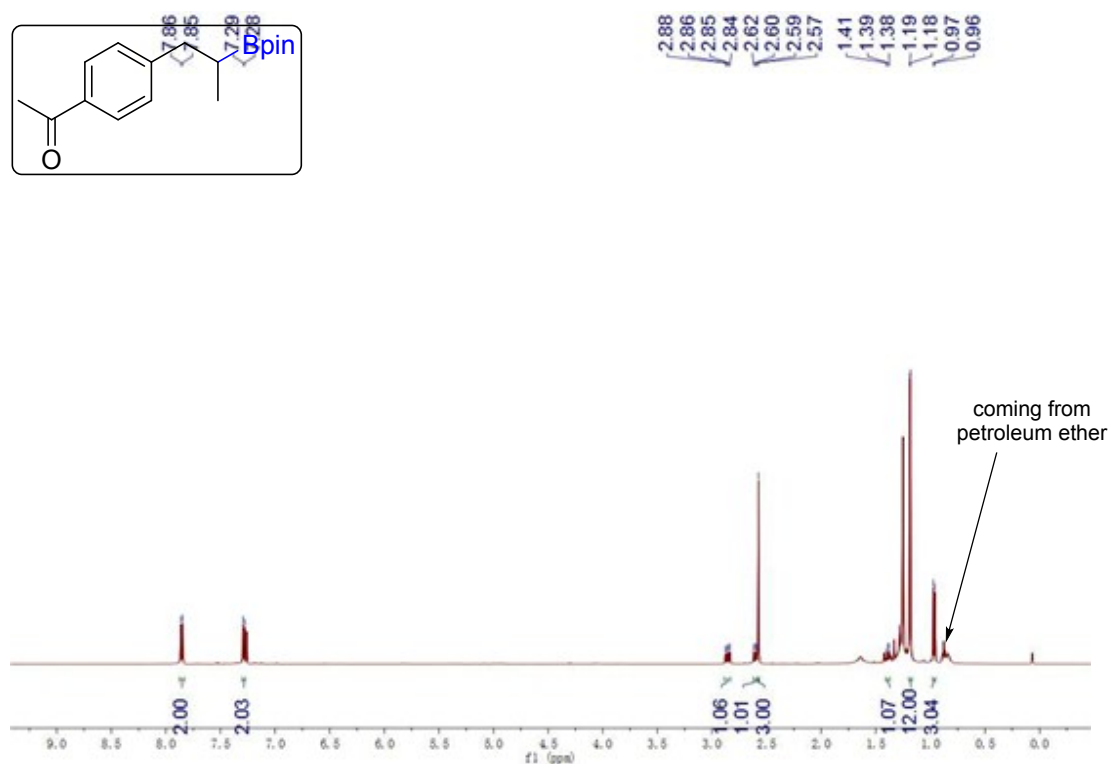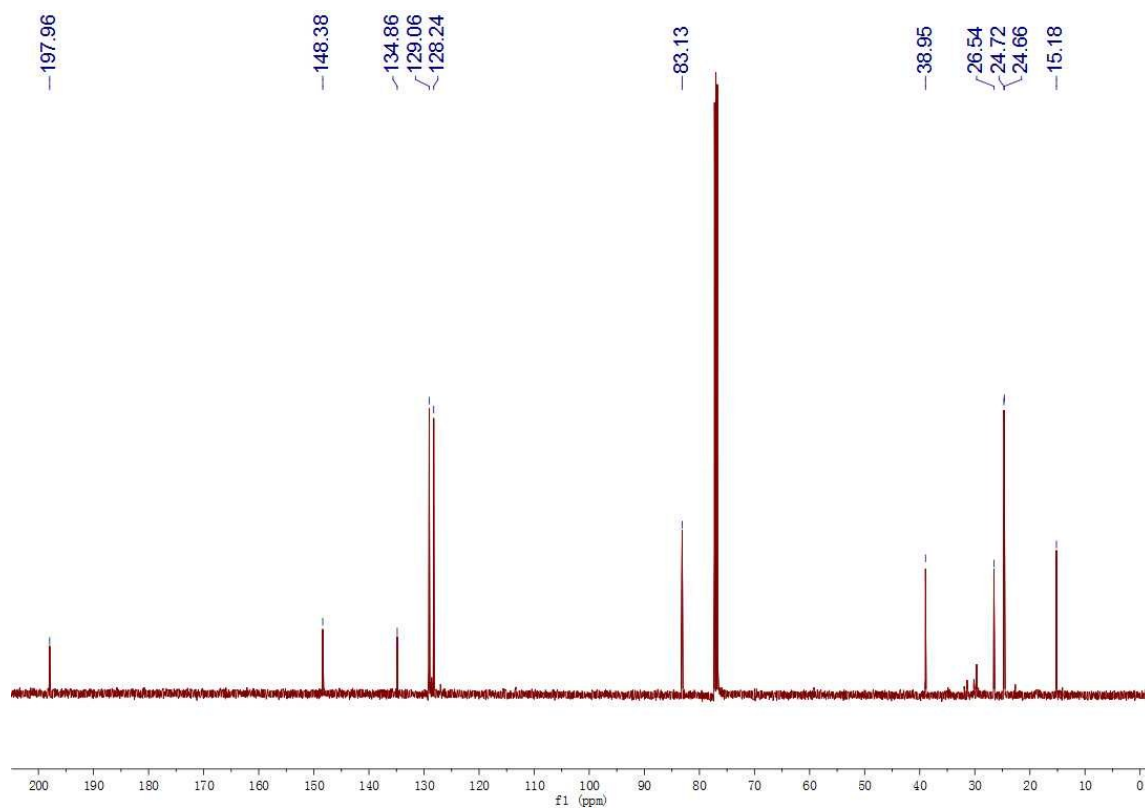

# 1-(4-(2,2-difluoropropyl)phenyl)ethan-1-one (7)

7.93  
7.91  
7.38  
7.36

3.23  
3.20  
3.17  
2.60

1.59  
1.55  
1.51

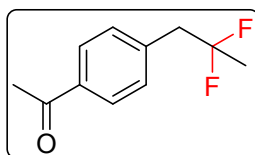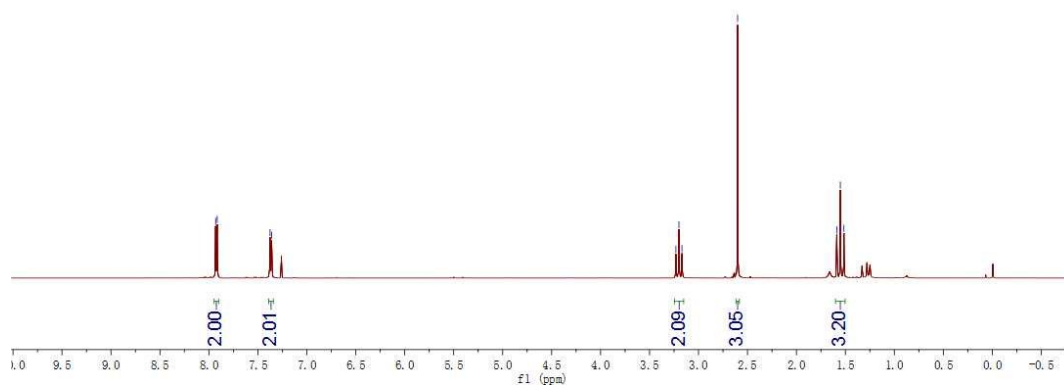

197.75

138.98  
136.19  
130.49  
128.44  
124.81  
122.91  
121.00

44.49  
44.28  
44.07  
26.61  
23.22  
23.00  
22.78

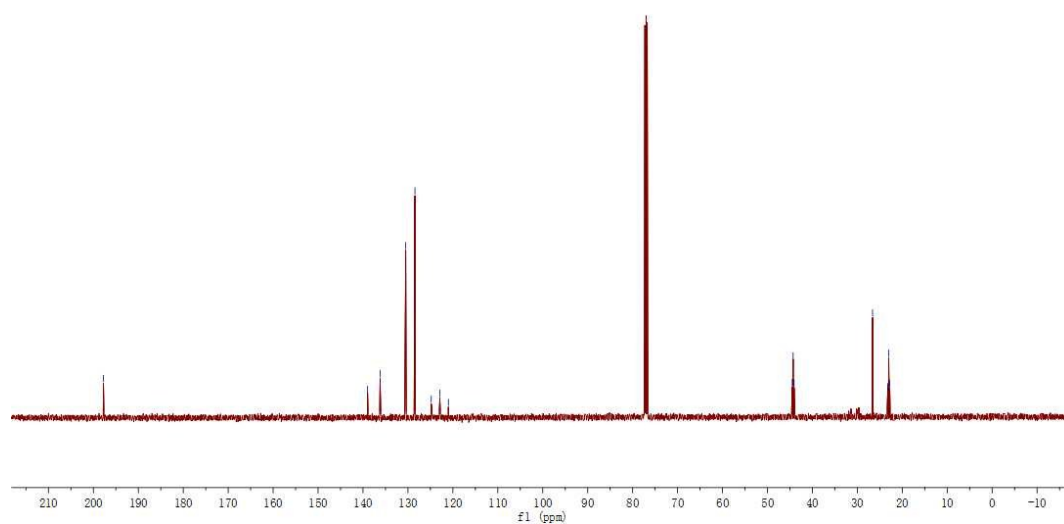

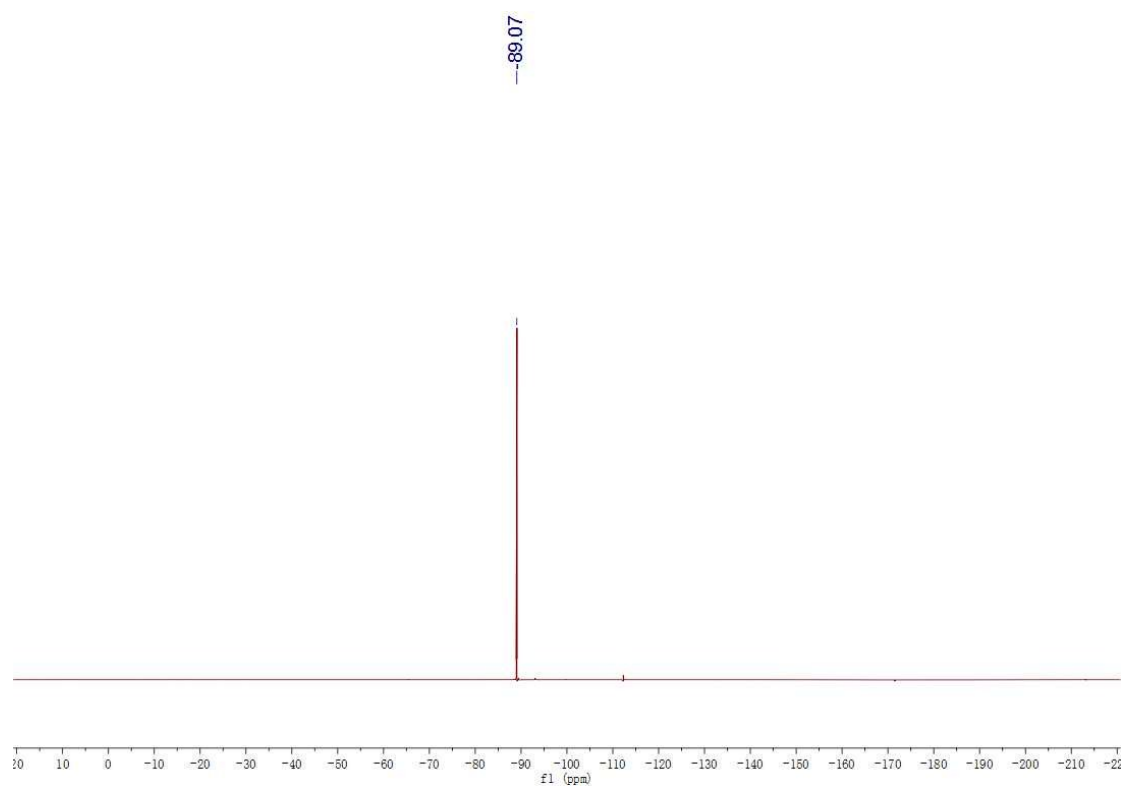

**1-(4-(2-(6-phenylpyridin-2-yl)propyl)phenyl)ethan-1-one (9)**

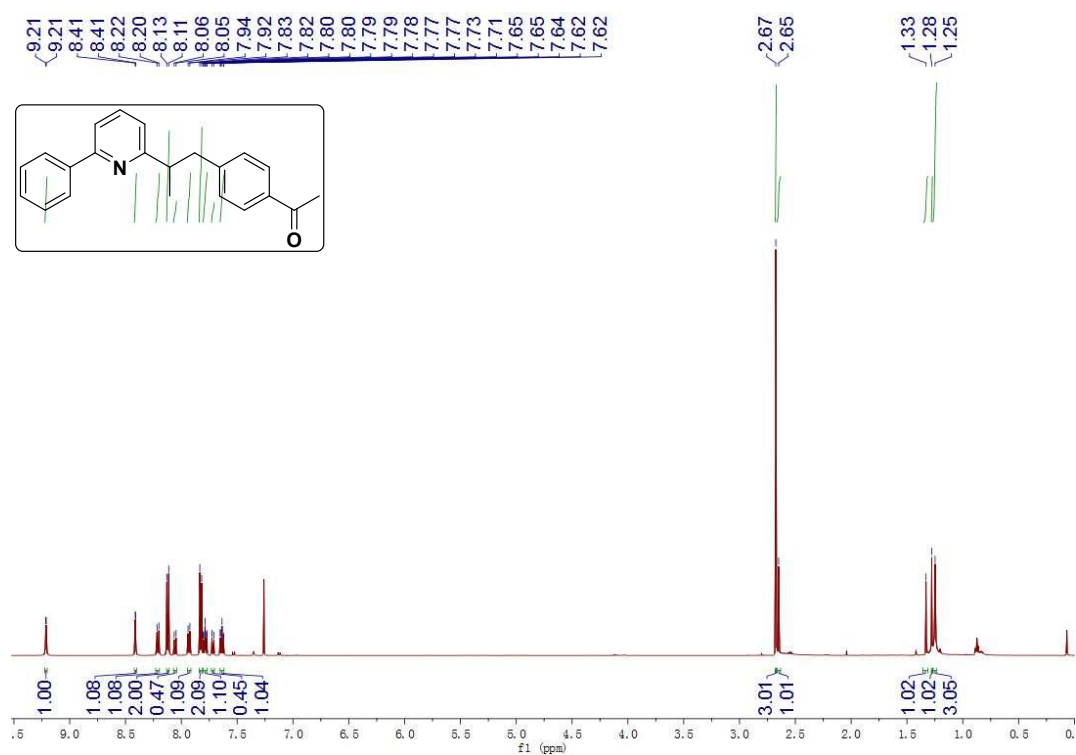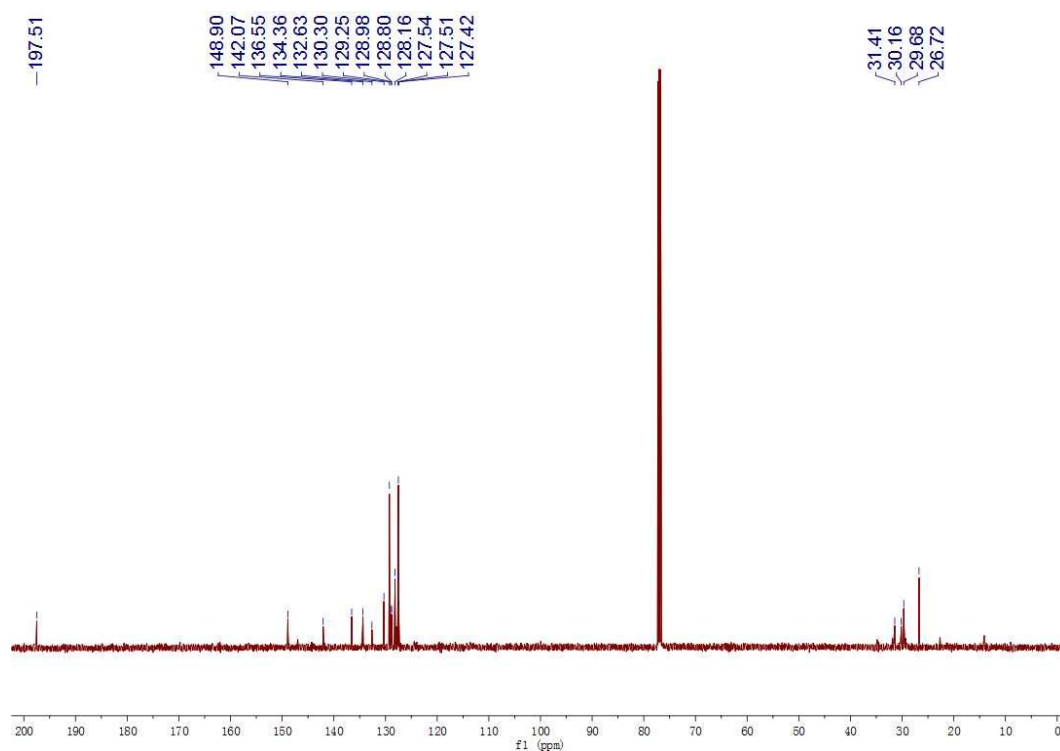

**4,4,5,5-tetramethyl-2-(1-(4-(methylsulfonyl)phenyl)prop-1-en-2-yl)-1,3,2-dioxaborolane (B-1)**

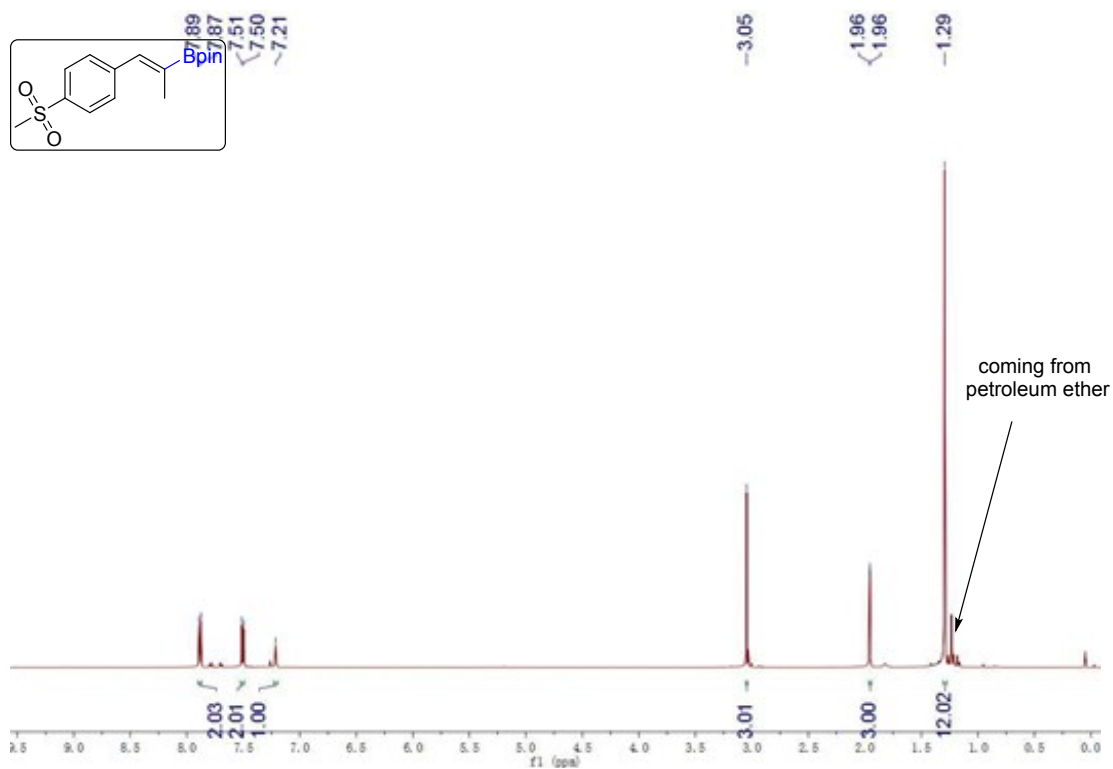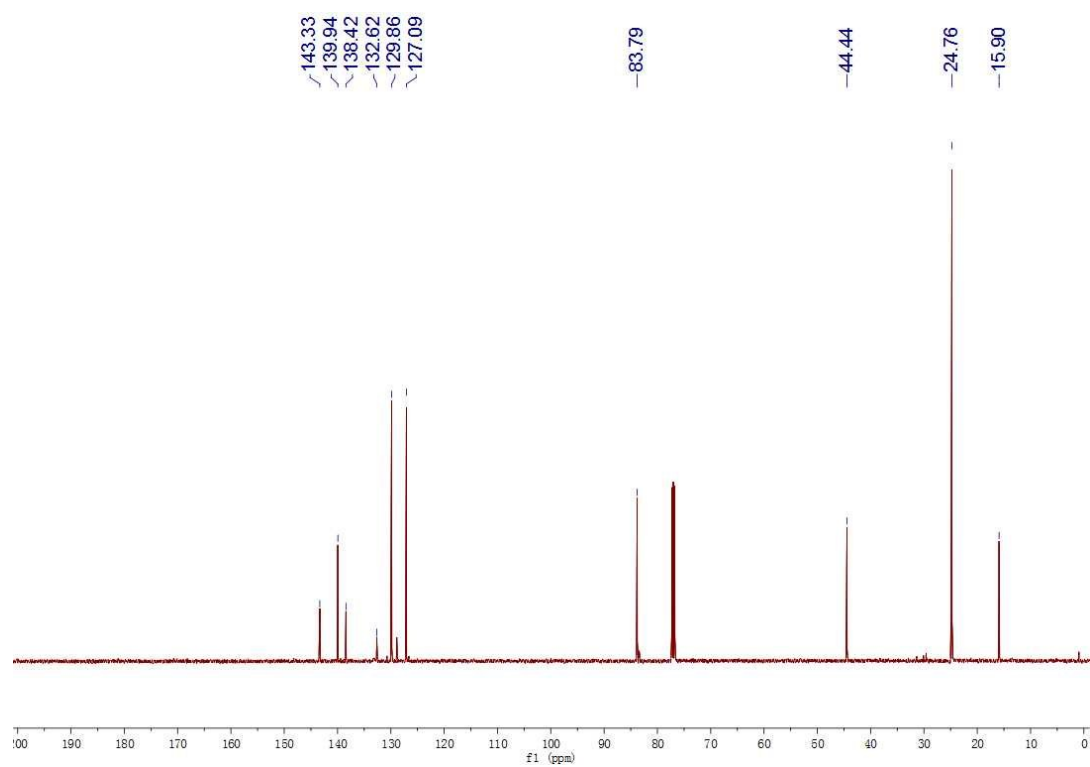

**Ethyl (E)-3-(4,4,5,5-tetramethyl-1,3,2-dioxaborolan-2-yl)acrylate (B-2)**

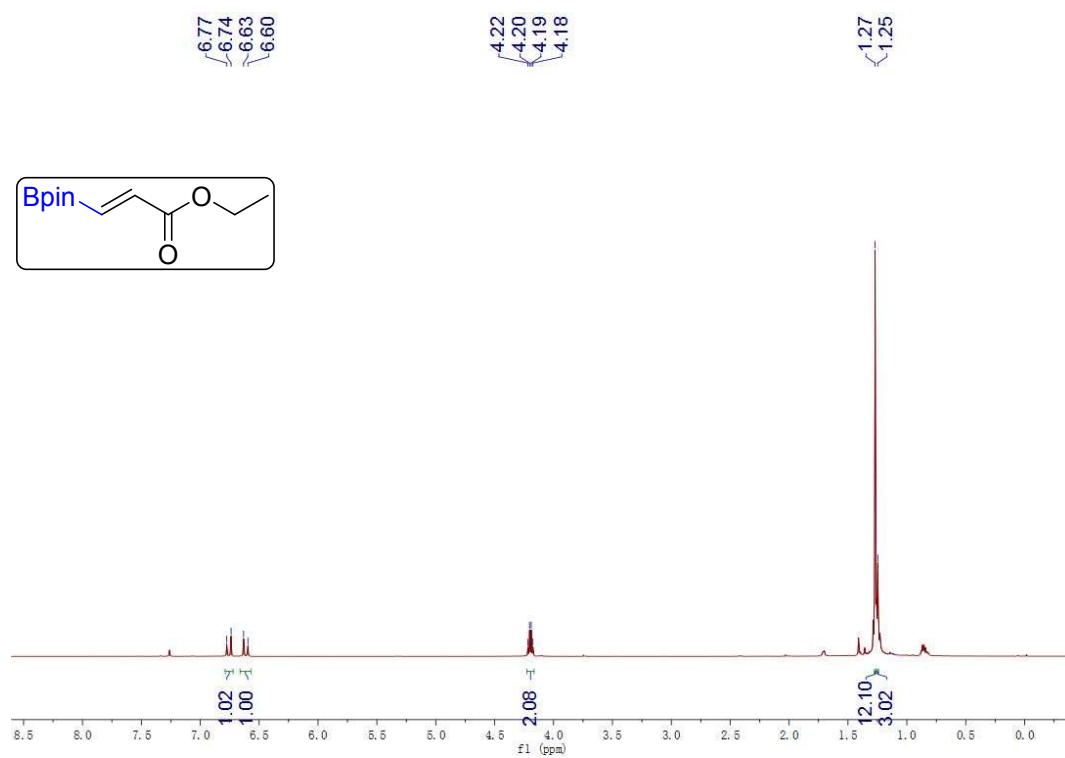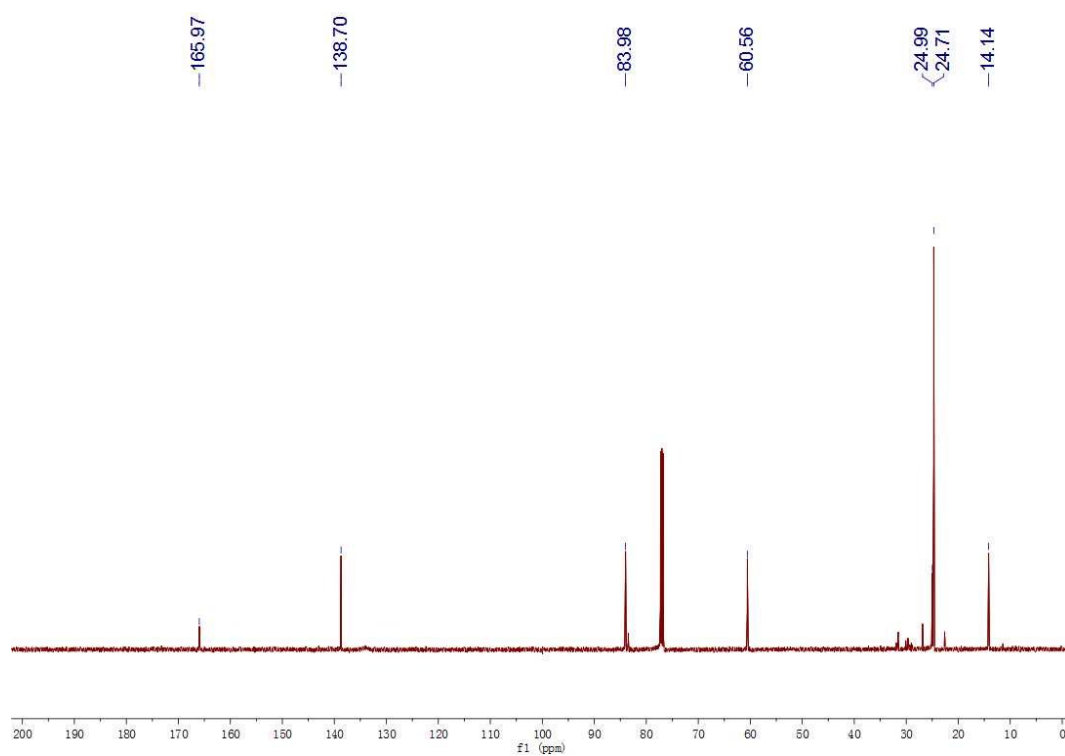

## 11. References

- (1) A.E.G. Baker, E. Marchal, K. A. R. Lund and A. Thompson, *Can. J. Chem.* 2014, **92**, 1175.
- (2) K. Ishihara and Y. Lu, *Chem. Sci.* 2016, **7**, 1276.
- (3) R. K. Shiroodi, M. Soltani and V. Gevorgyan, *J. Am. Chem. Soc.* 2014, **136**, 9882.
- (4) A. Morinaga, K. Nagao, H. Ohmiya and M. Sawamura, *Angew. Chem. Int. Ed.* 2015, **54**, 15859.
- (5) P. N. P. Rao, M. J. Uddin, and E. E. Knaus, *J. Med. Chem.* 2004, **47**, 3972.
- (6) J. Moon, M. Jang and S. Lee, *J. Org. Chem.* 2008, **74**, 1403.
- (7) K. Yang and Q. Song, *Green Chem.* 2016, **18**, 932.
- (8) D. Janssen-Müller, M. Schedler, M. Fleige, C. G. Daniliuc and F. Glorius, *Angew. Chem. Int. Ed.* 2015, **54**, 12492.
- (9) Z. Li, Z. Wang, L. Zhu, X. Tan and C. Li, *J. Am. Chem. Soc.* 2014, **136**, 16439.
- (10) H. Zhao, M. Tong, H. Wang and S. Xu, *Org. Biomol. Chem.* 2017, **15**, 3418.
- (11) C. Hwang, W. Jo and S. H. Cho, *Chem. Commun.* 2017 **53**, 7573.
- (12) J. C. H. Lee, H. Y. Sun, and D. G. Hall, *J. Org. Chem.* 2015, **80**, 7134.
- (13) J. E. Lee, J. Kwon and J. Yun, *Chem. Commun.* 2008, **0**, 733.
- (14) M. Gao, S. B. Thorpe and W. L. Santos, *Org. Lett.* 2009, **11**, 3478.
- (15) R. Murakami, T. Iwai and M. Sawamura, *Synlett.* 2016, **27**, 1187.
